# Supplementary material
Source: MDPI journal article supplement (https://www.mdpi.com/2073-4344/13/8/1227)

# Efficient Regioselective Synthesis of Novel Ensembles of Organylselanyl-Functionalized Divinyl Sulfides and 1,3-Thiaselenoles Under Phase Transfer Catalysis Conditions

Andrey S. Filippov, Svetlana V. Amosova, Nataliya A. Makhaeva, Alexander I. Albanov \* and Vladimir A. Potapov

A. E. Favorsky Irkutsk Institute of Chemistry, Siberian Division of The Russian Academy of Sciences, 1 Favorsky Str., Irkutsk 664033, Russia; filippov@irioch.irk.ru (A.S.F.); amosova@irioch.irk.ru (S.V.A.); ggm@irioch.irk.ru (N.A.M.); v.a.potapov@mail.ru (V.A.P.)

\* Correspondence: albanov@irioch.irk.ru

## Table of Contents

|                                                                                                                   |       |
|-------------------------------------------------------------------------------------------------------------------|-------|
| Experimental                                                                                                      | 2     |
| <sup>1</sup> H, <sup>13</sup> C and <sup>77</sup> Se NMR spectra of compounds <b>1</b> and <b>2</b>               | 3-9   |
| <sup>1</sup> H, <sup>13</sup> C and <sup>77</sup> Se NMR spectra of compounds <b>3a-e</b> and <b>4</b>            | 10-27 |
| <sup>1</sup> H, <sup>13</sup> C and <sup>77</sup> Se NMR spectra of compounds <b>5a-c</b>                         | 28-36 |
| <sup>1</sup> H, <sup>13</sup> C and <sup>77</sup> Se NMR spectra of compounds <b>6a,b</b> , <b>7</b> and <b>8</b> | 37-48 |

## Experimental

The  $^1\text{H}$  (400.1 MHz),  $^{13}\text{C}$  (100.6 MHz), and  $^{77}\text{Se}$  (76.3 MHz) NMR spectra (the spectra can be found in Supplementary Materials) were recorded on a Bruker DPX-400 spectrometer (Bruker BioSpin GmbH, Rheinstetten, Germany) in  $\text{CDCl}_3$  solutions and referred to the residual solvent peaks ( $\text{CDCl}_3$ ,  $\delta = 7.27$  and  $77.0$  ppm for  $^1\text{H}$ - and  $^{13}\text{C}$ -NMR, respectively), and dimethyl selenide ( $^{77}\text{Se}$ ).

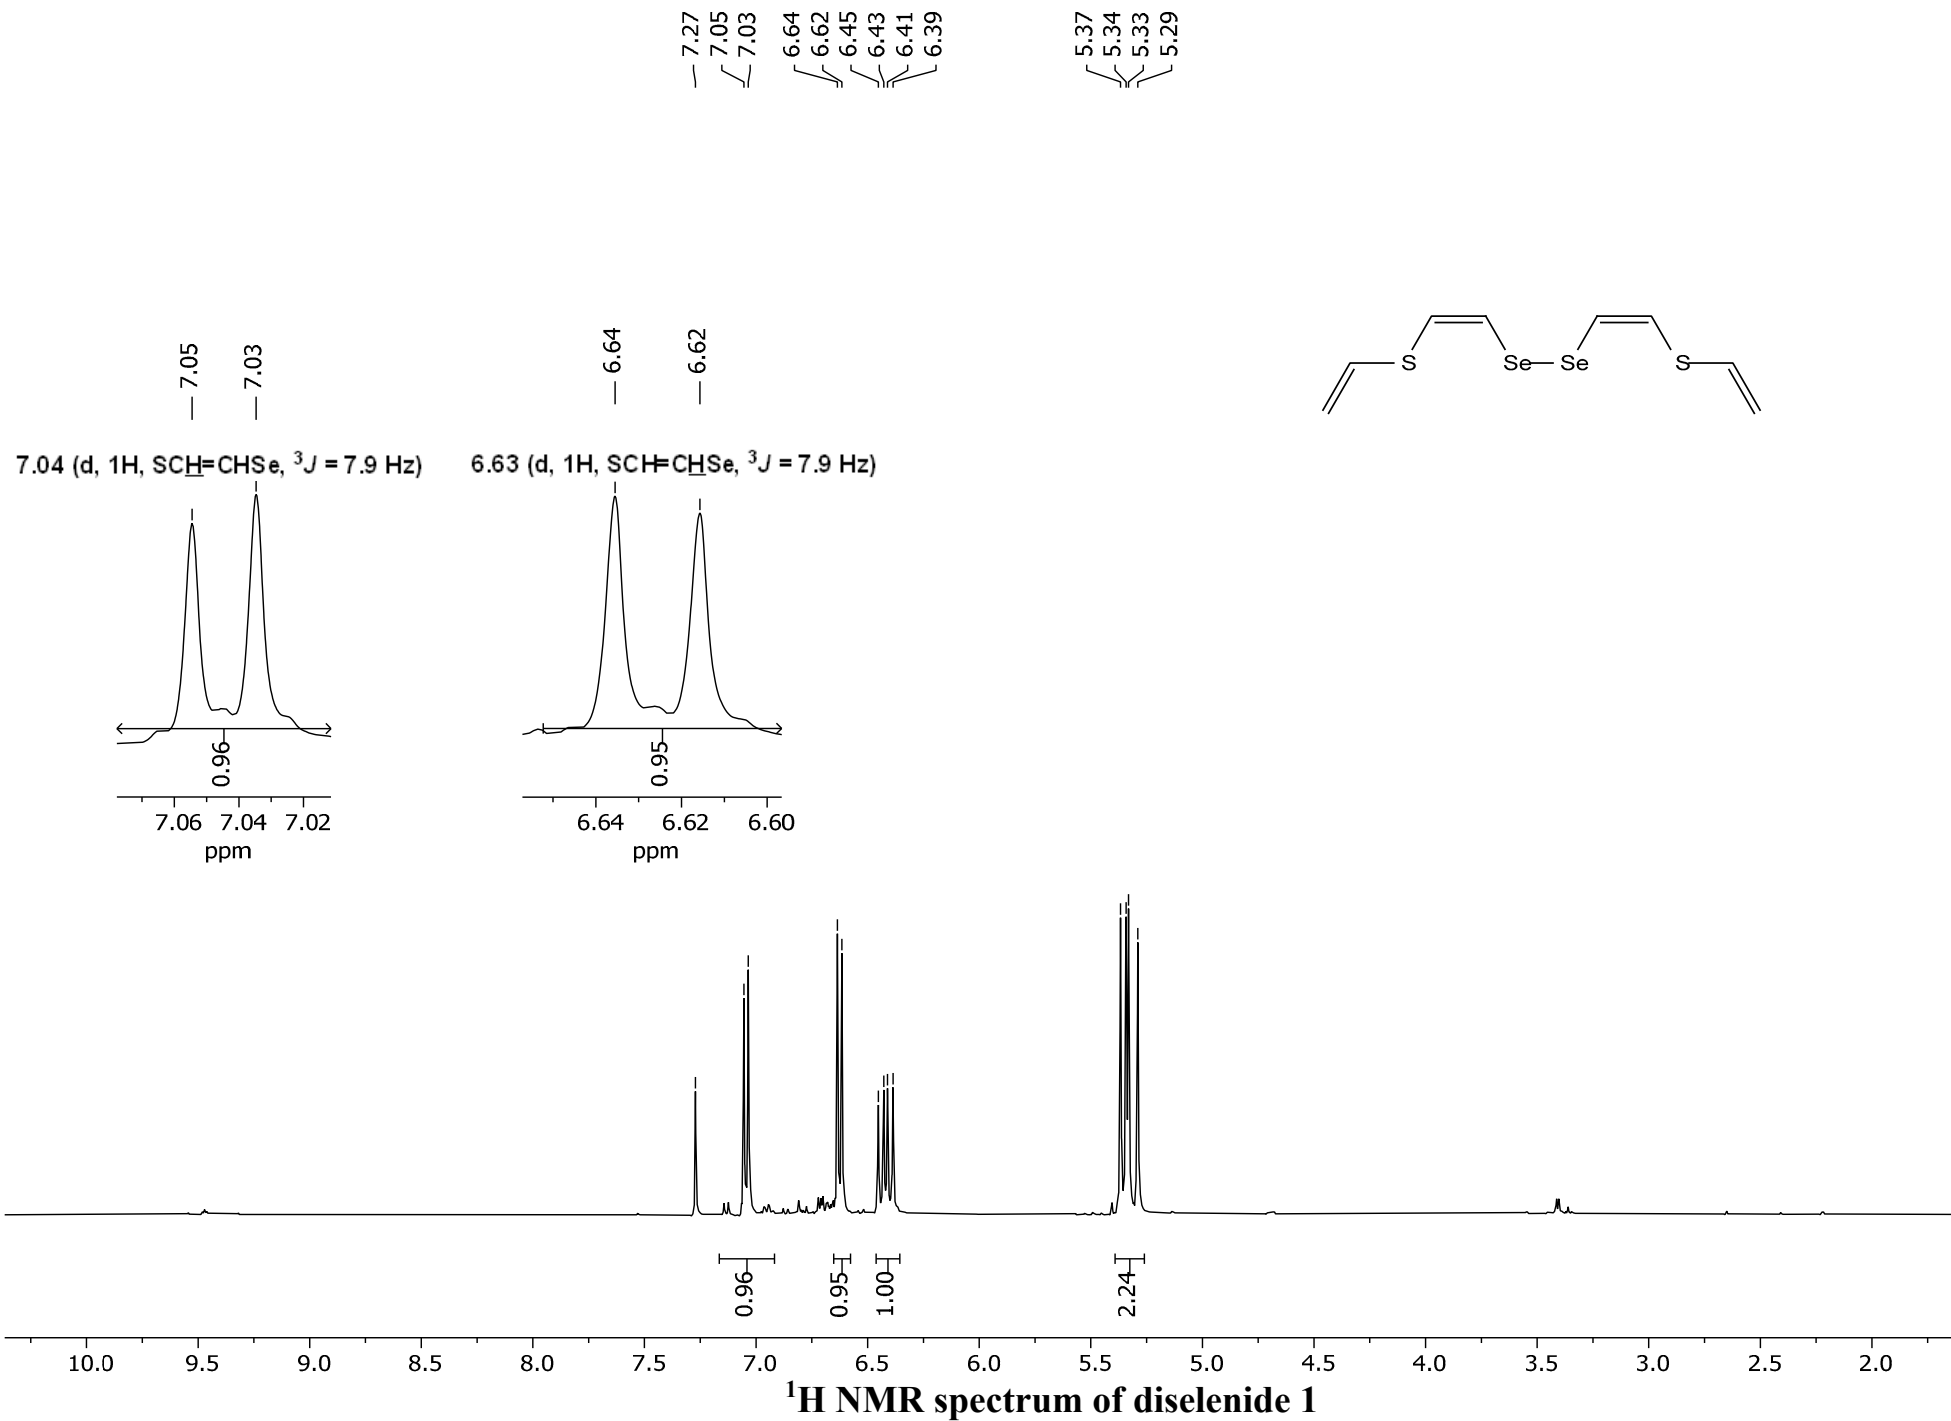

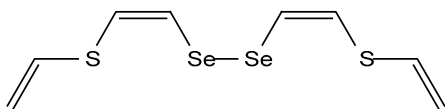

$\sim$  129.61  
 $\sim$  127.72  
 $\sim$  124.95  
 $-$  114.37  
 $-$  77.00

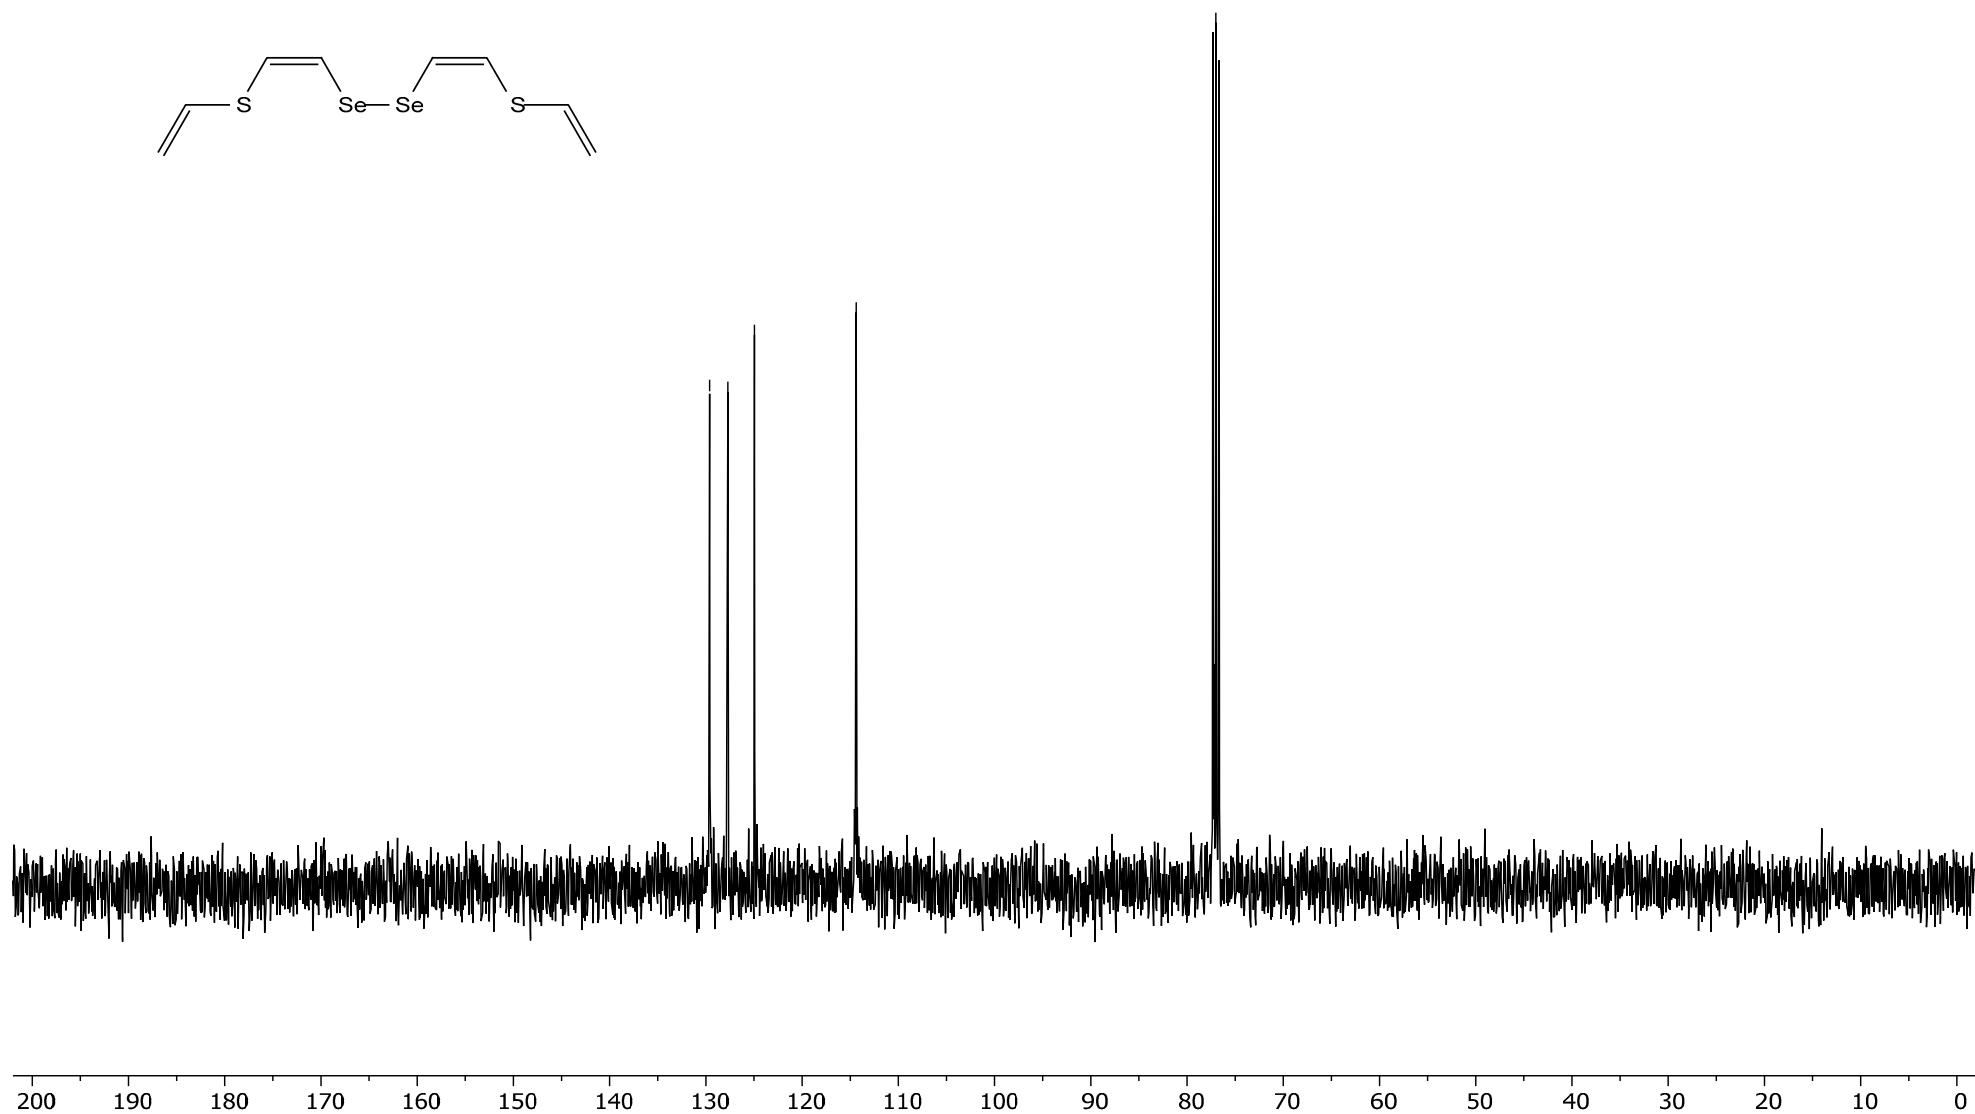

**$^{13}\text{C}$  NMR spectrum of diselenide 1**

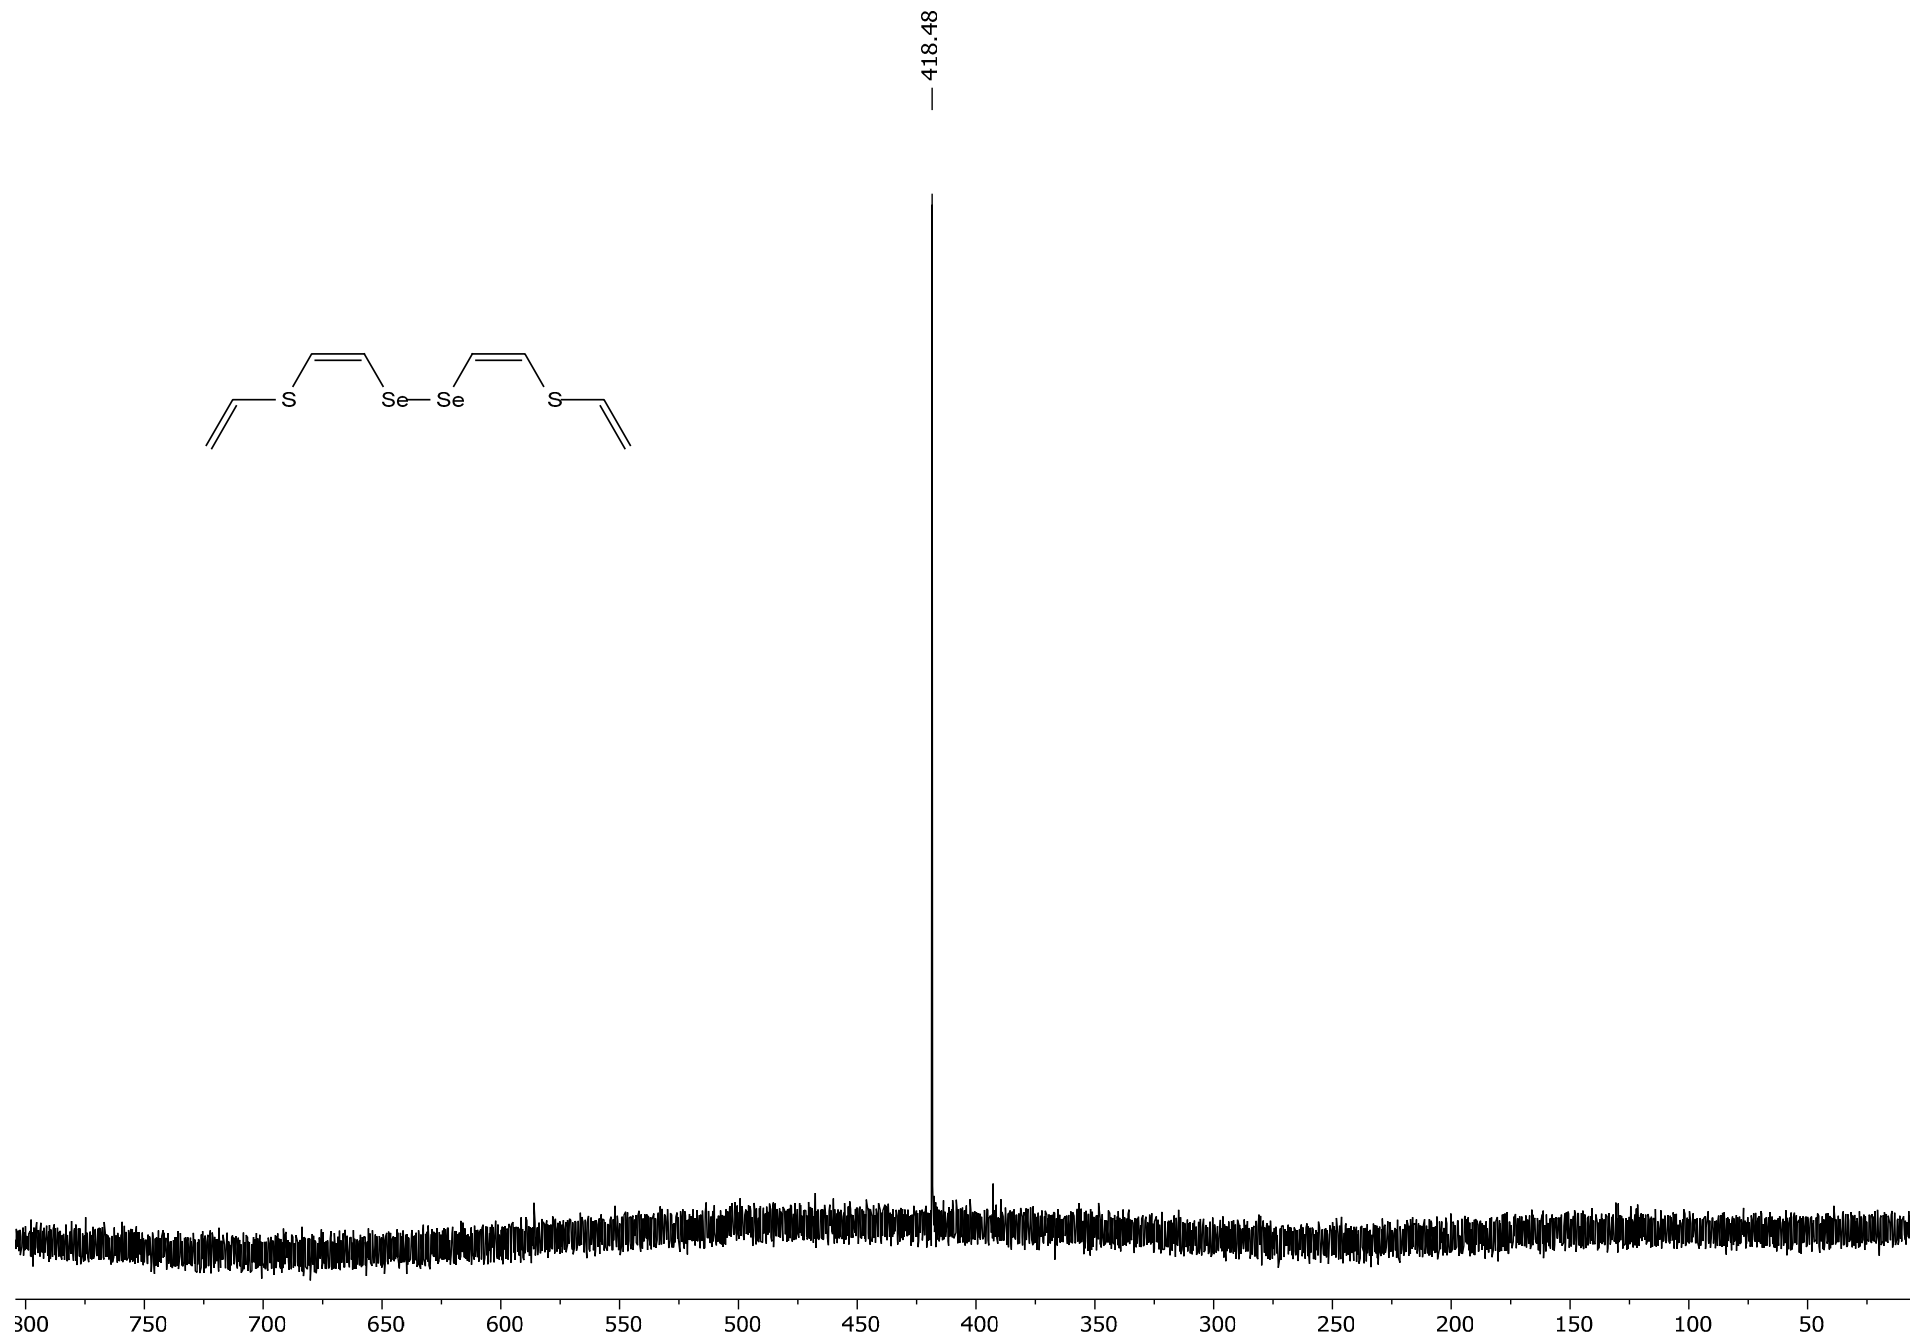

$^{77}\text{Se}$  NMR spectrum of diselenide 1

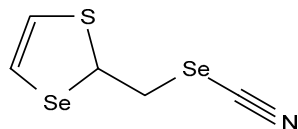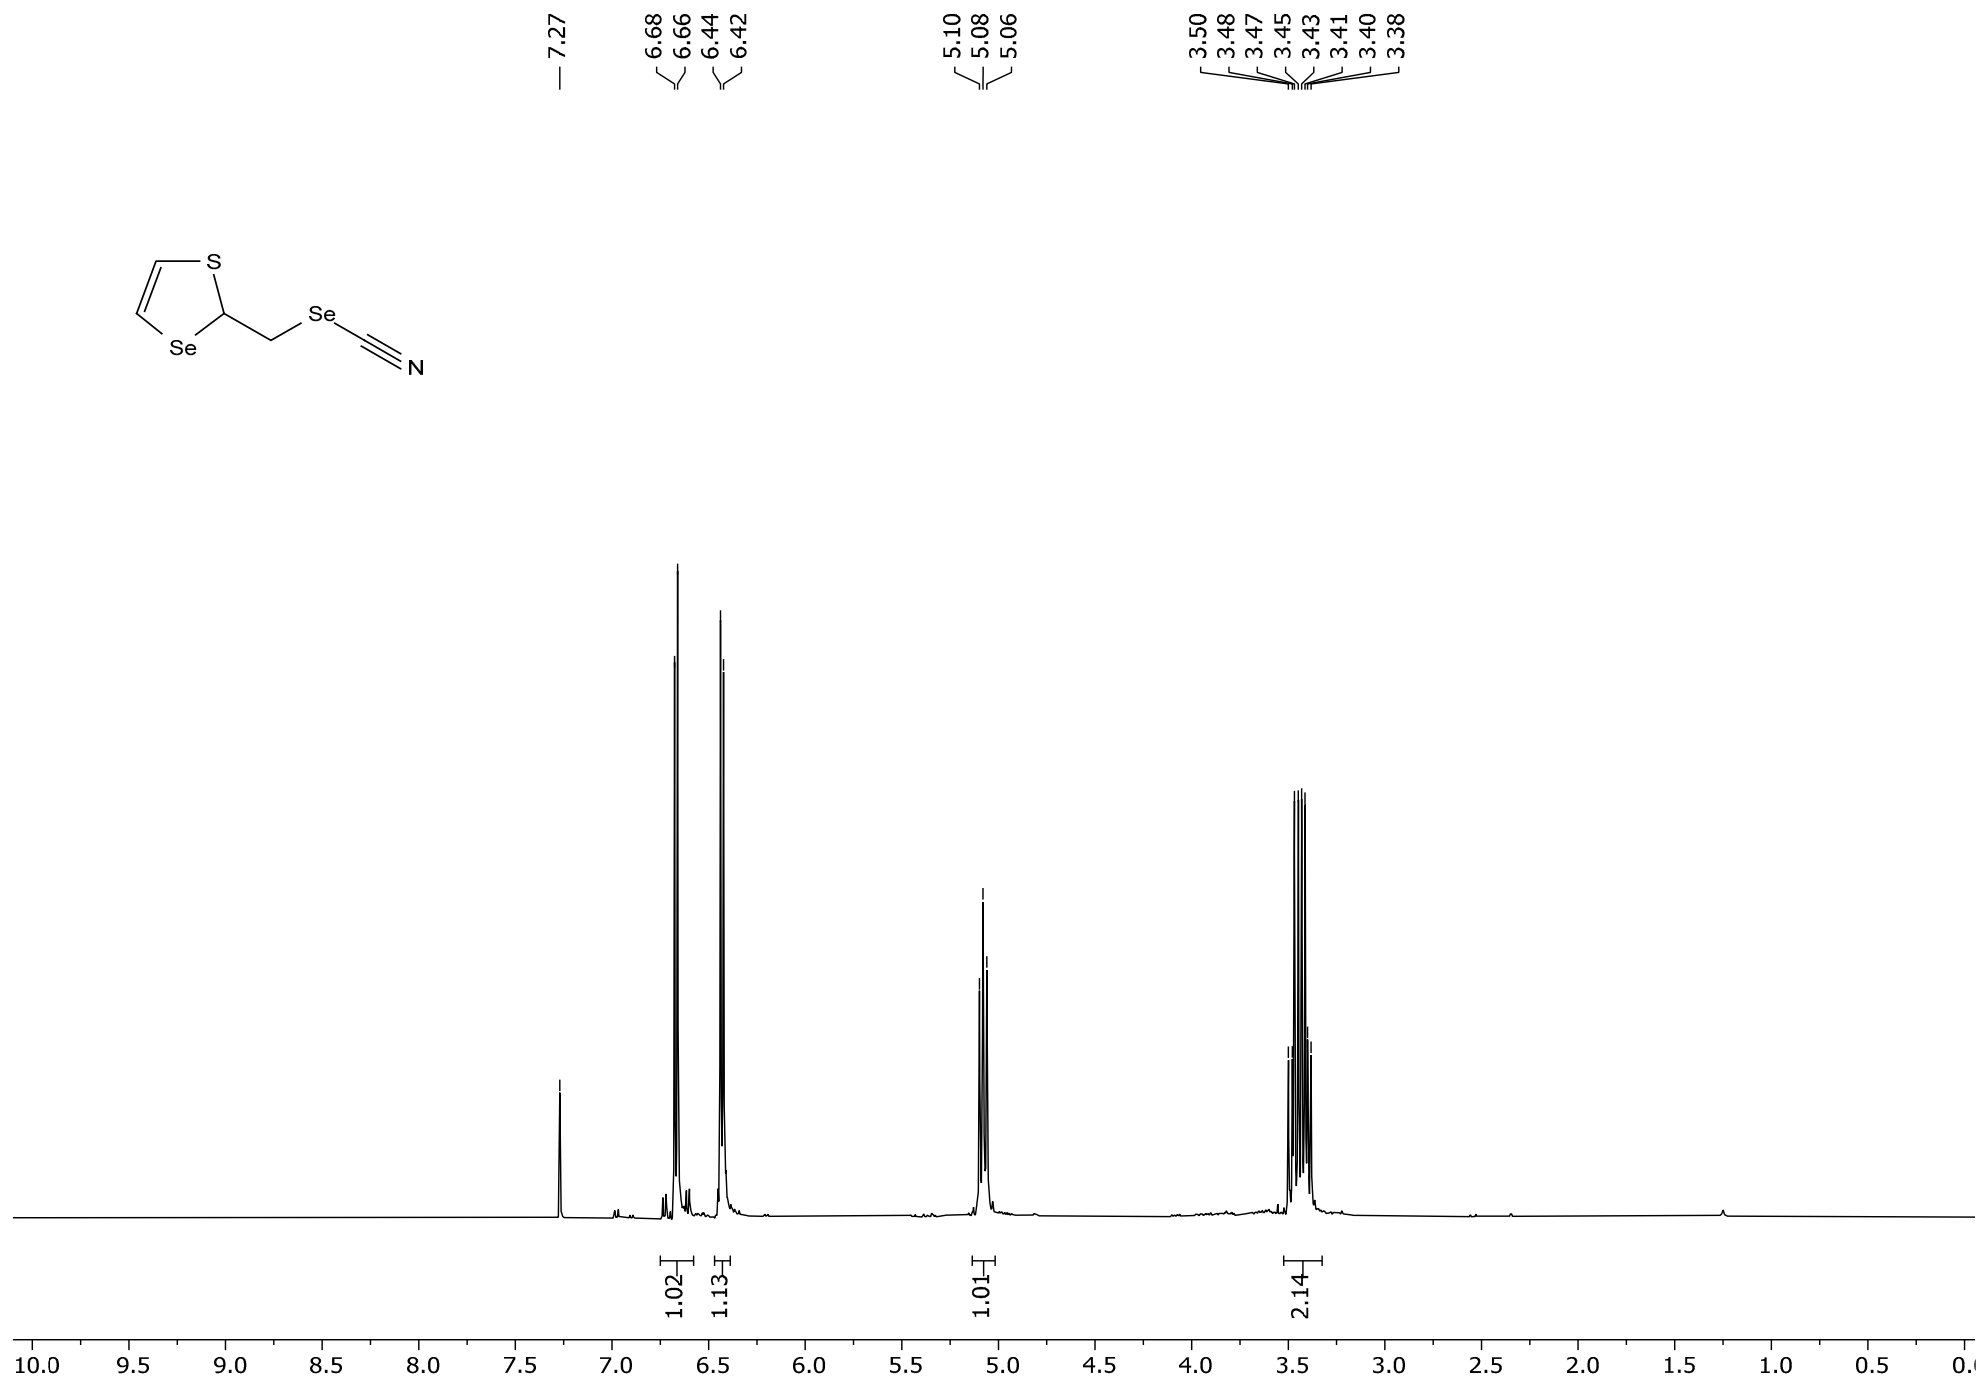

**$^1\text{H}$  NMR spectrum of 1,3-thiaselenol-2-ylmethyl selenocyanate (2)**

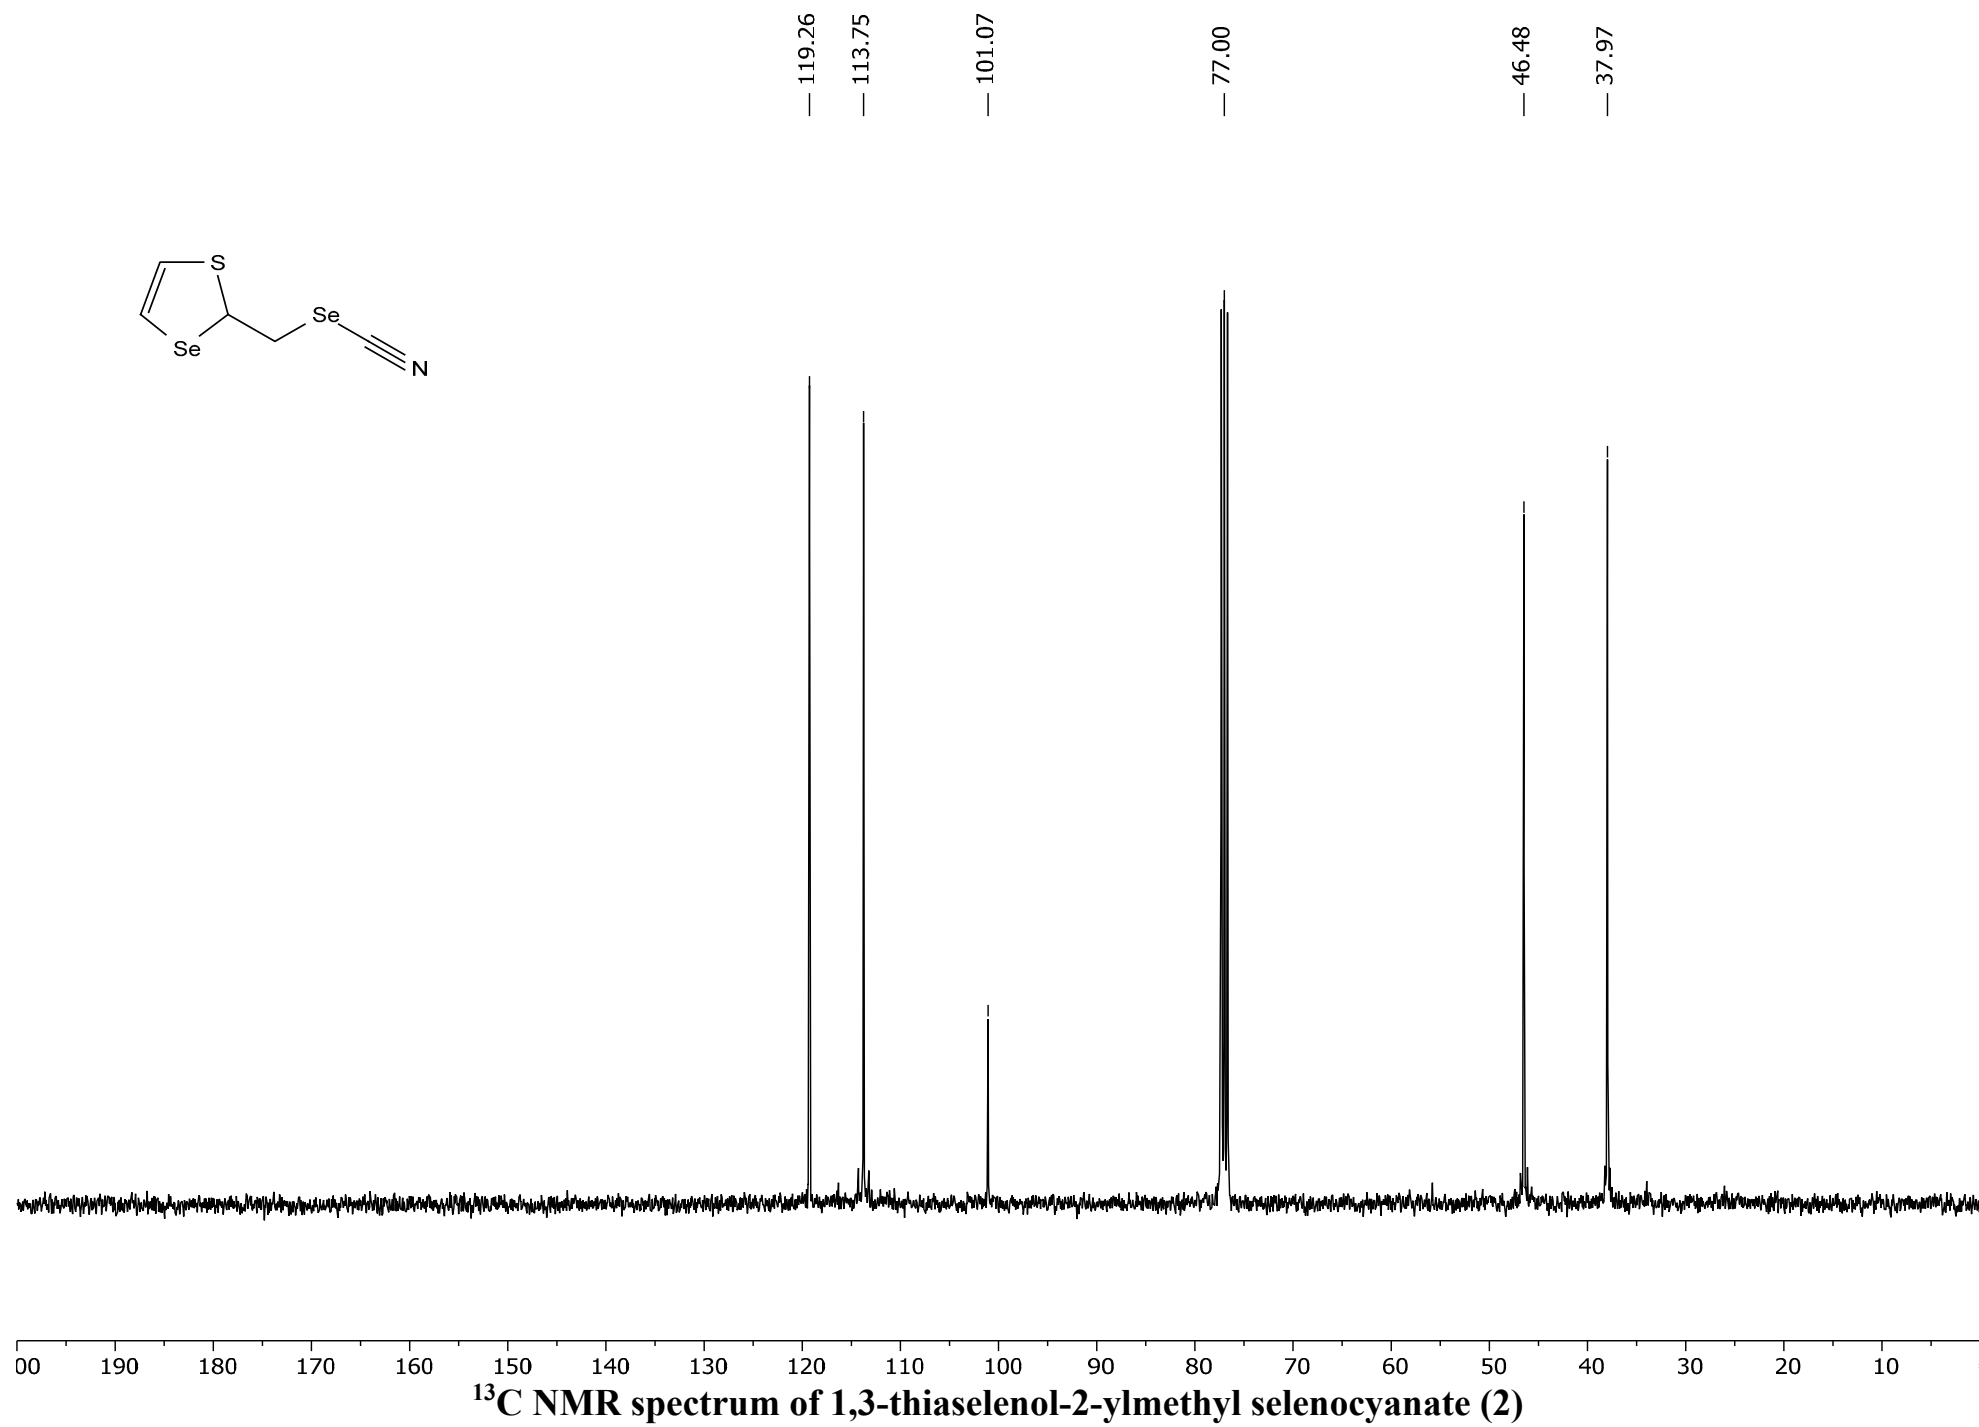

$^{13}\text{C}$  Jmod

119.33  
119.17  
113.81  
113.70

101.08

46.48

37.96

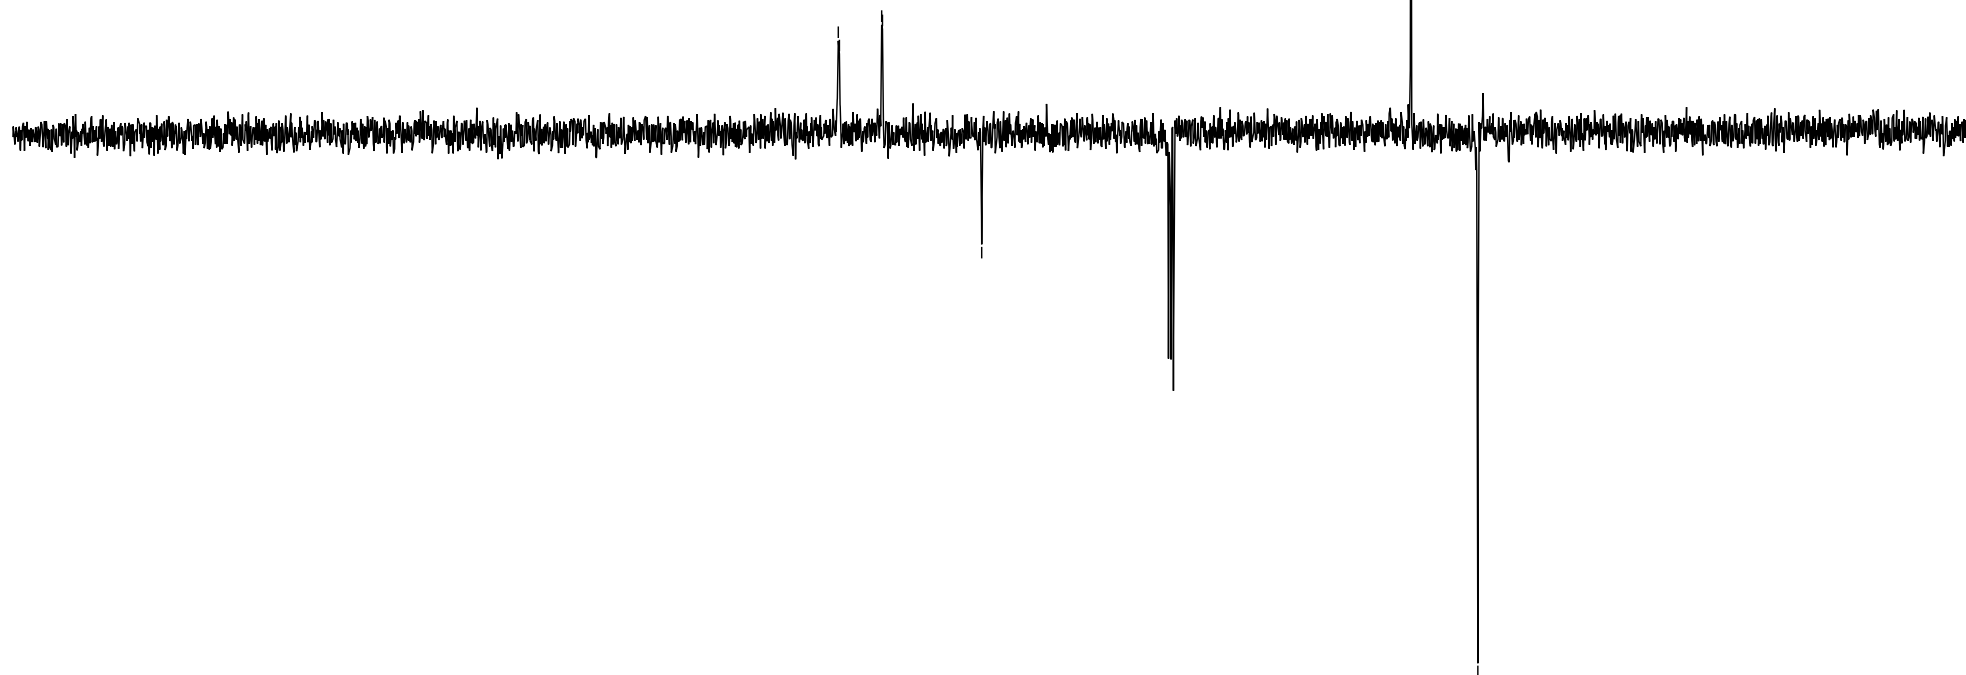

$^{13}\text{C}$  NMR J<sub>mod</sub> spectrum of 1,3-thiaselenol-2-ylmethyl selenocyanate (2)





— 539.61

— 228.41

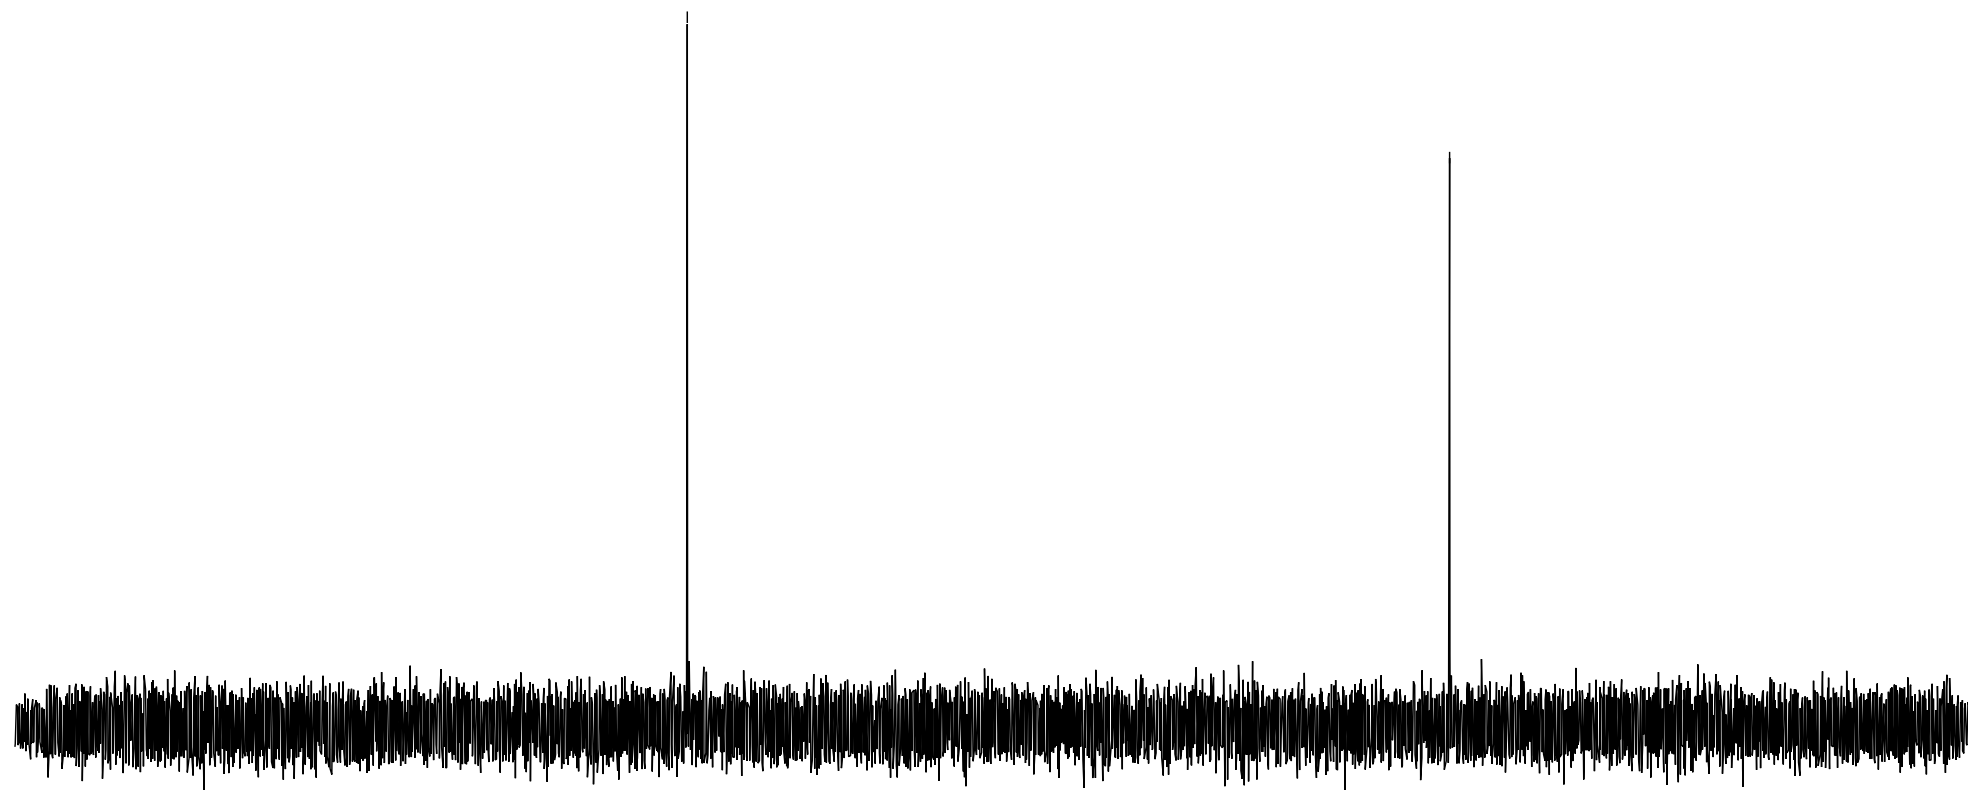

$^{77}\text{Se}$  NMR spectrum of 1,3-thiaselenol-2-ylmethyl selenocyanate (2)

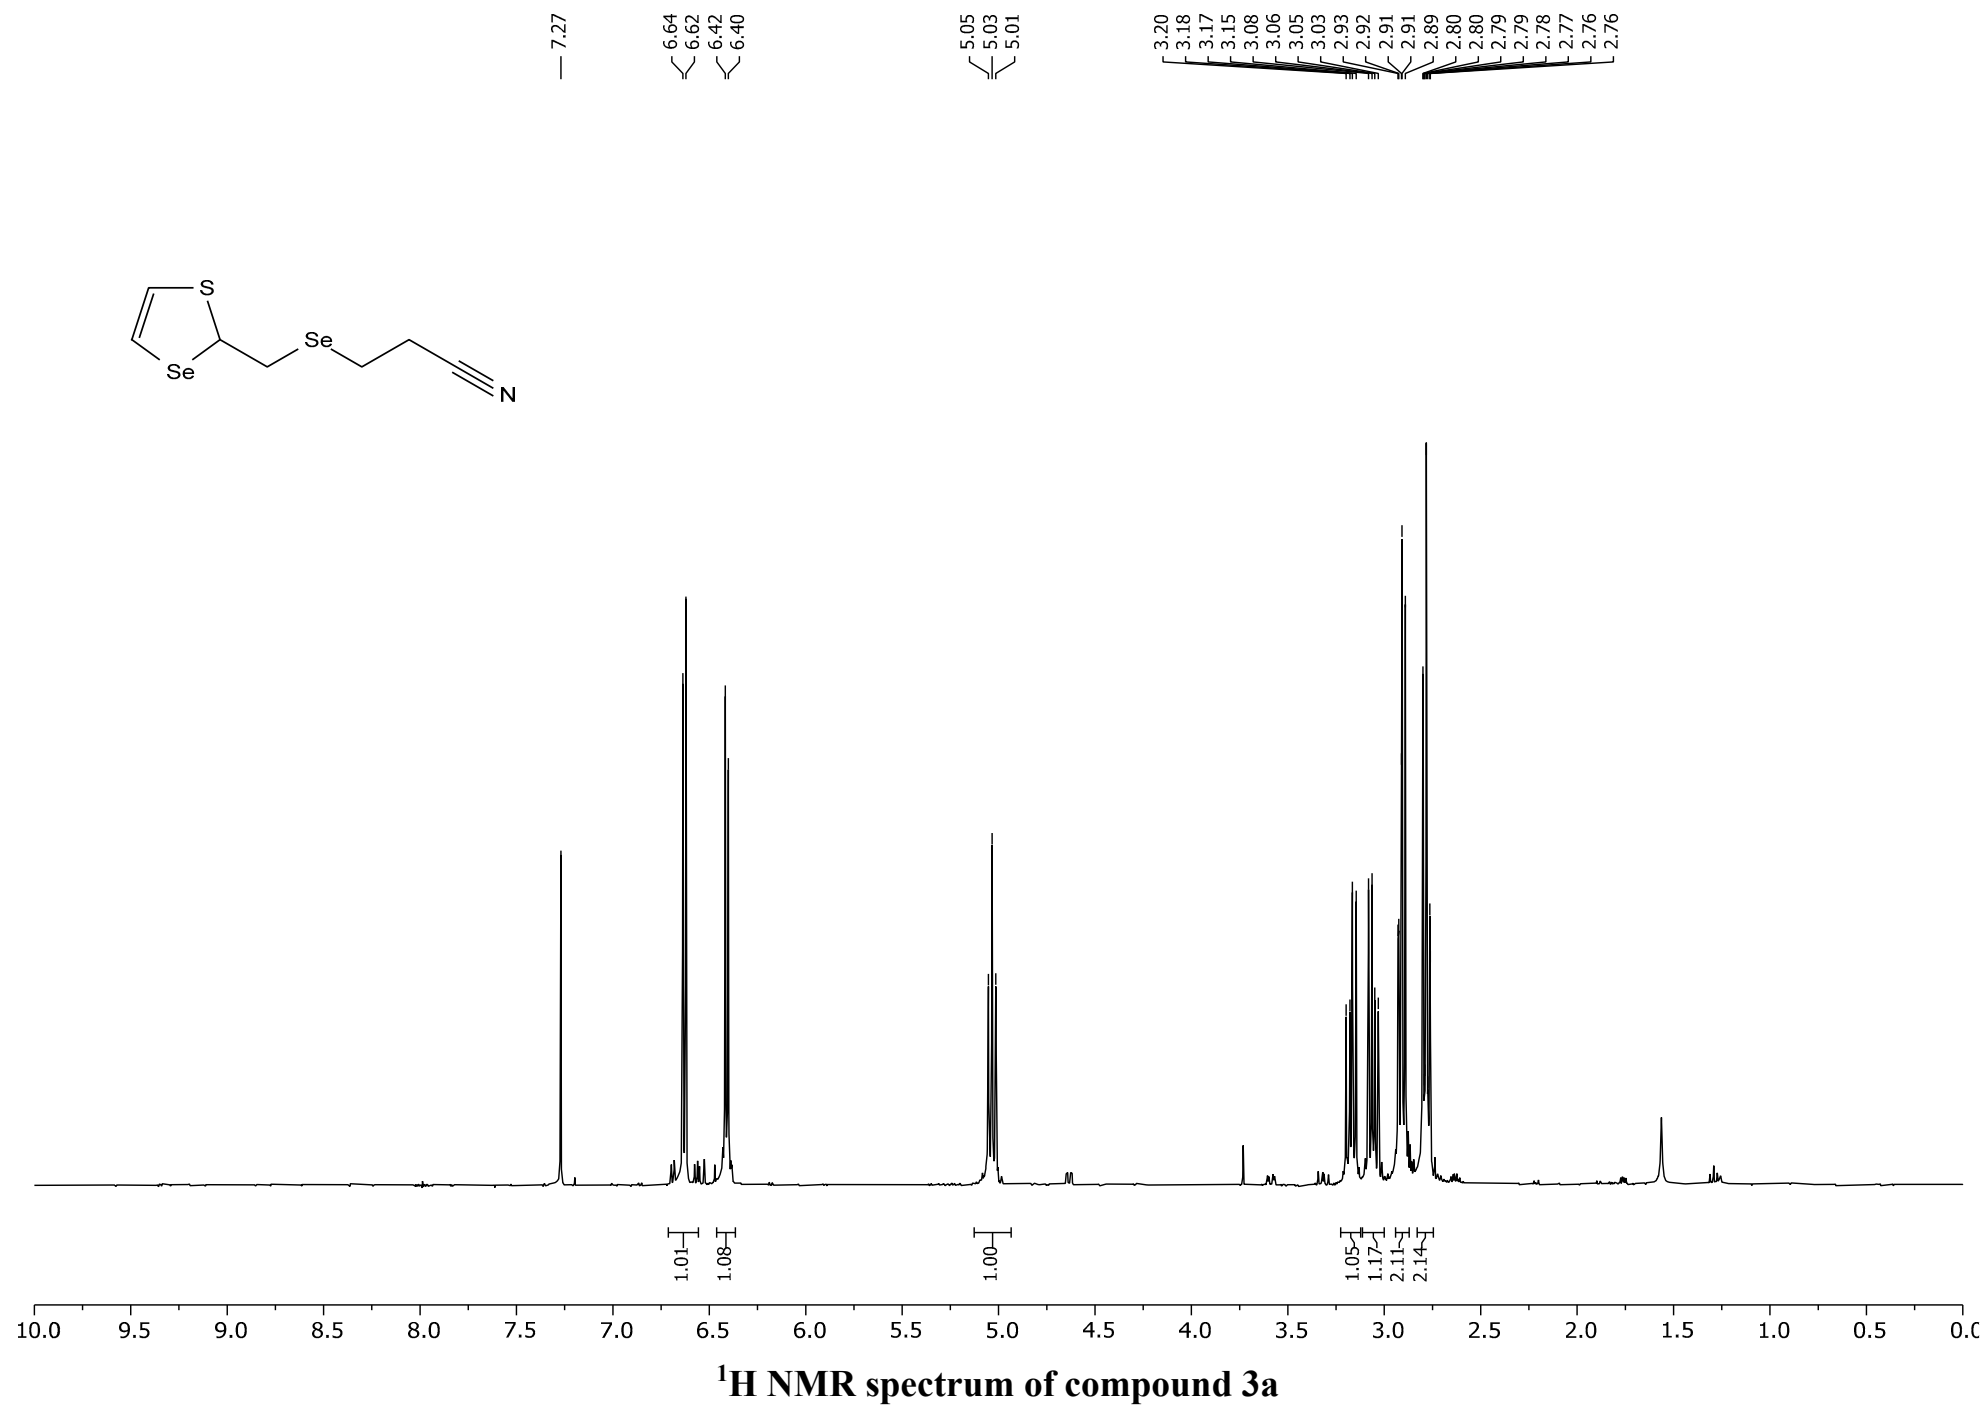

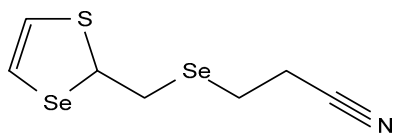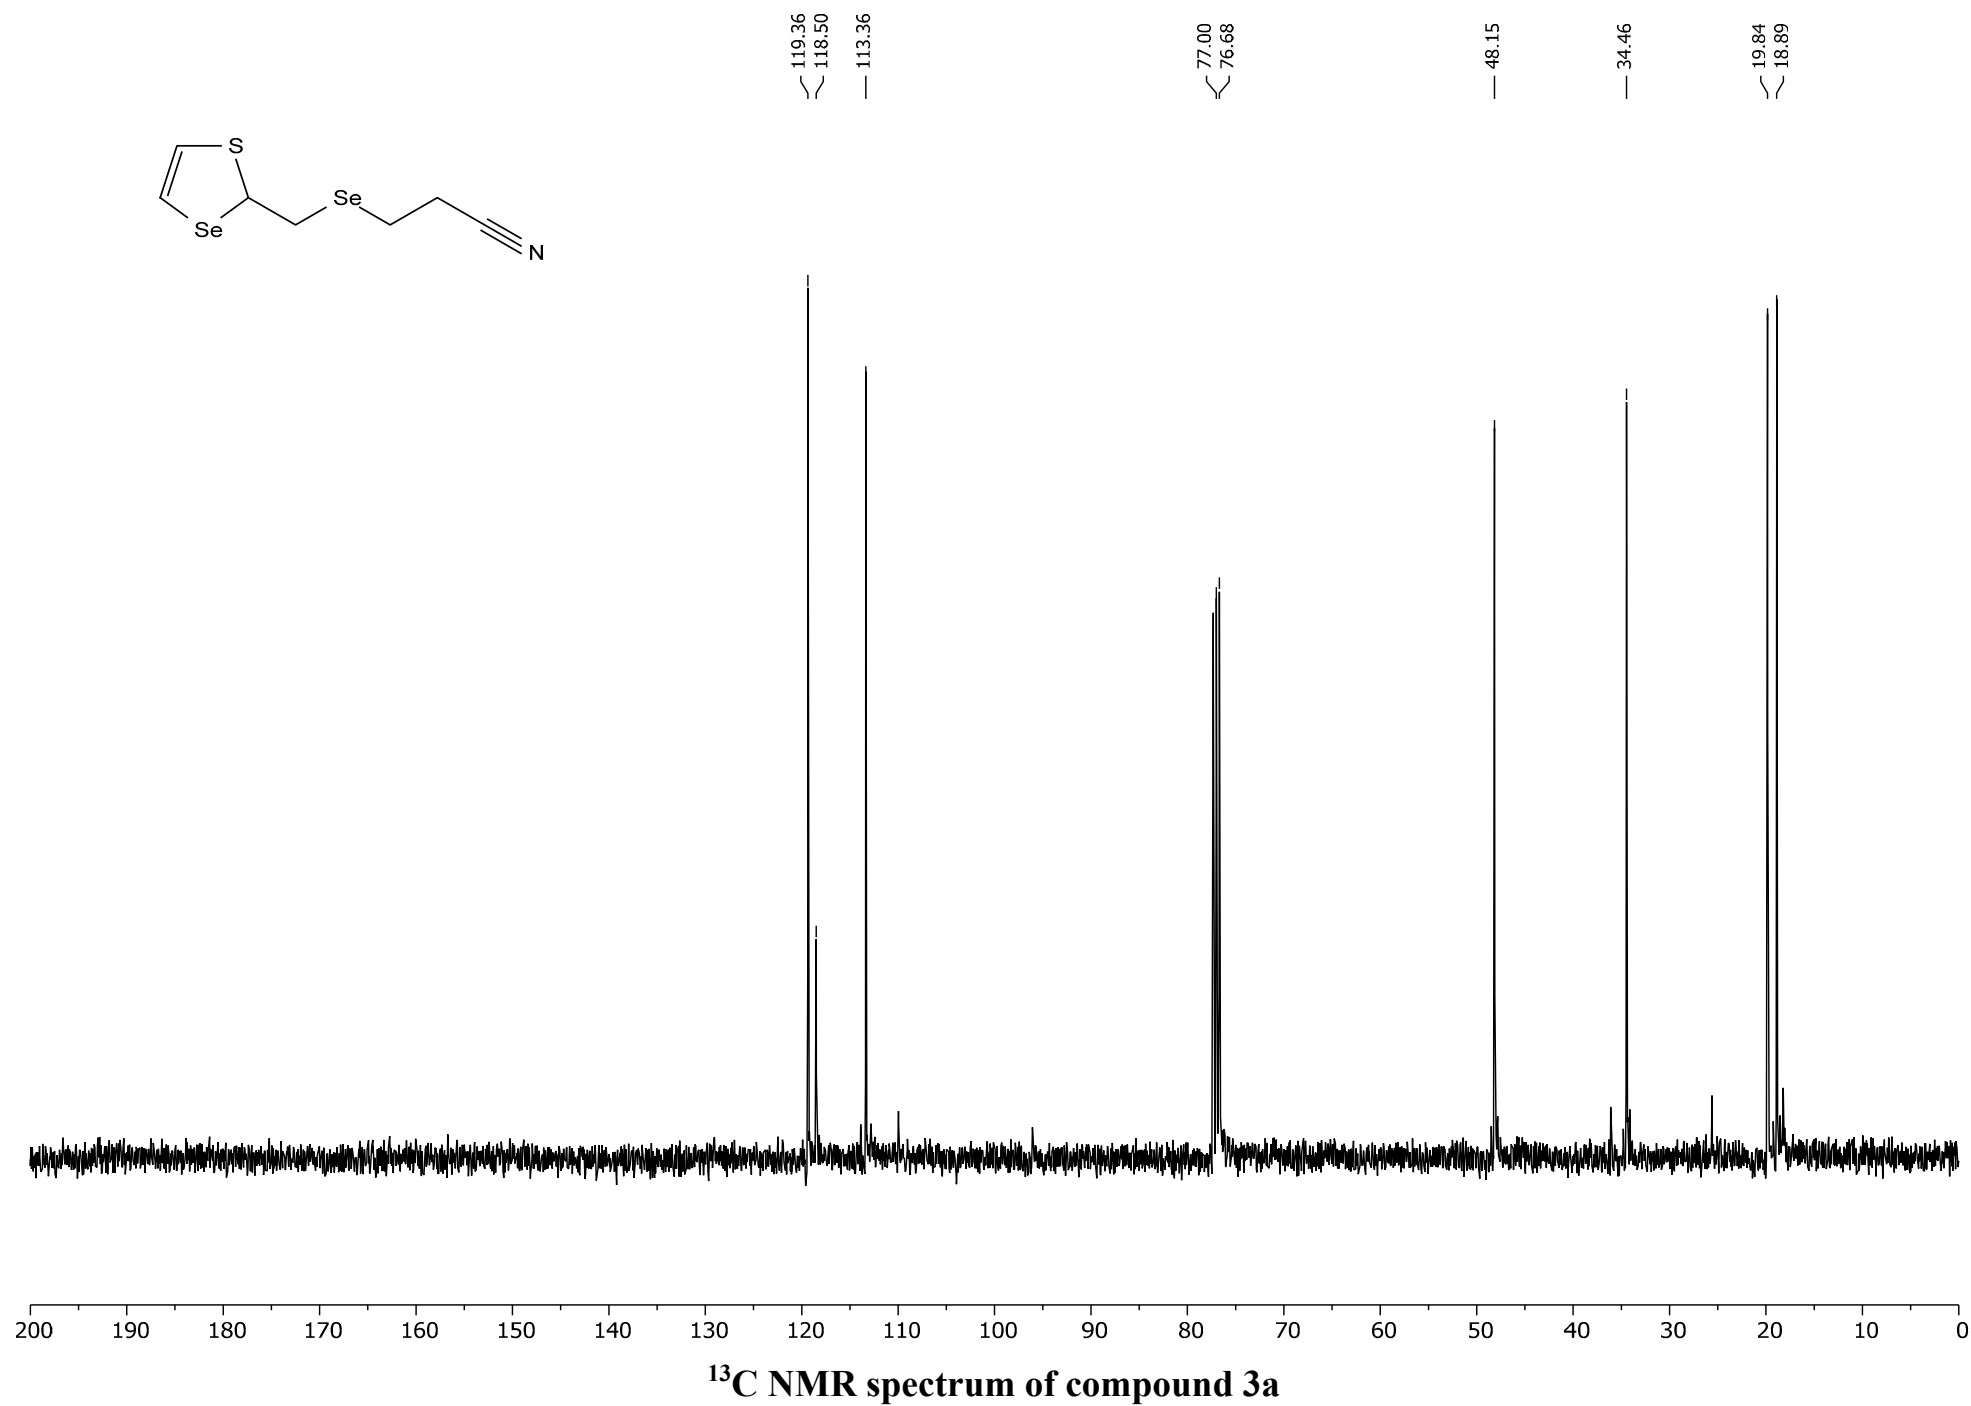

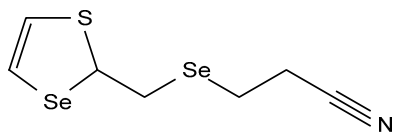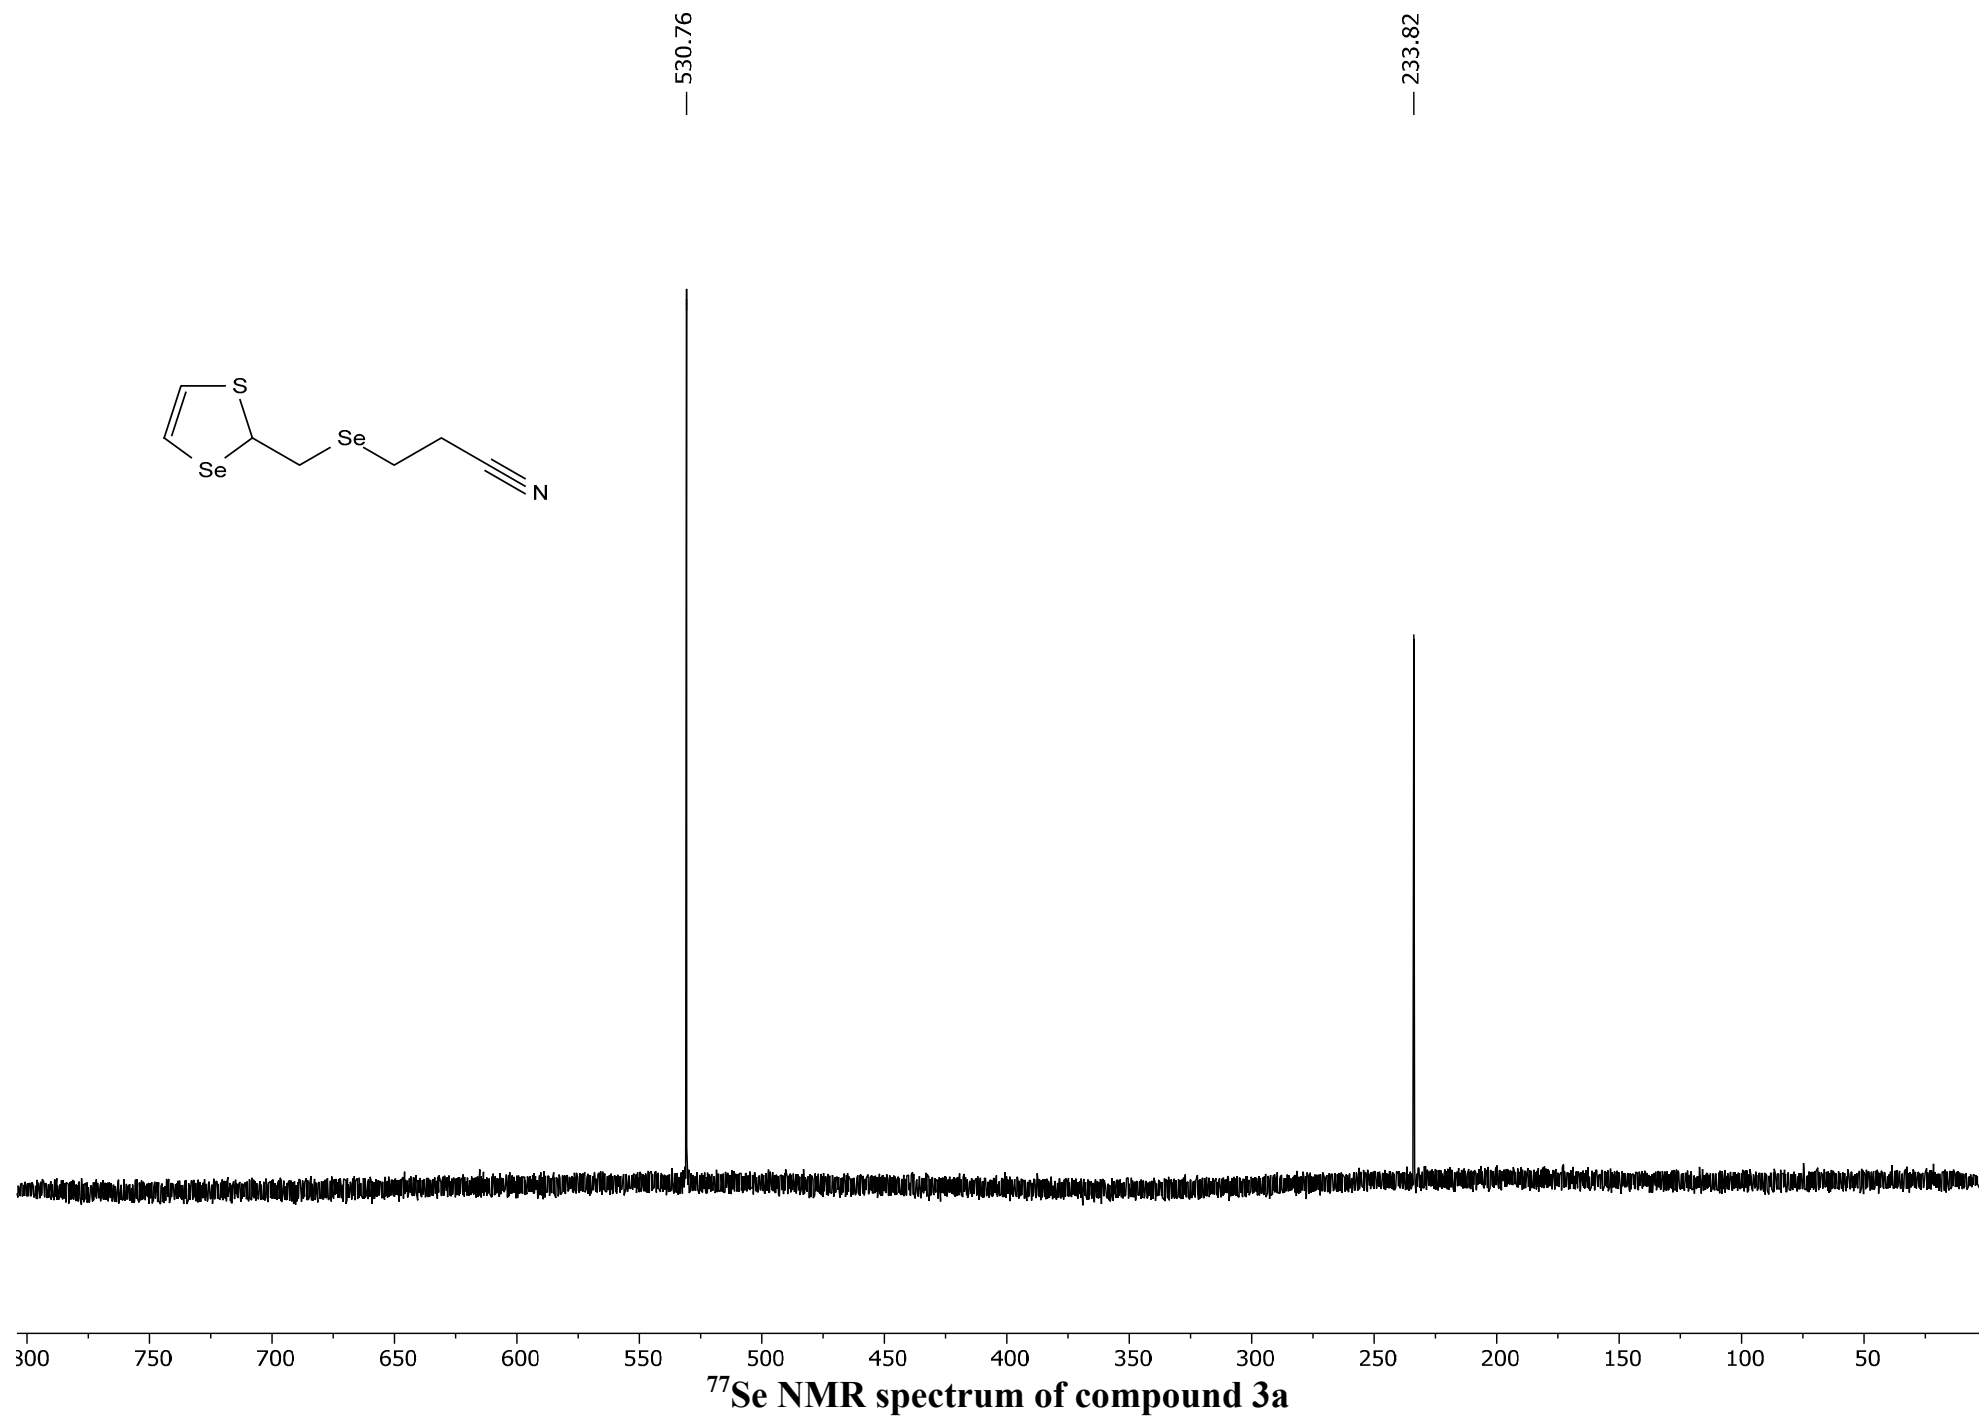

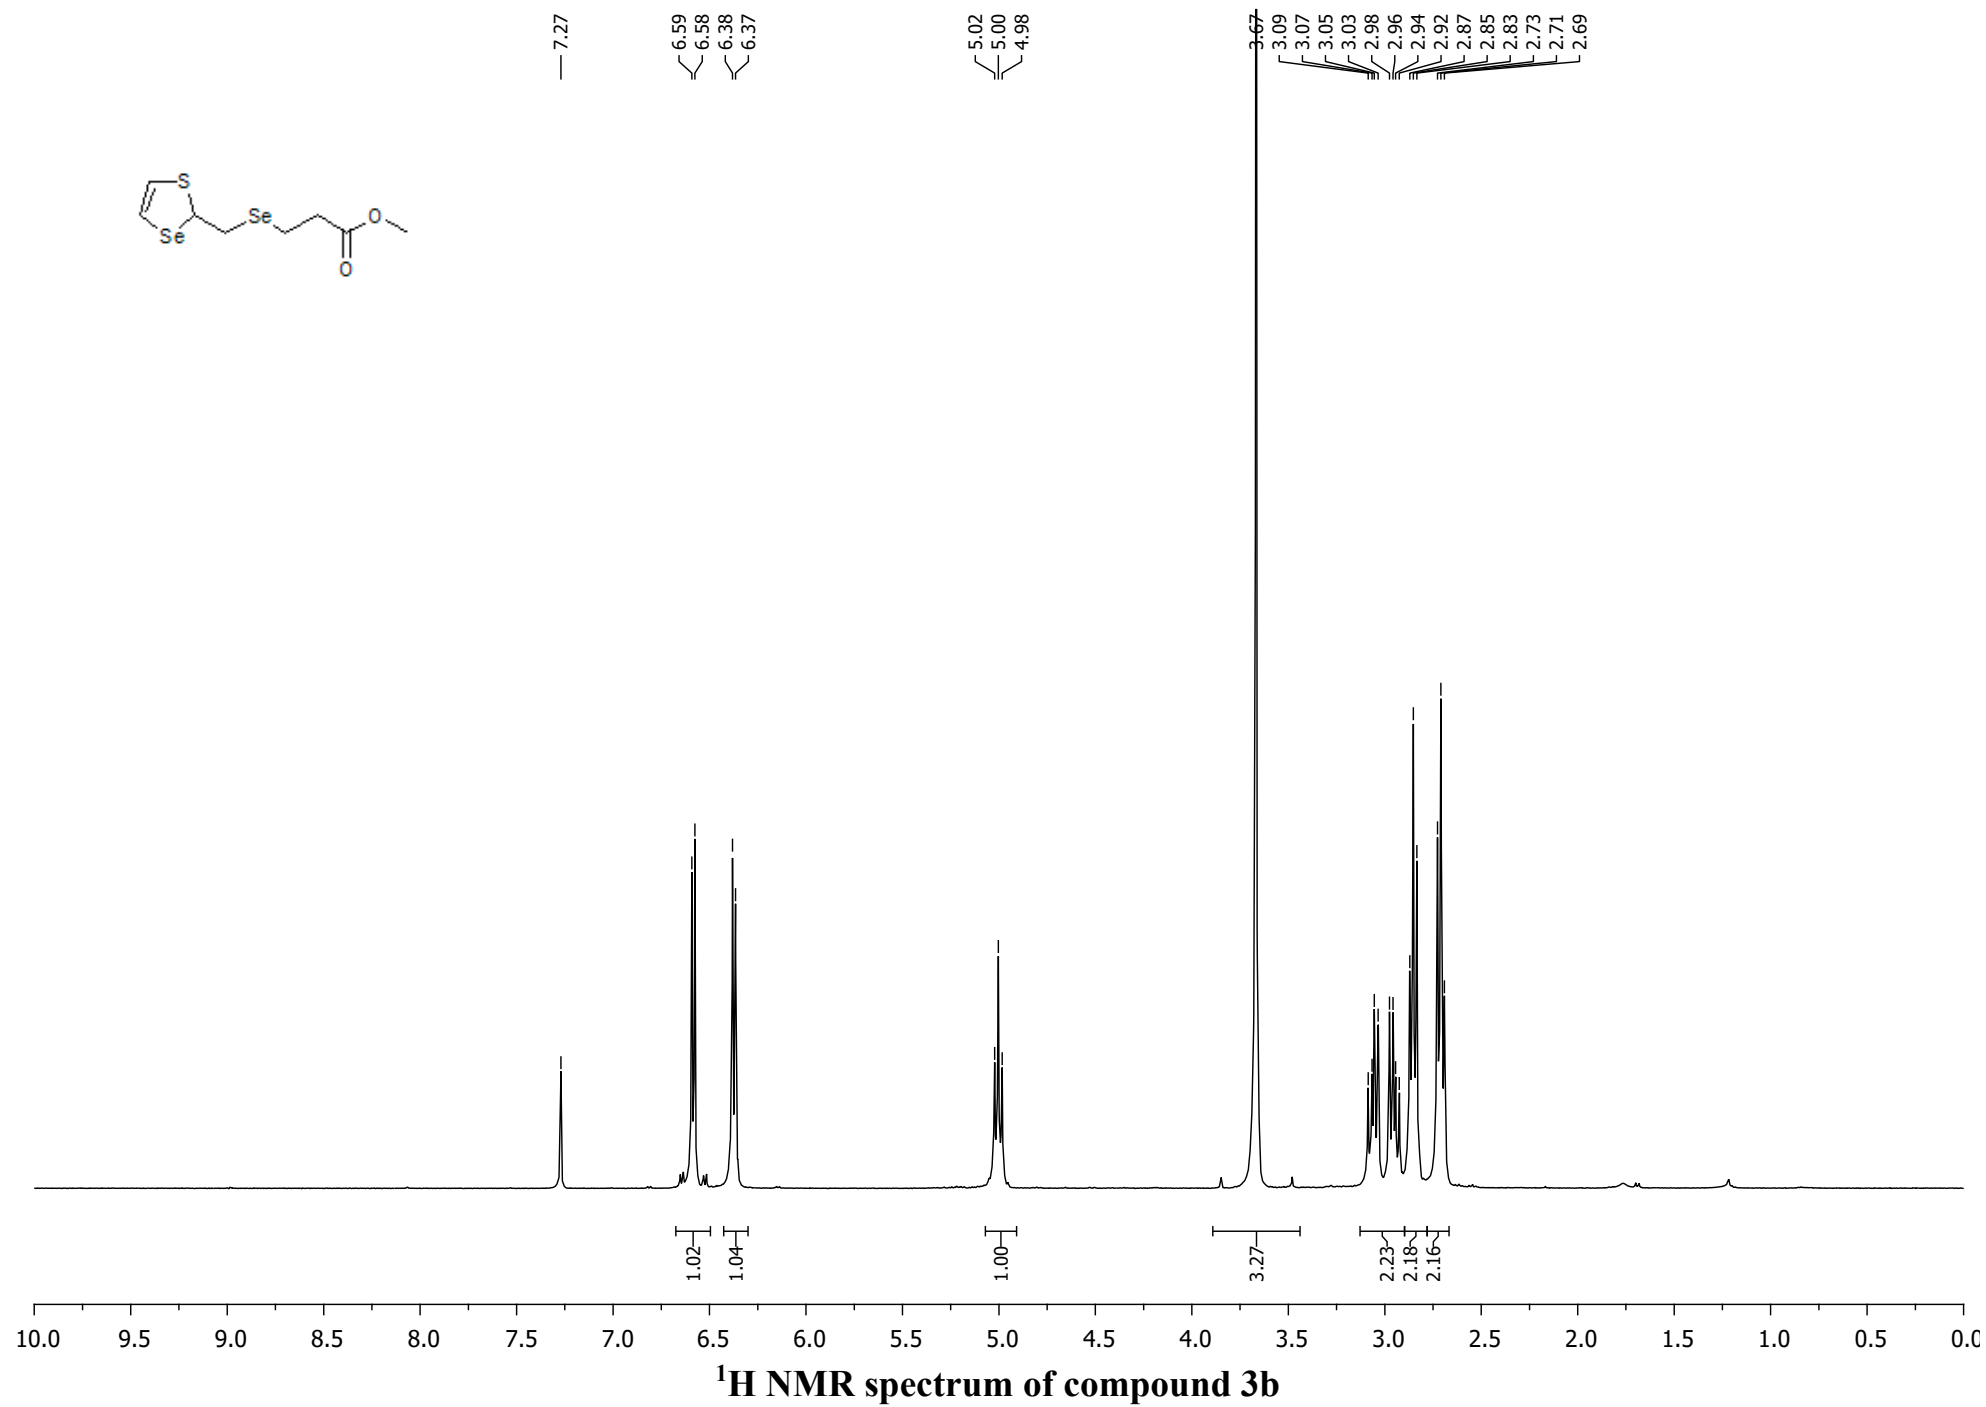

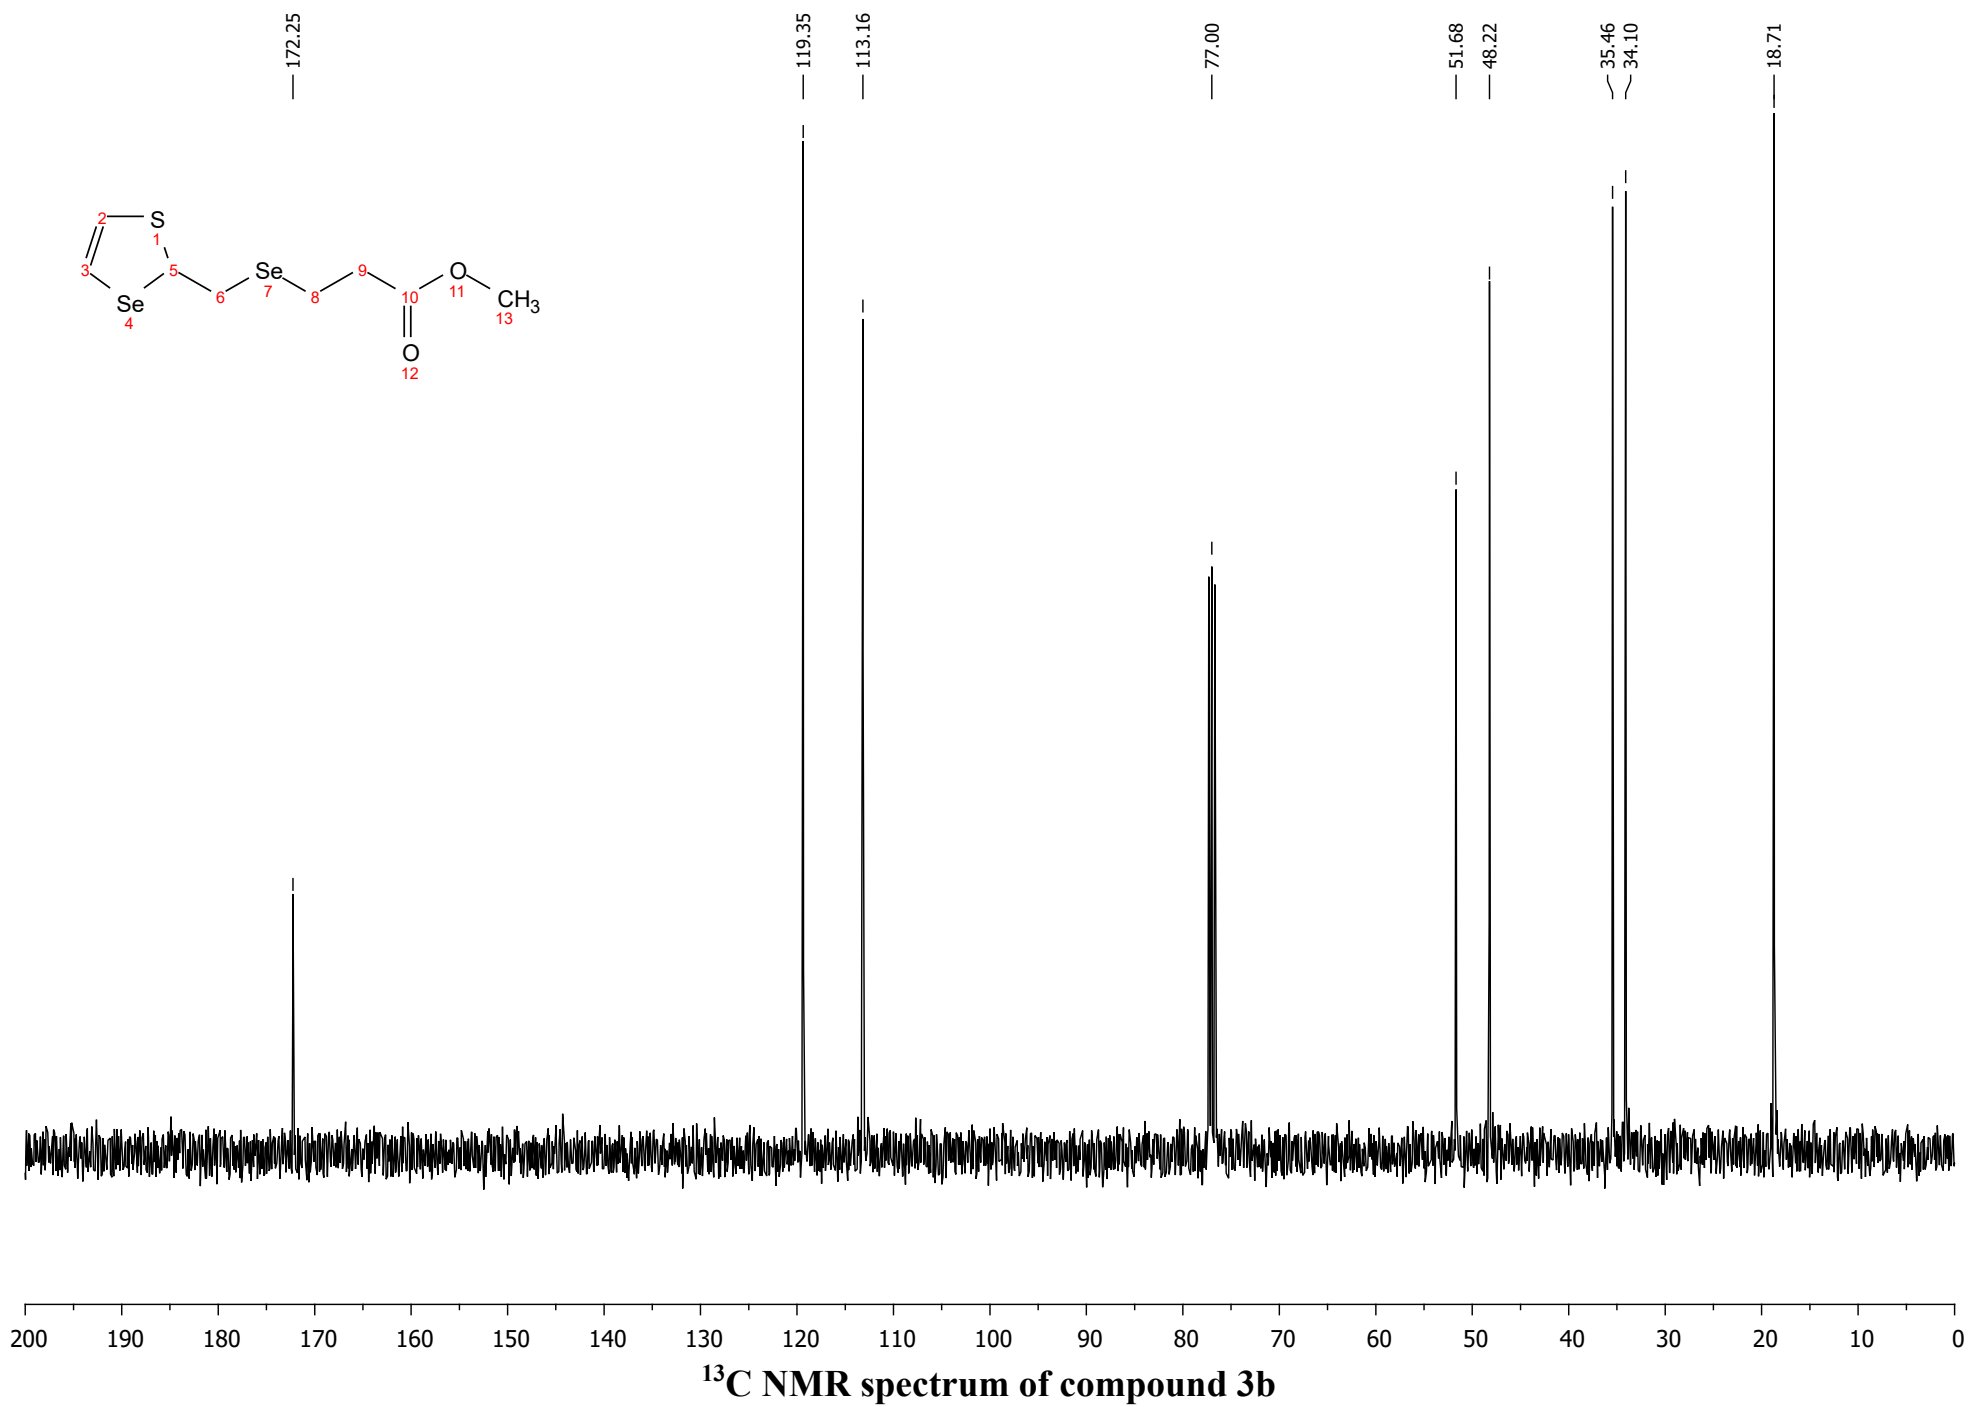

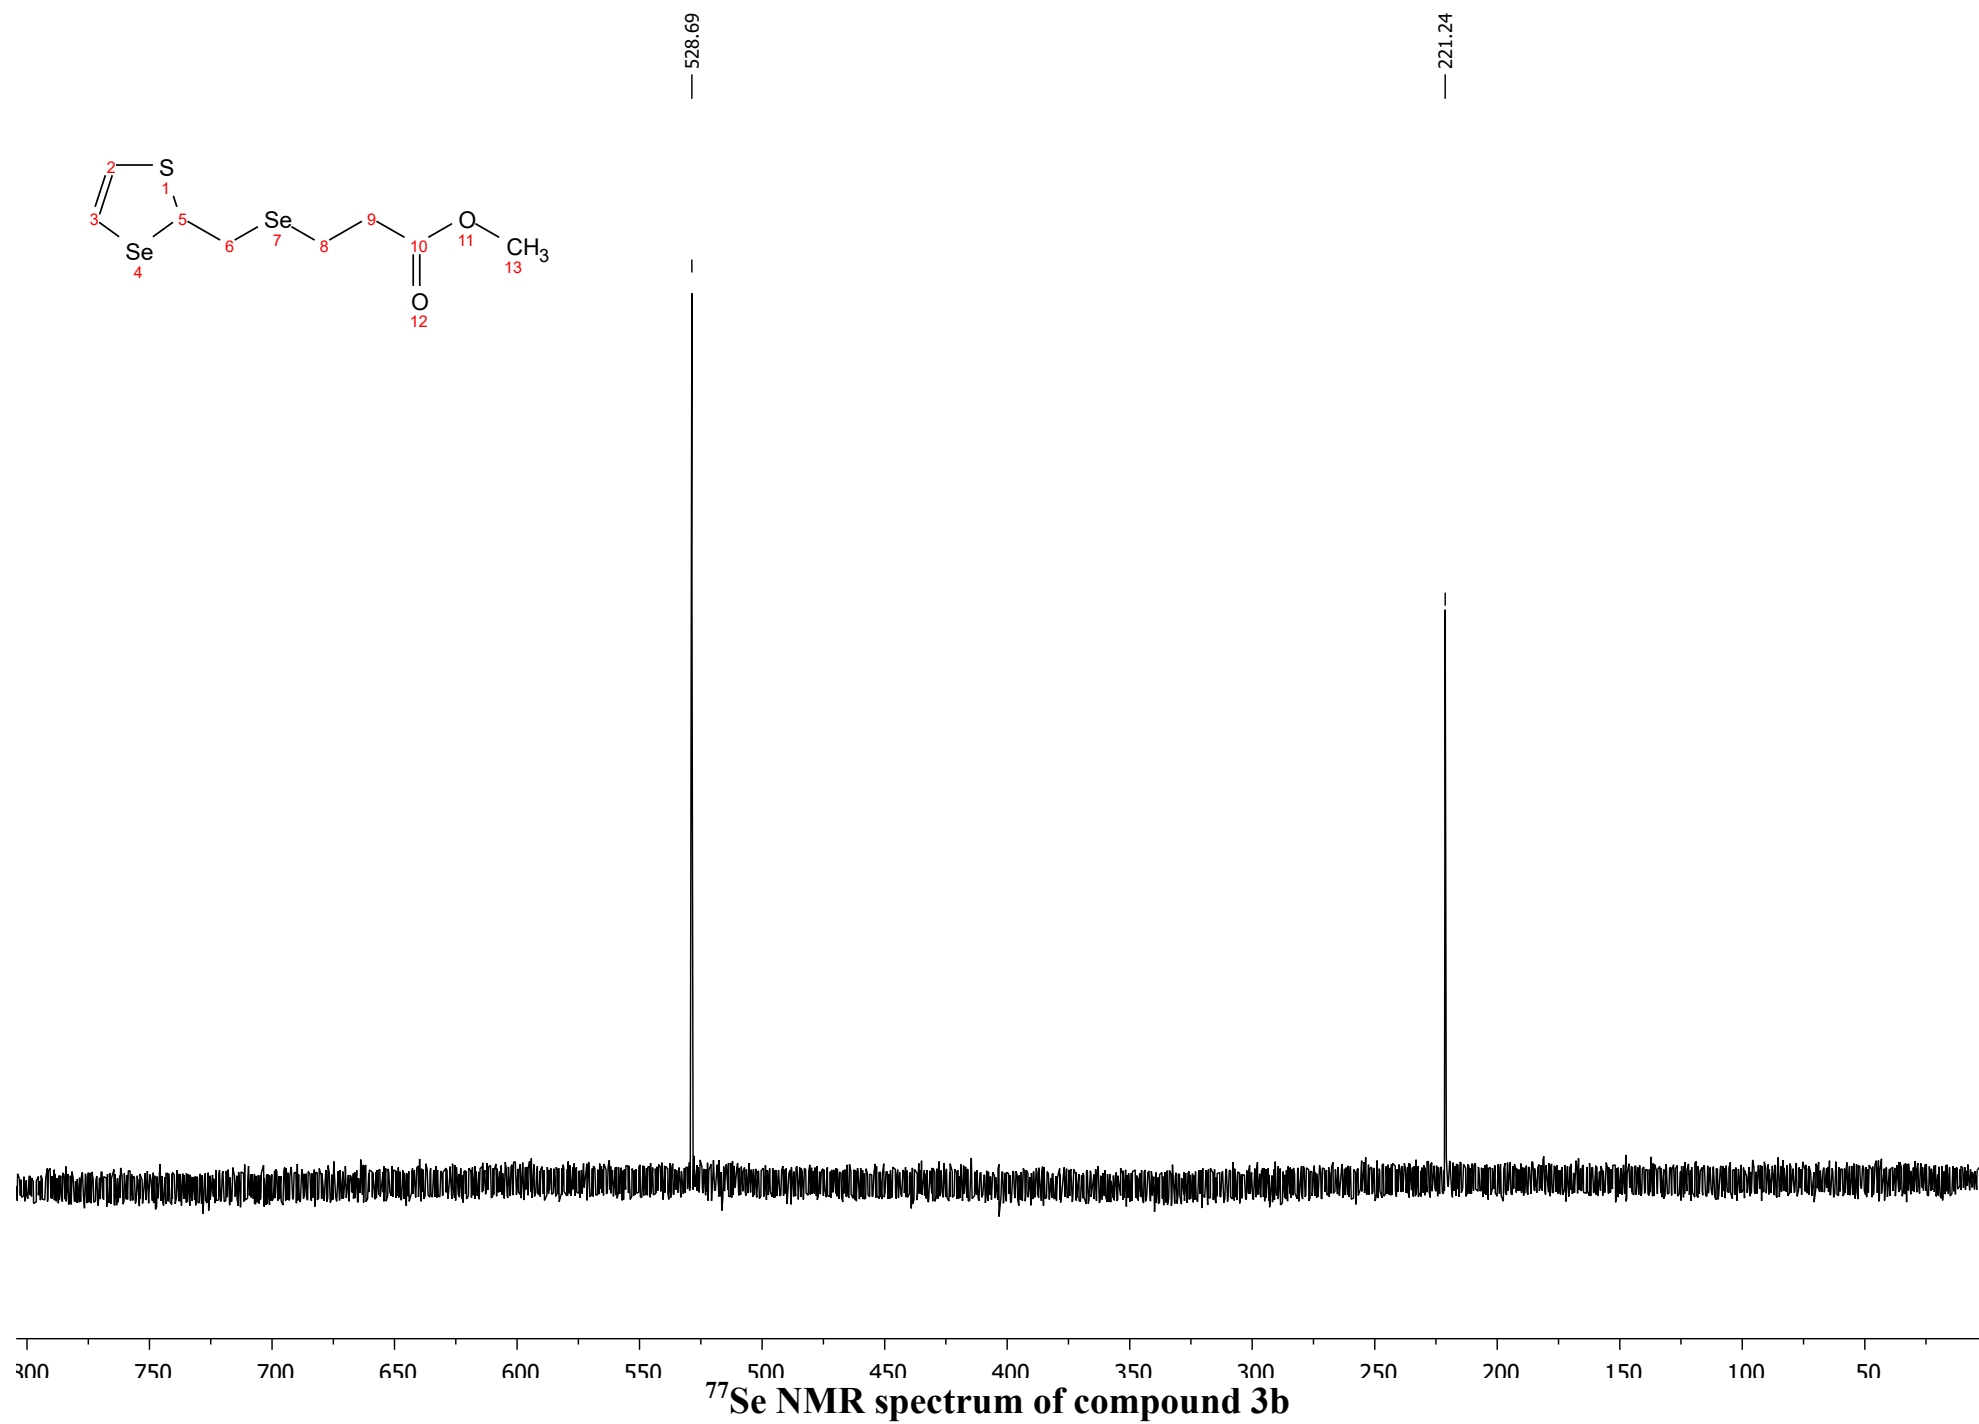

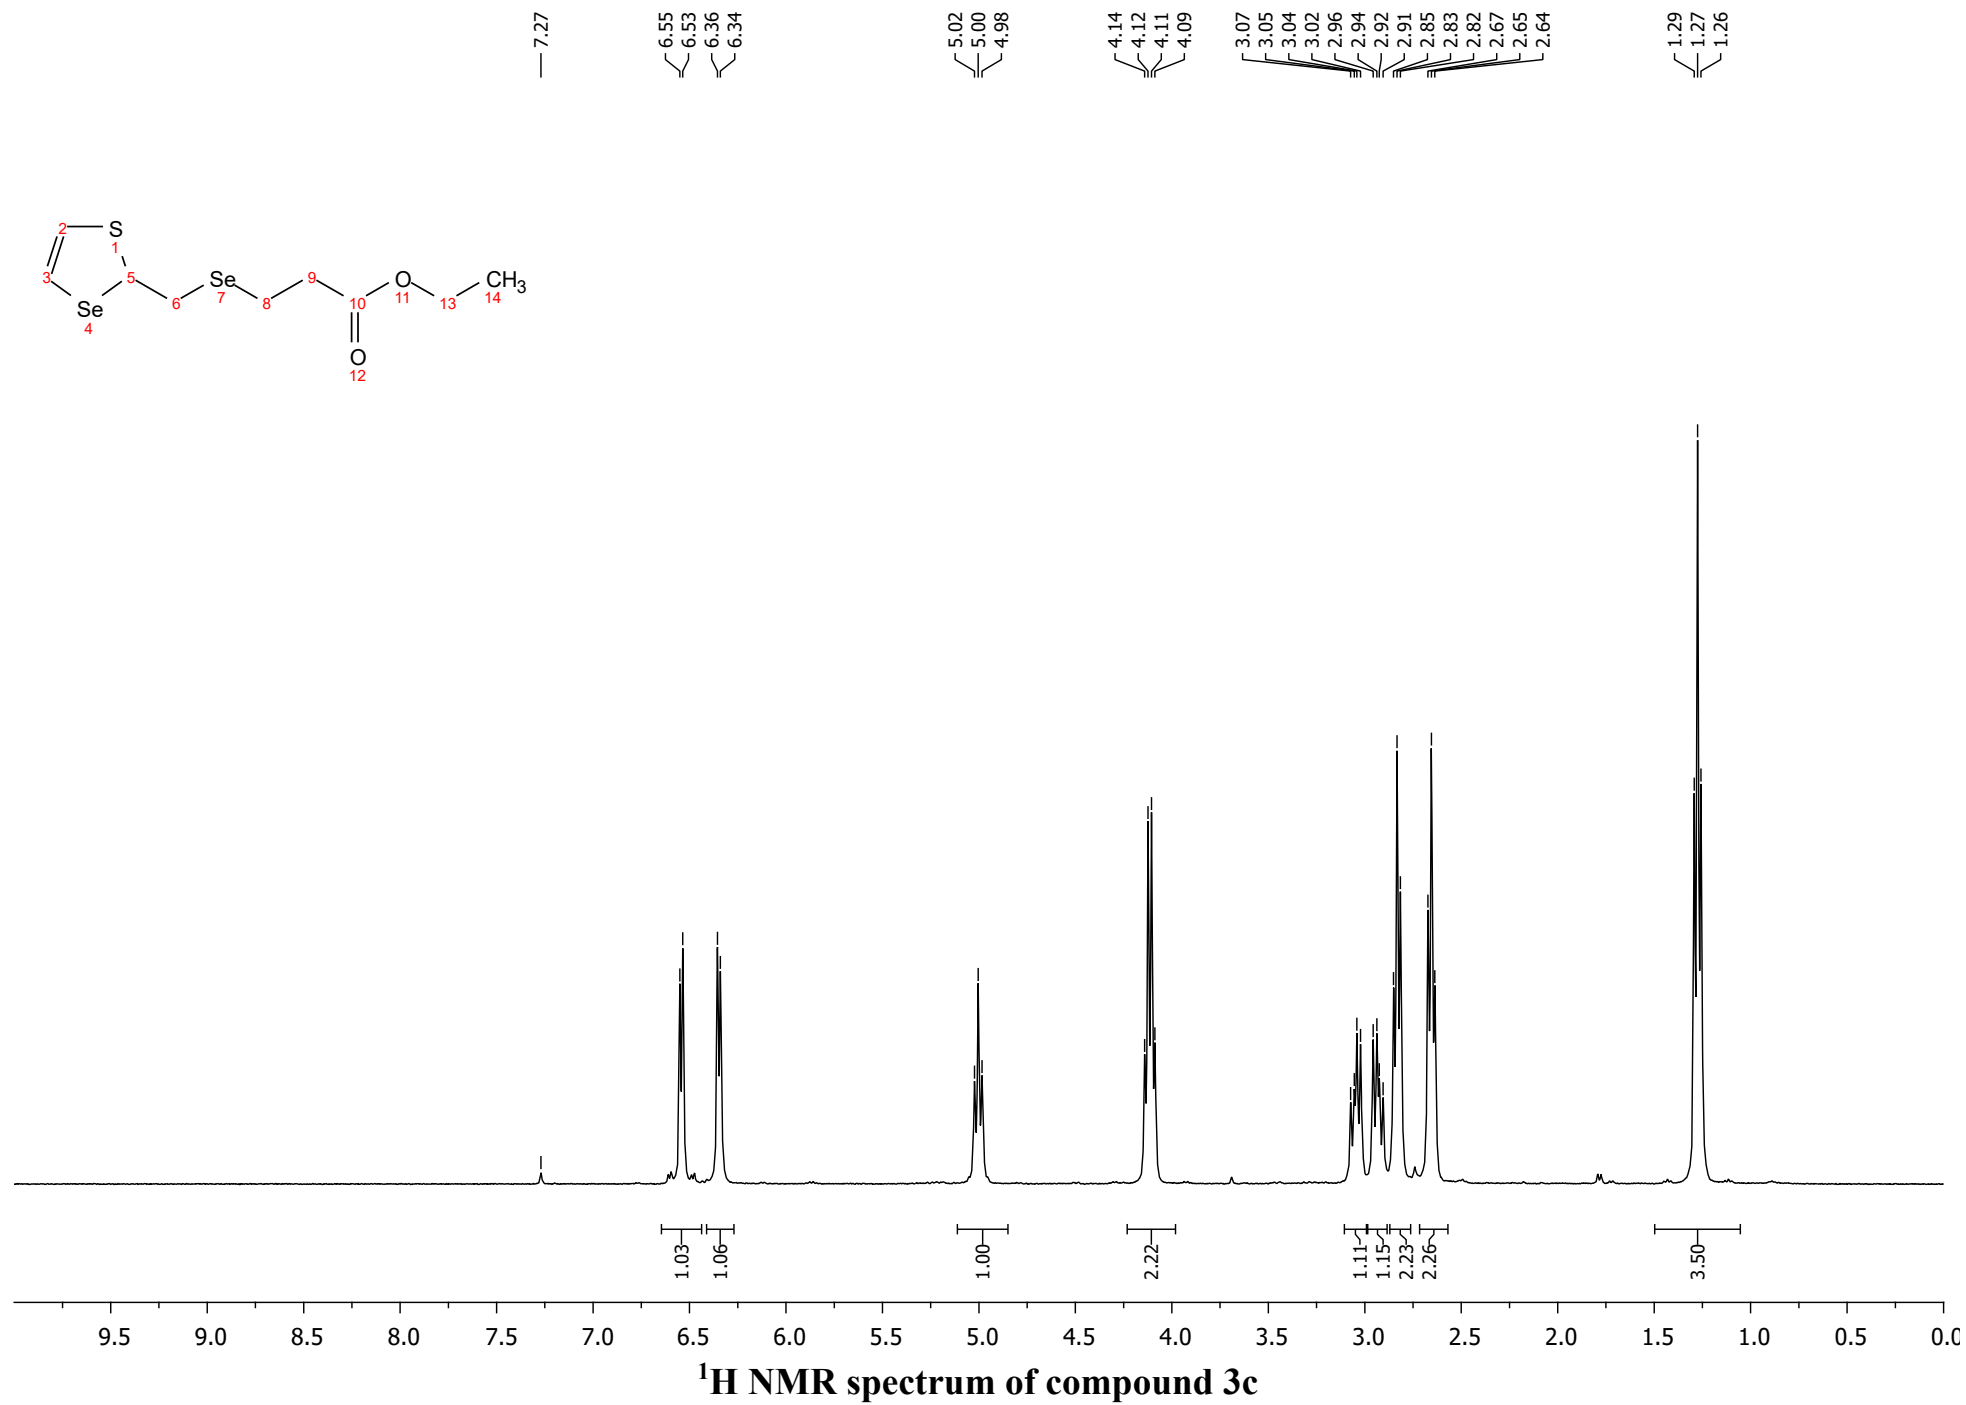



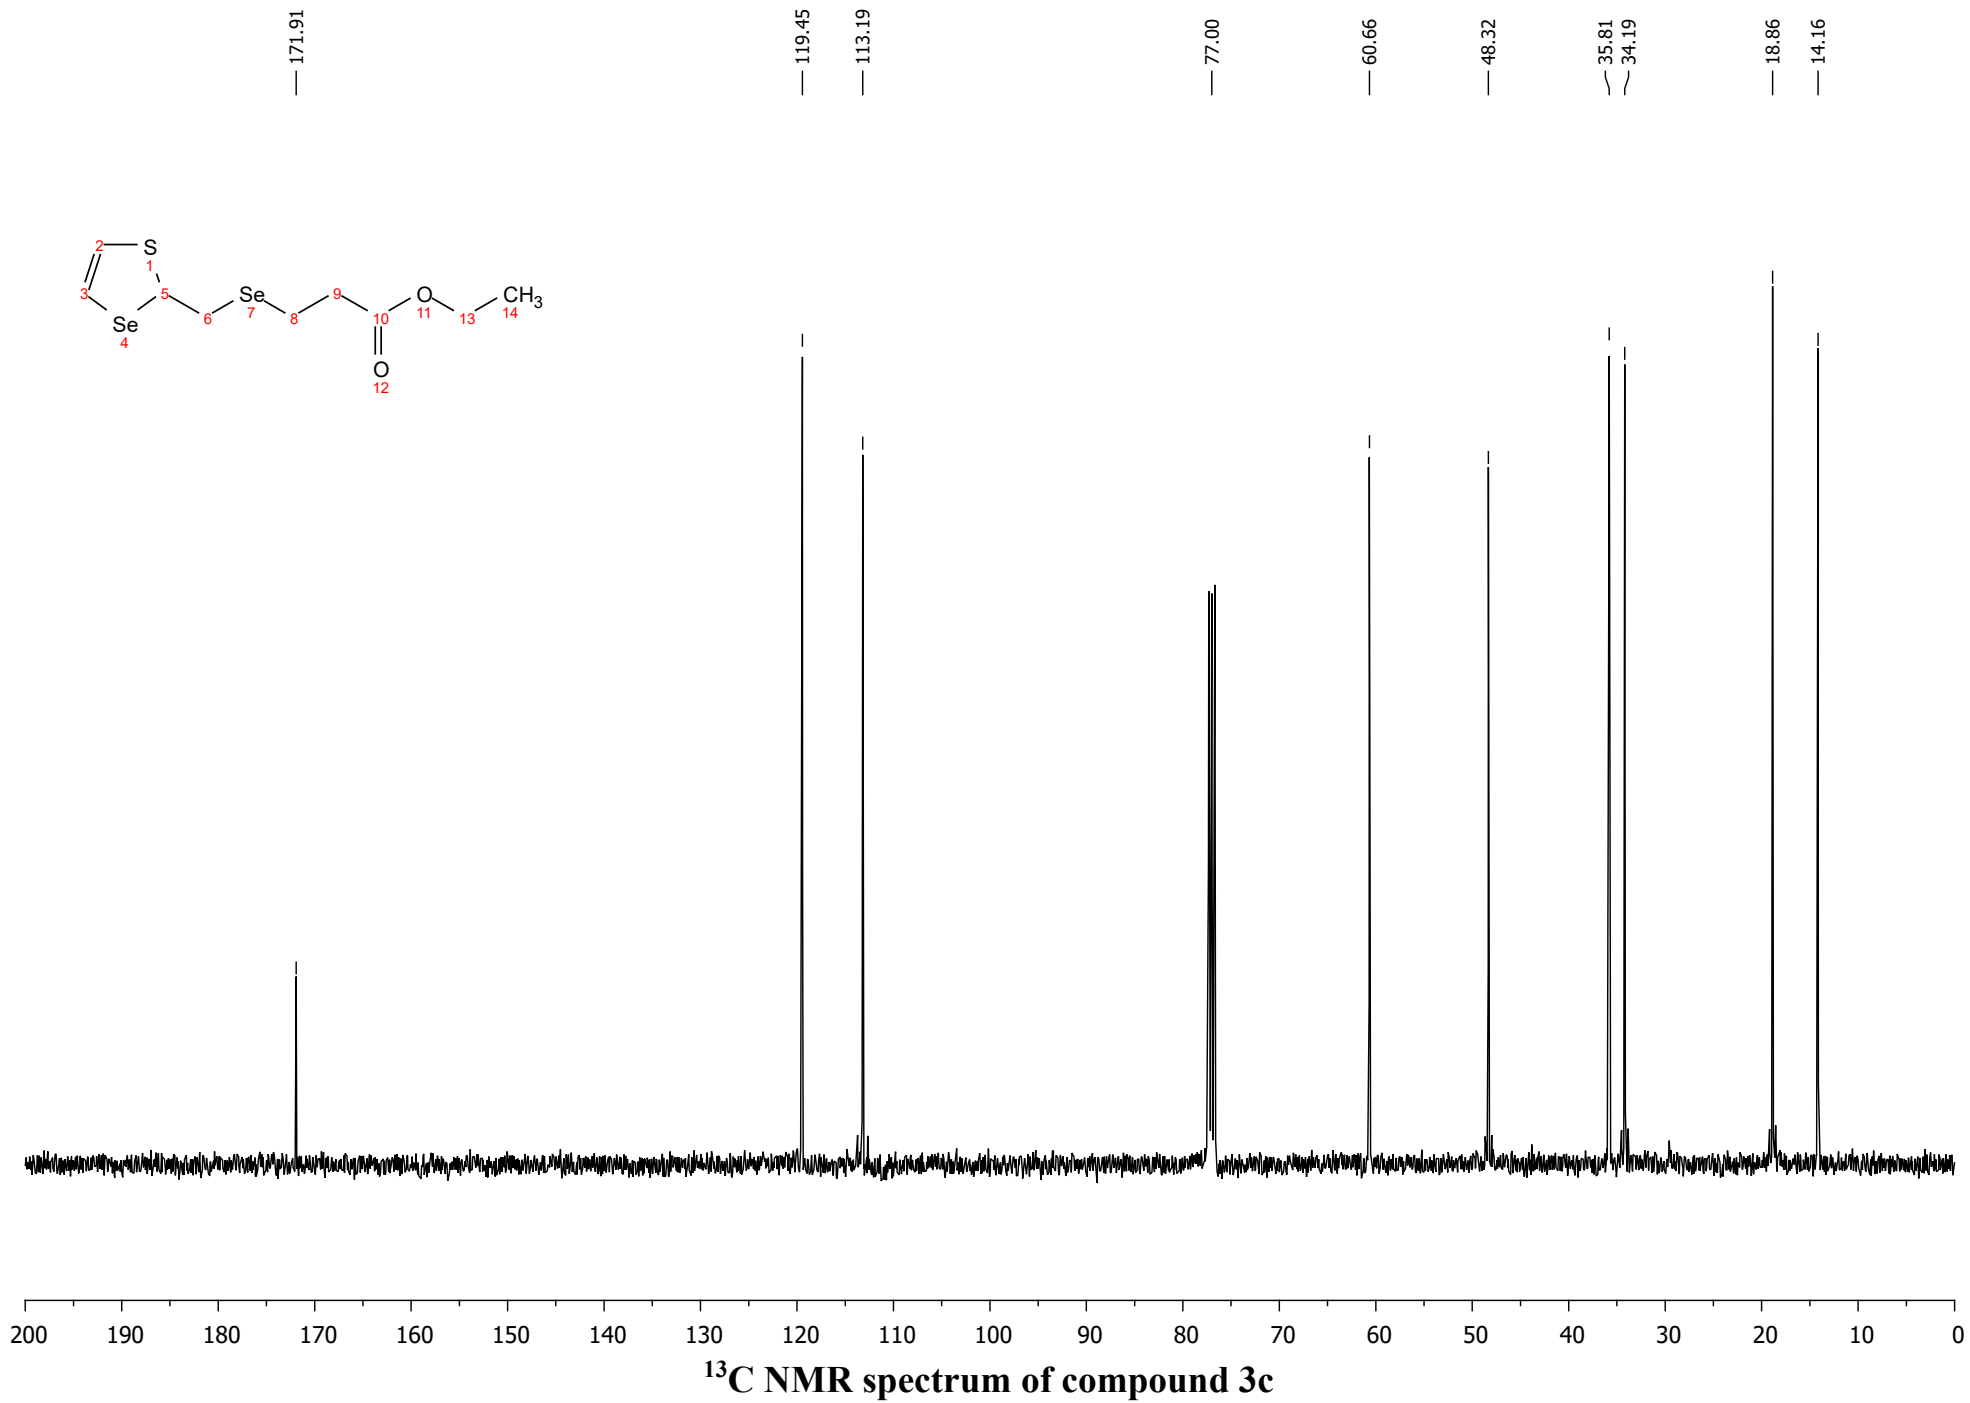

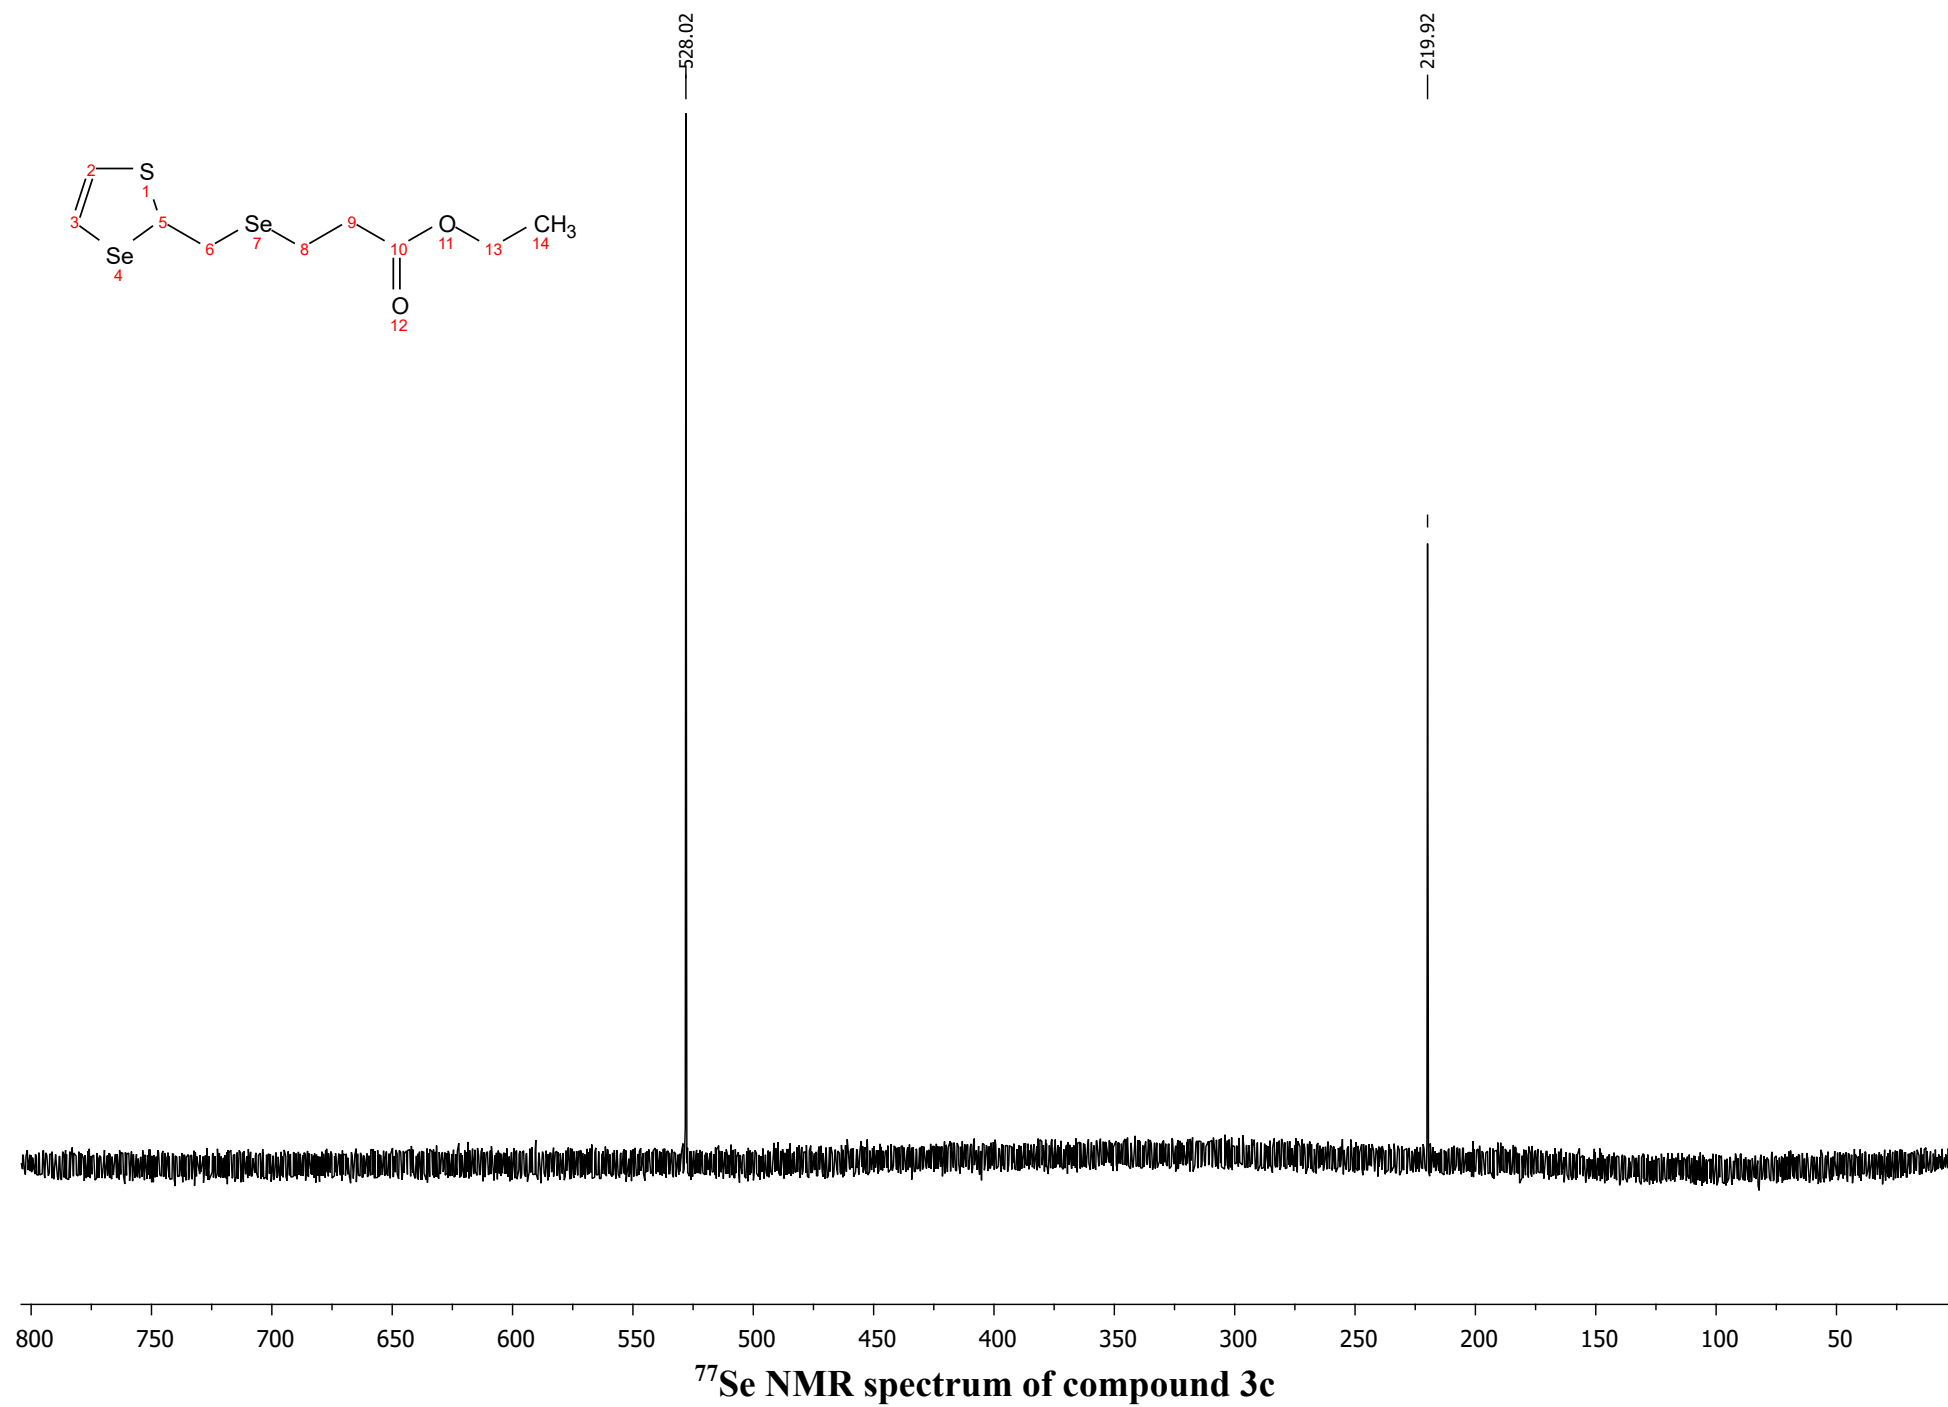

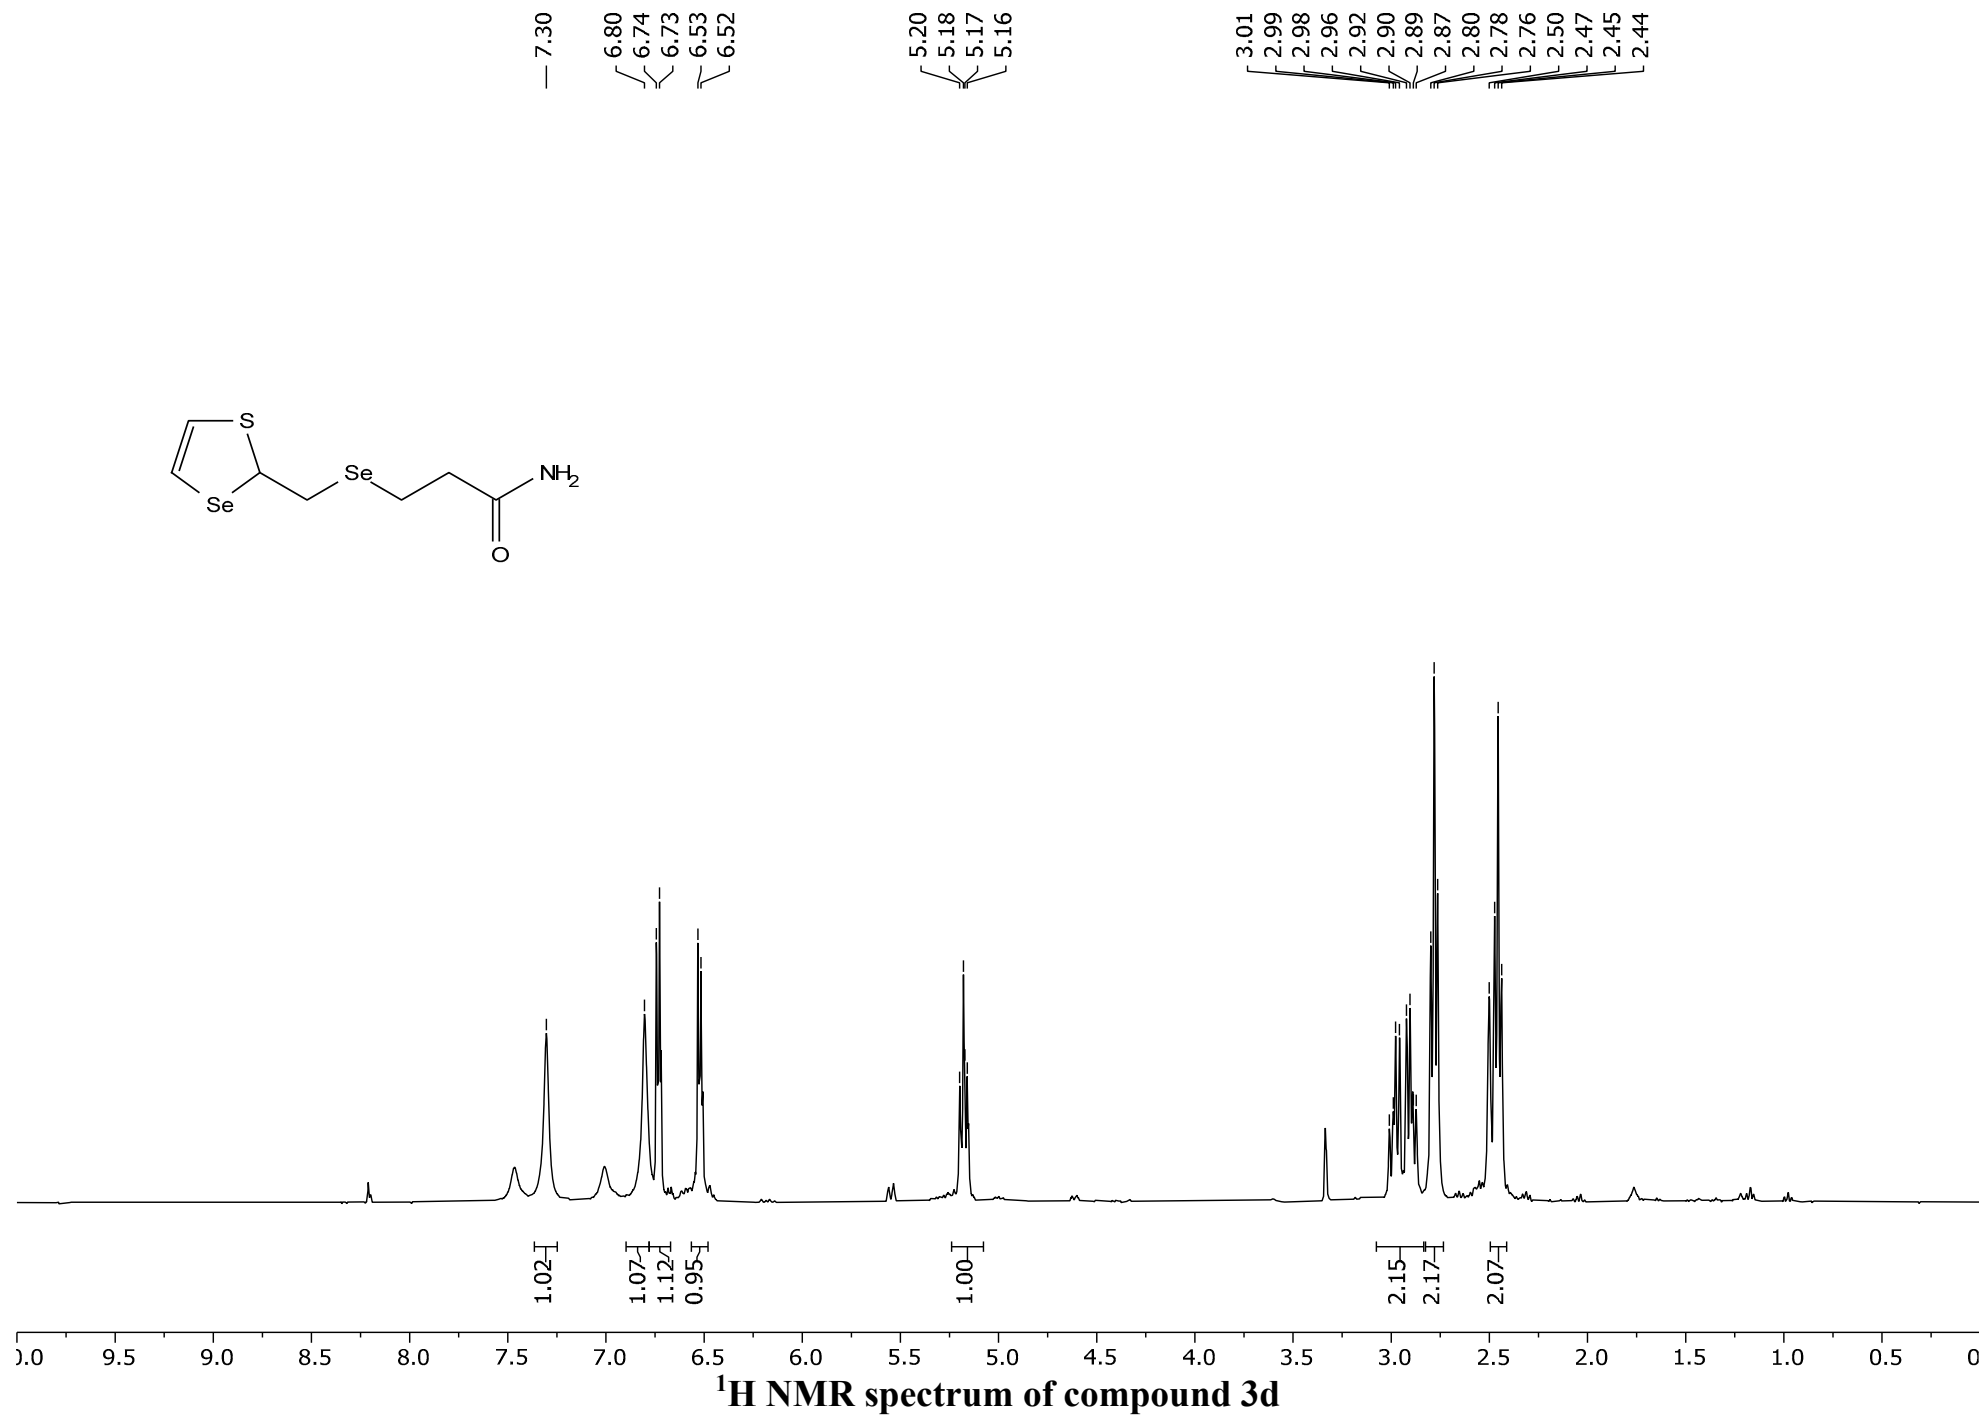

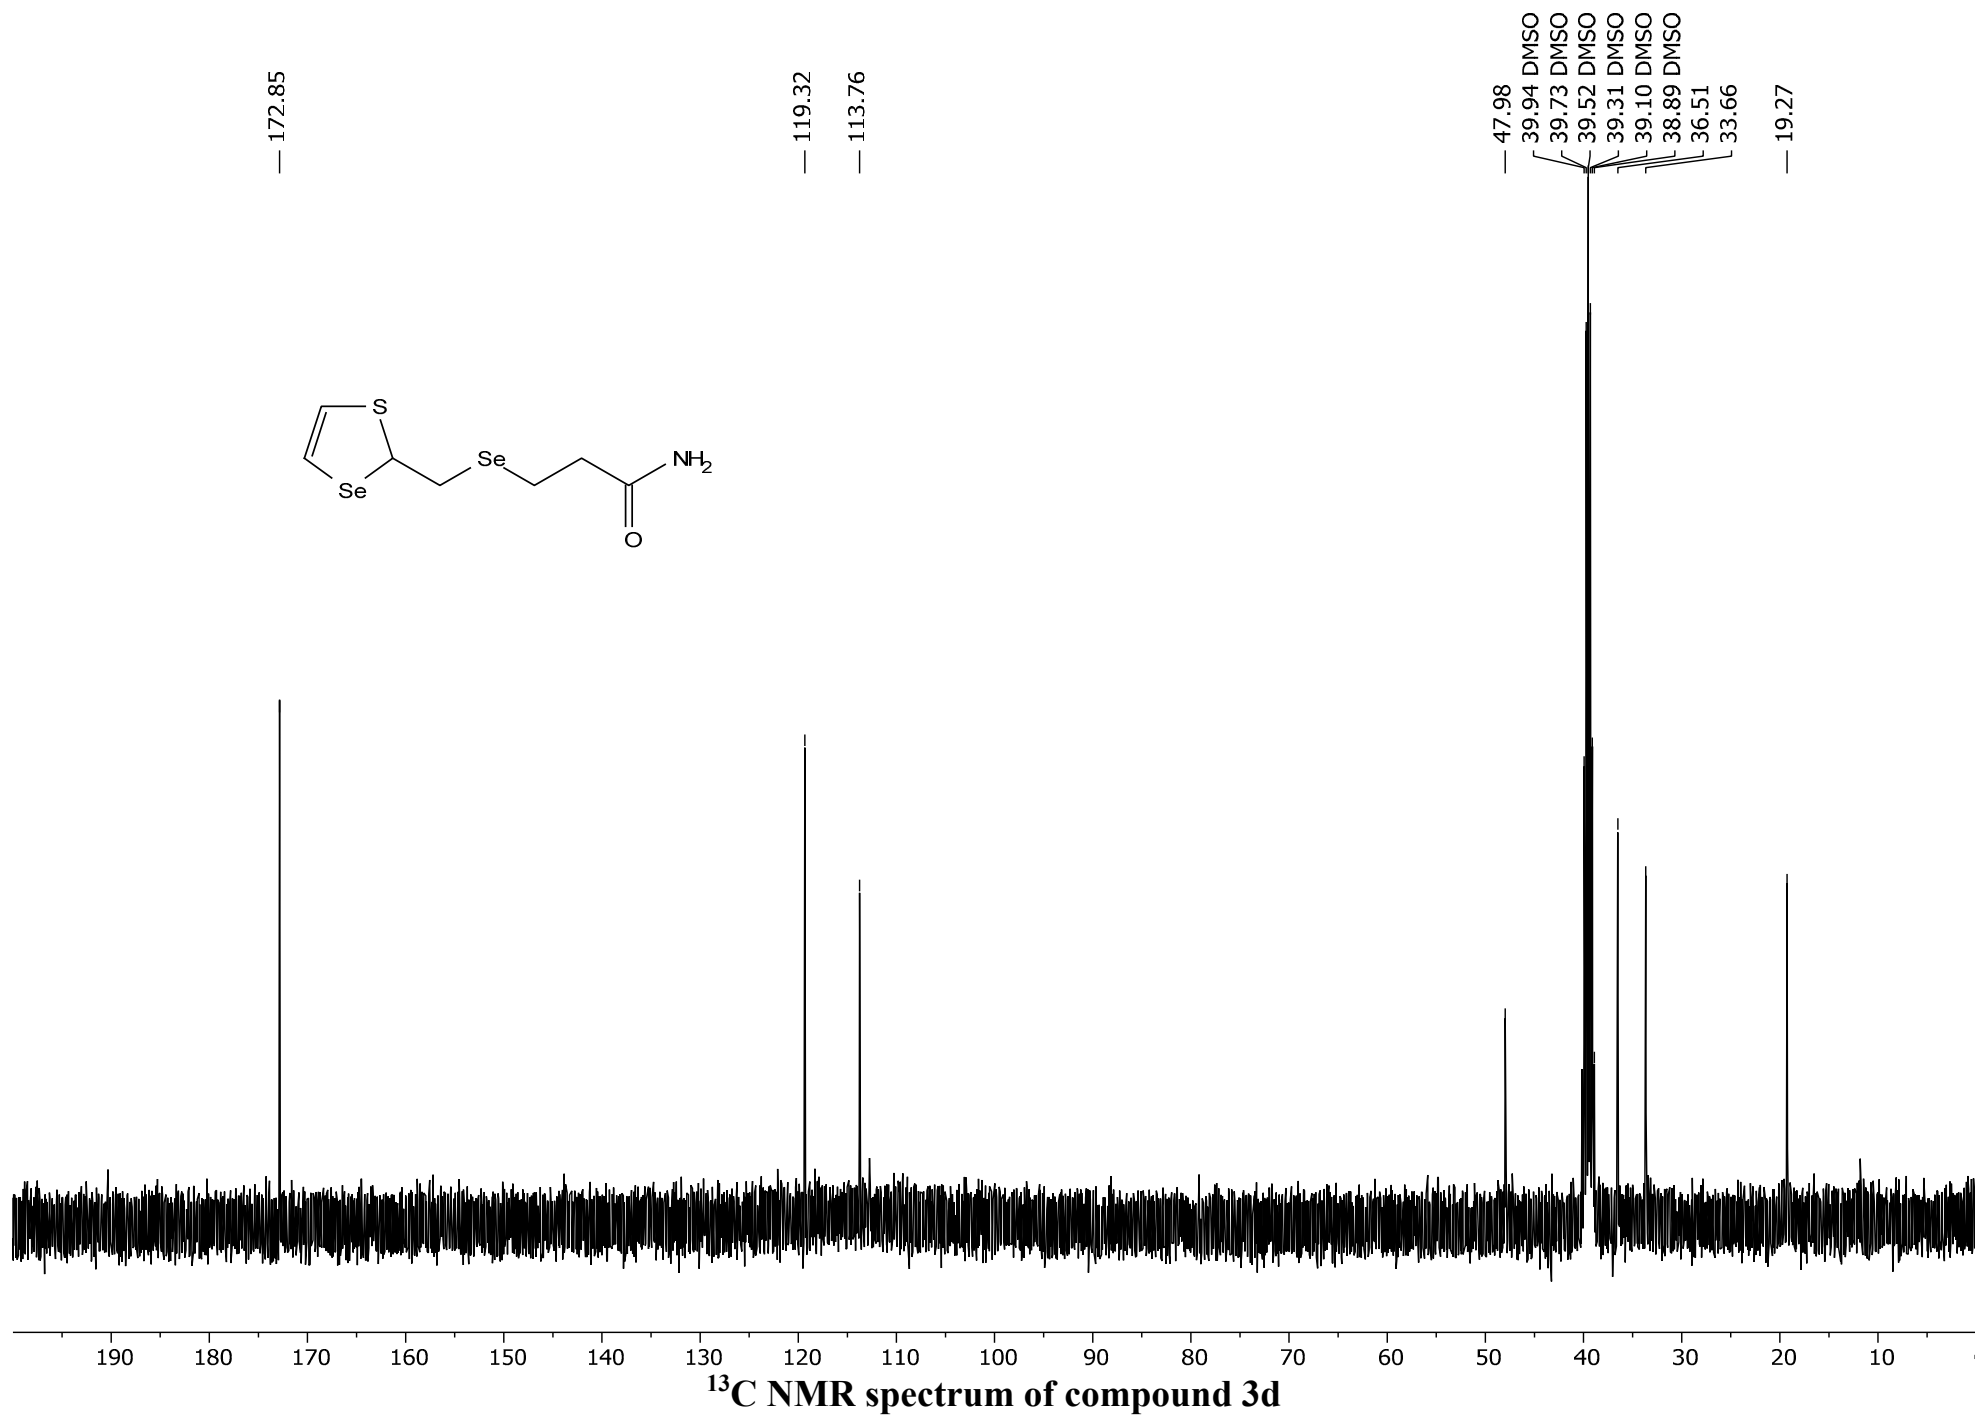

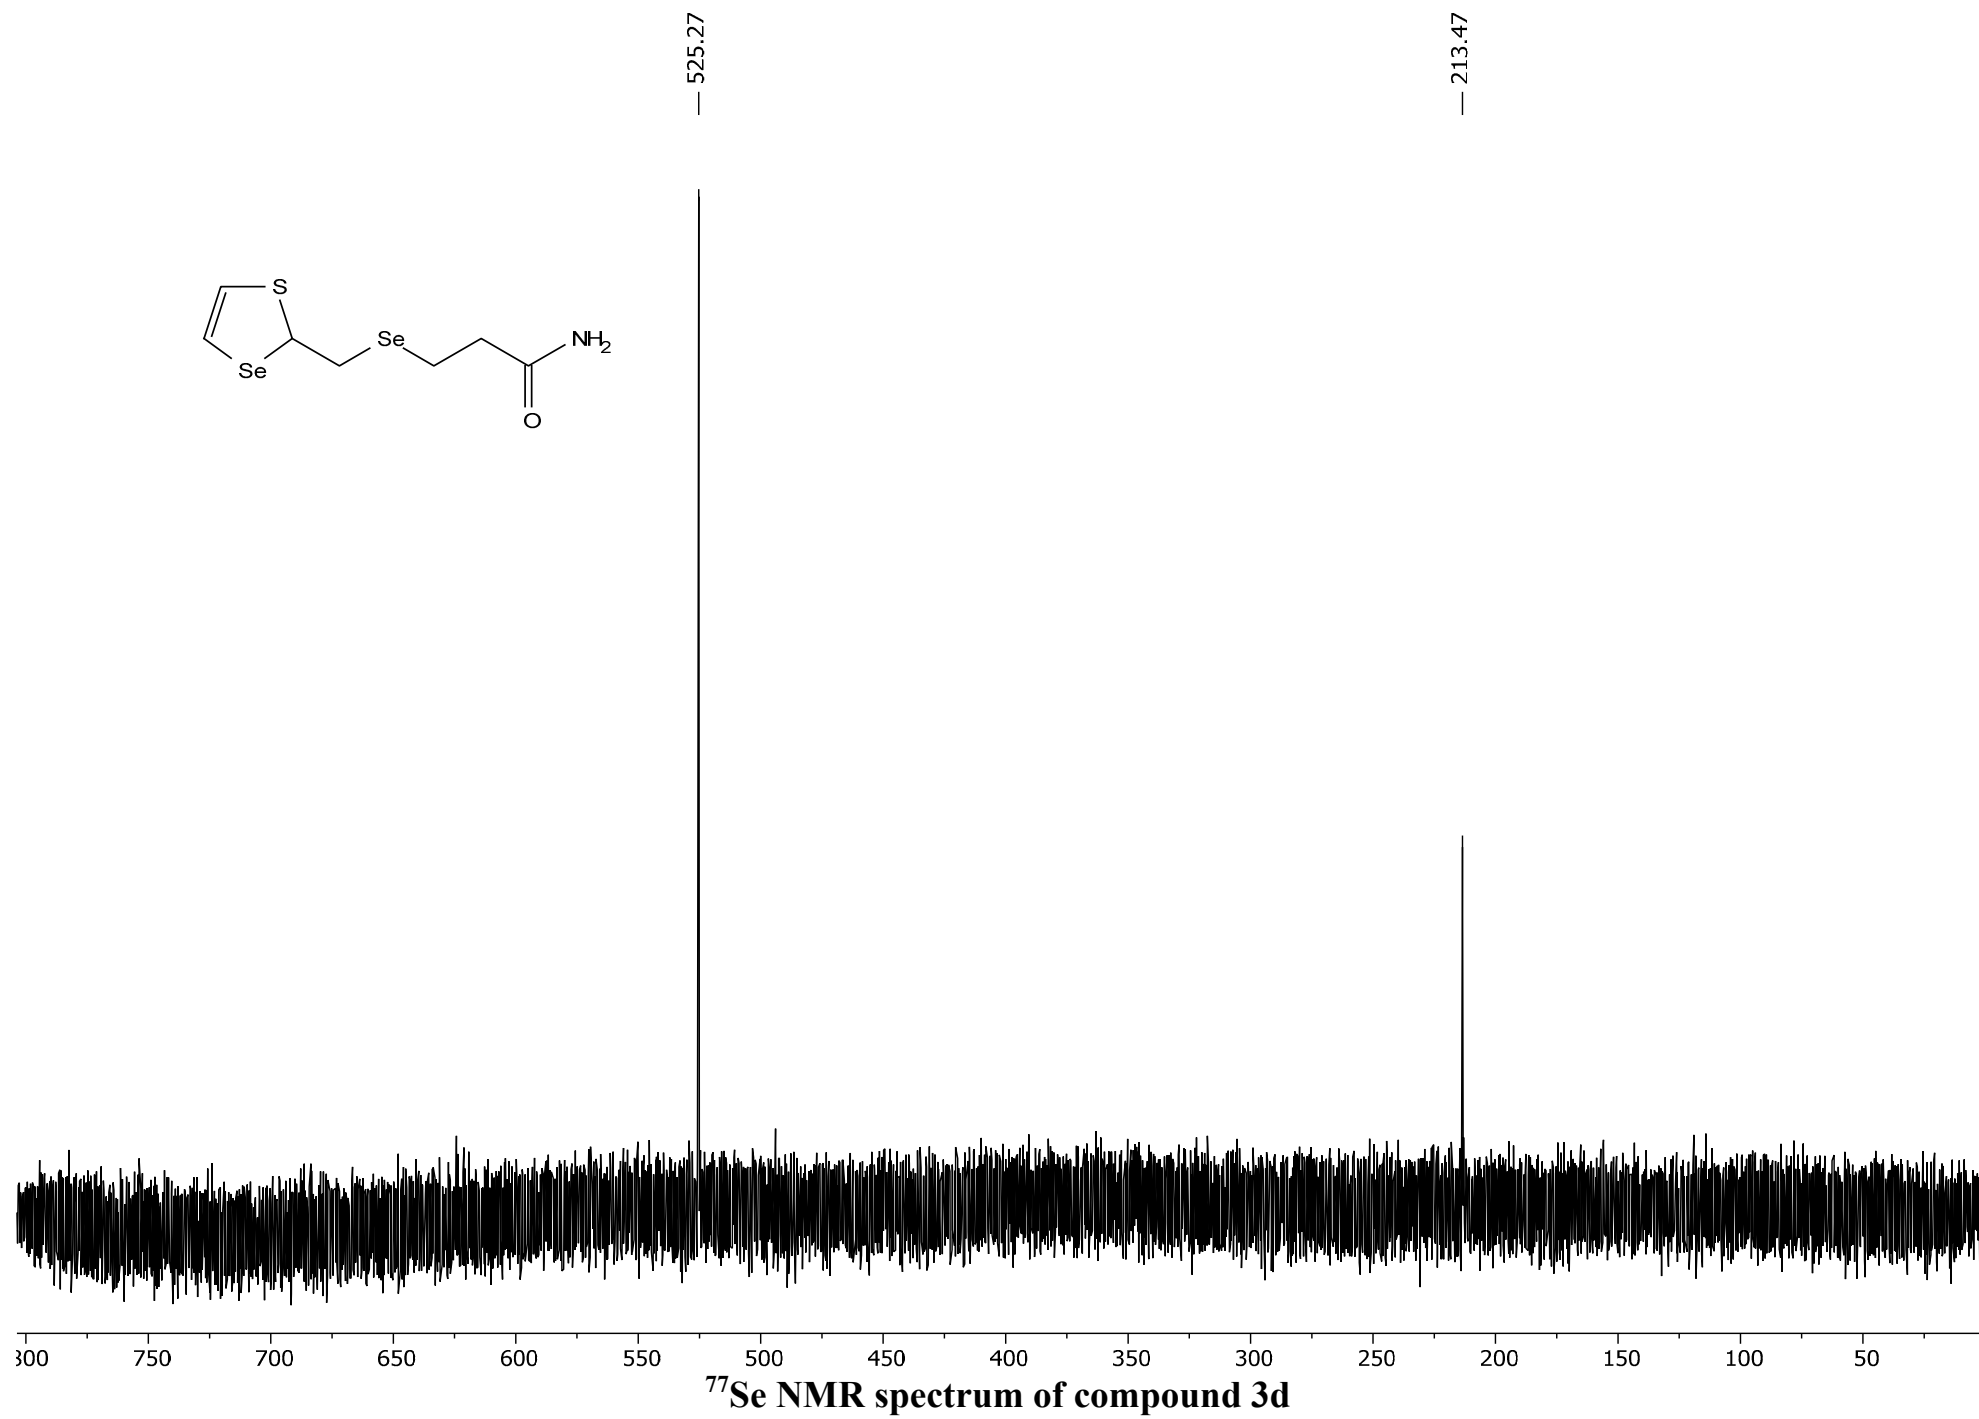

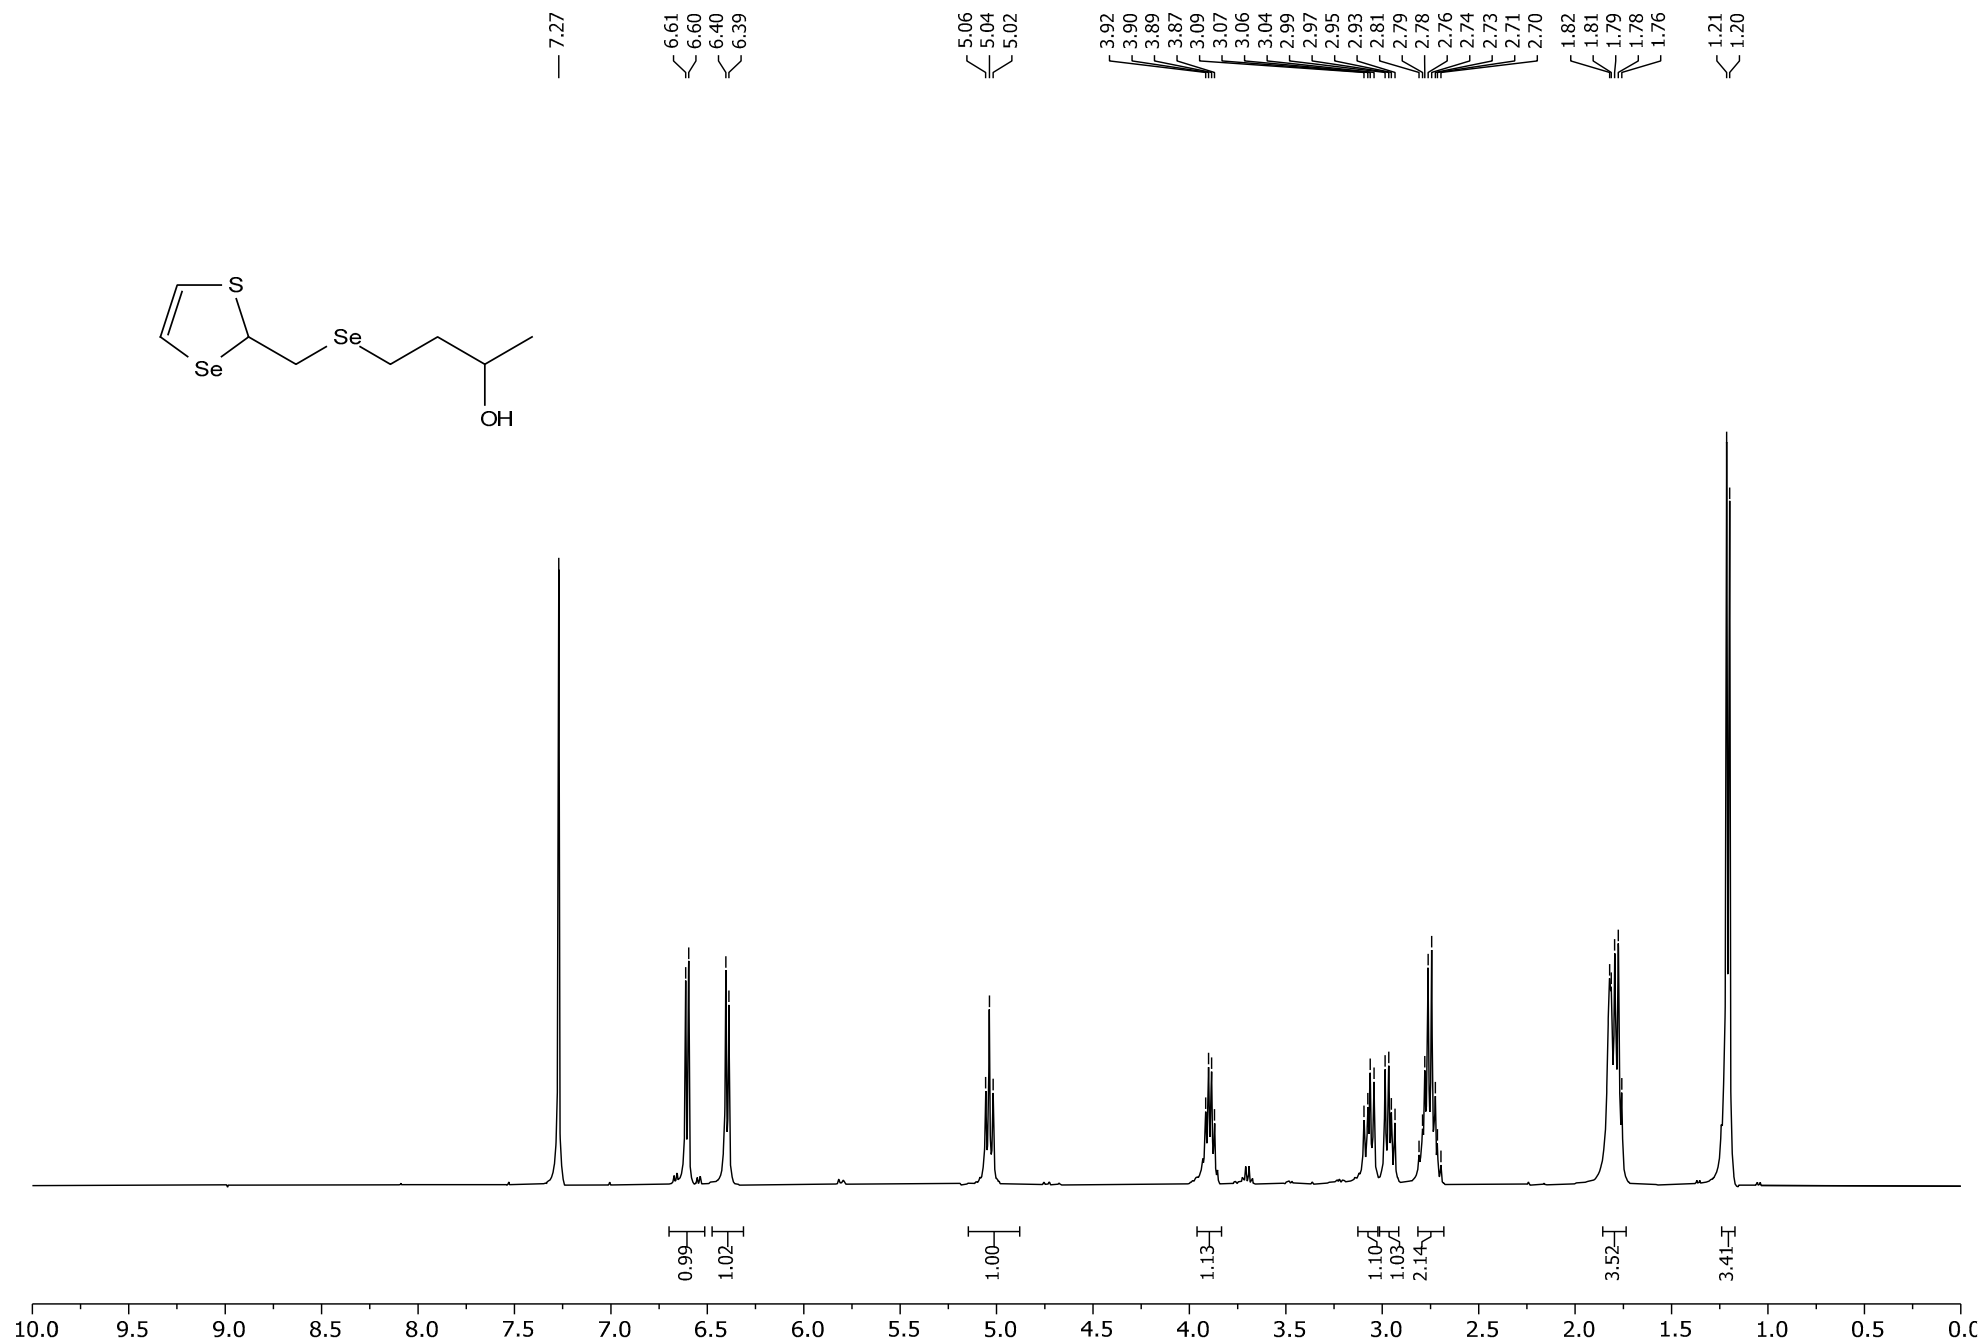

**<sup>1</sup>H NMR spectrum of compound 3e**

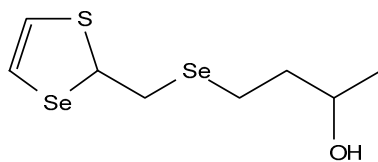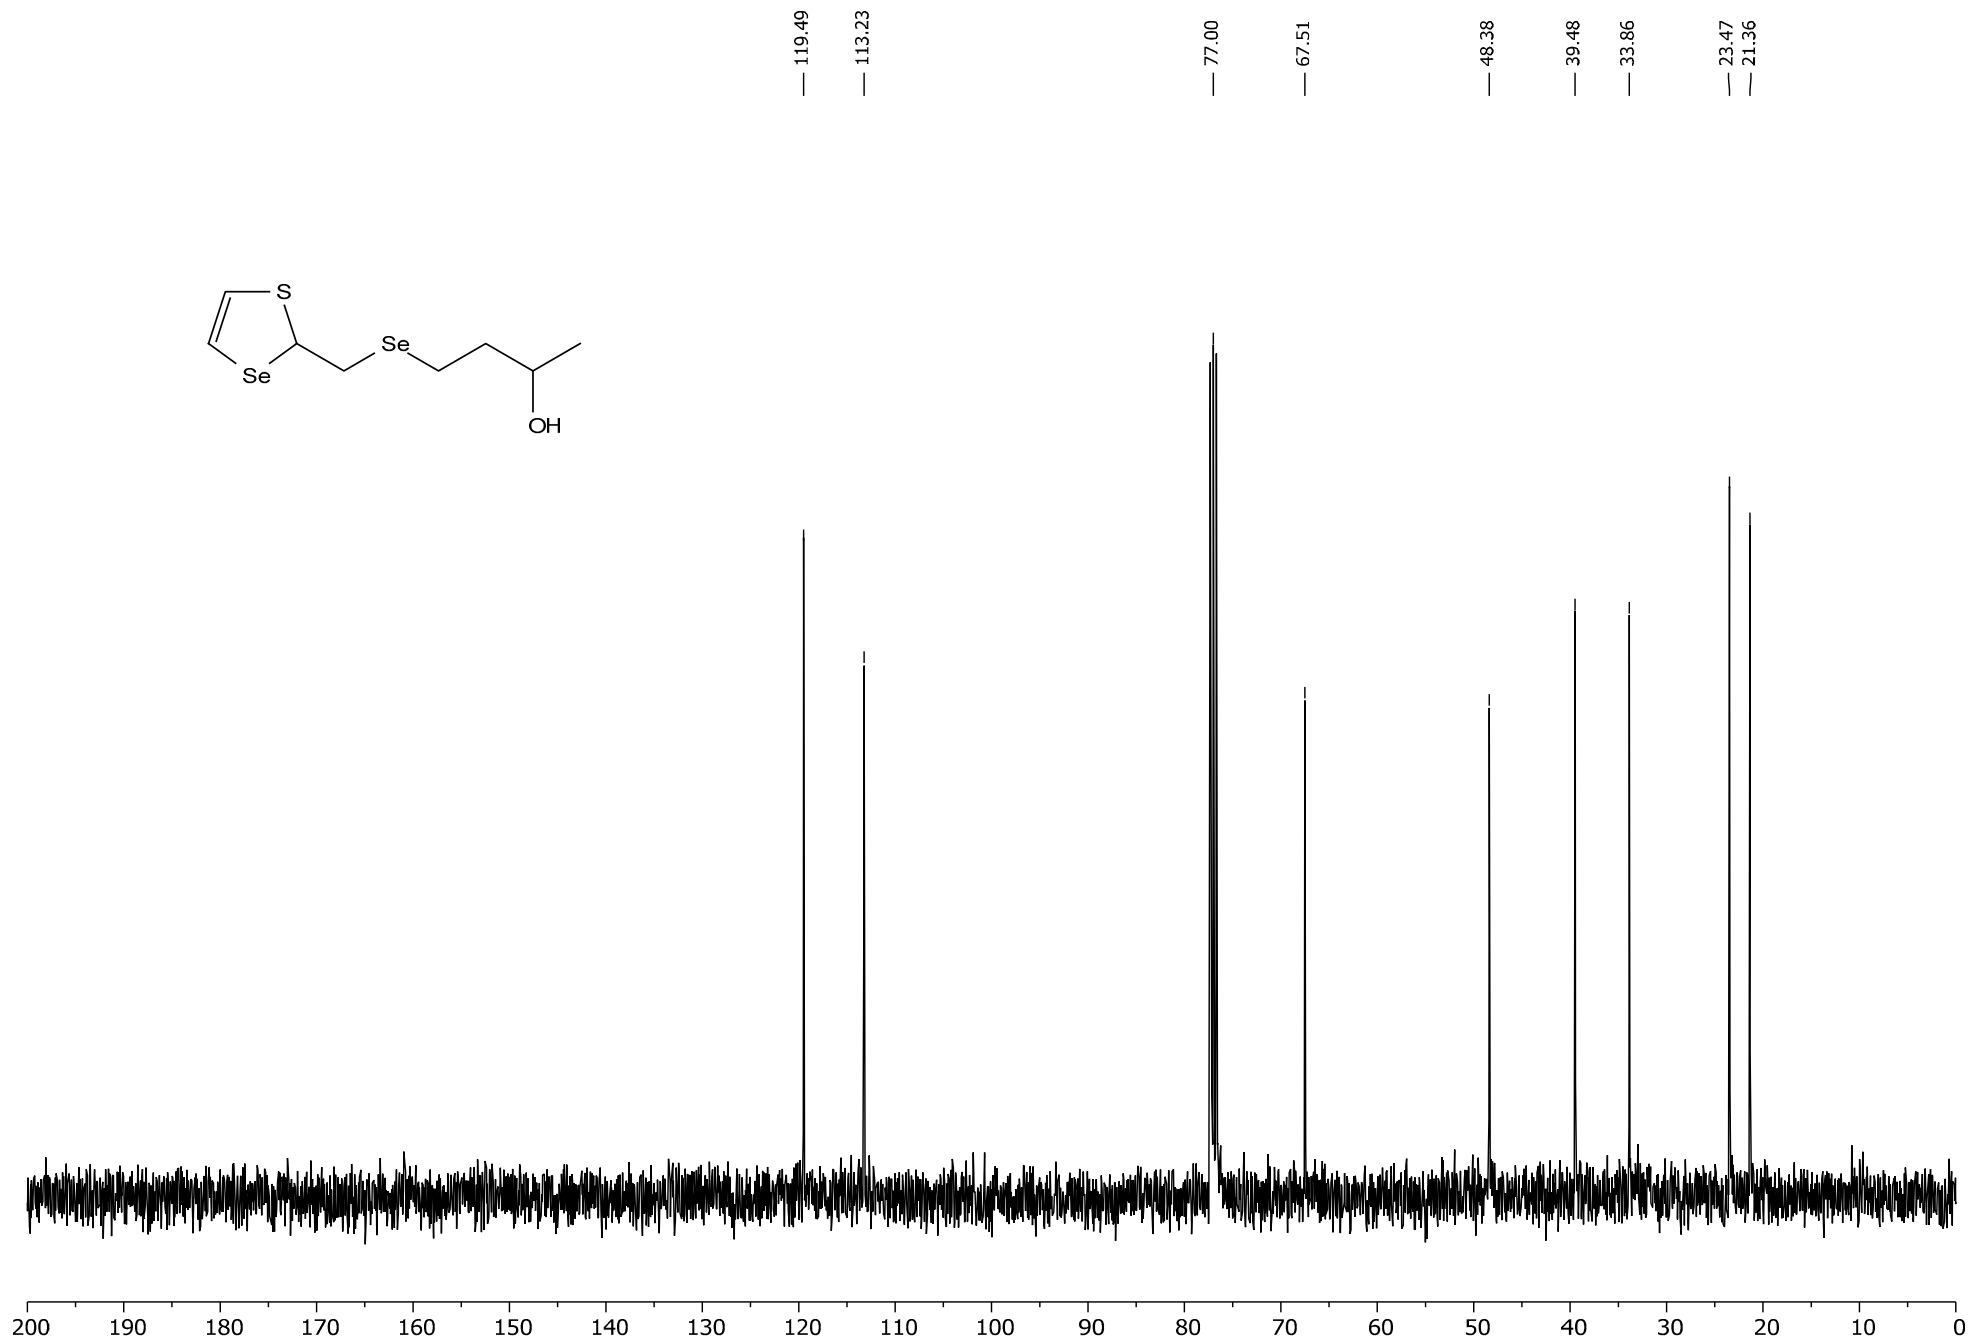

$^{13}\text{C}$  NMR spectrum of compound 3e

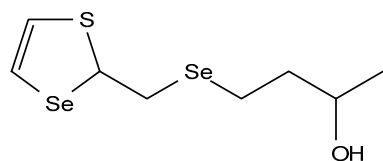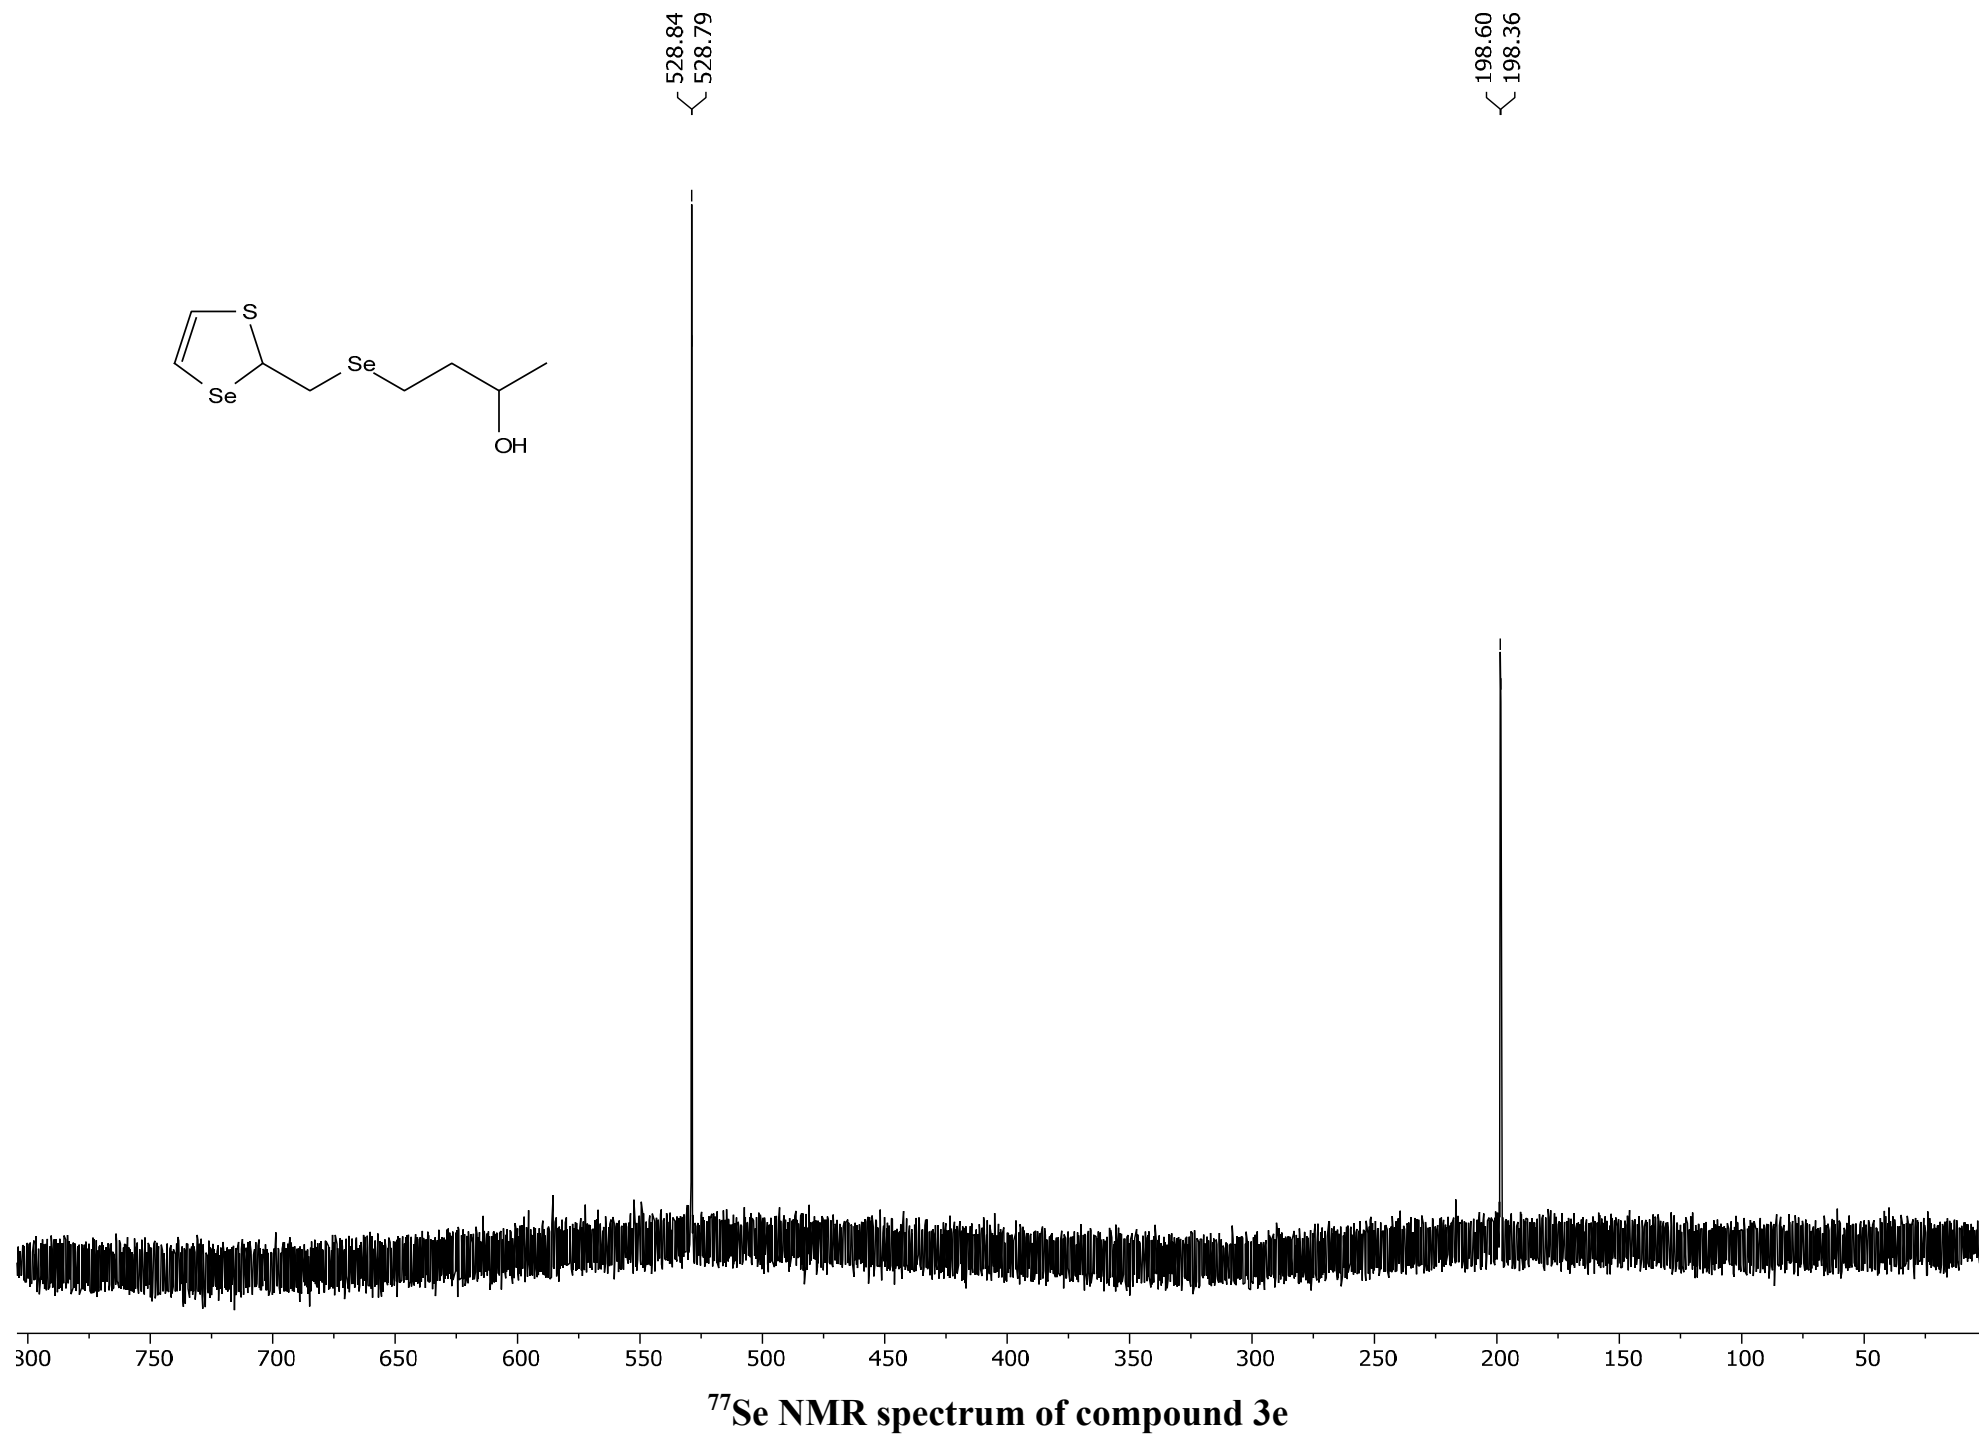



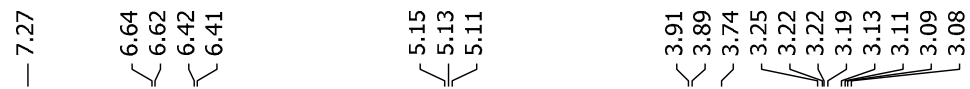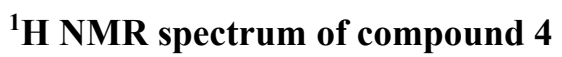

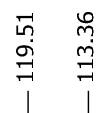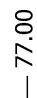

— 47.97

— 35.61

— 15.81

26

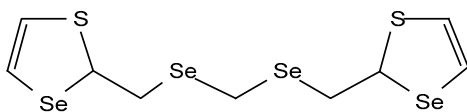

529.25  
529.17

245.83

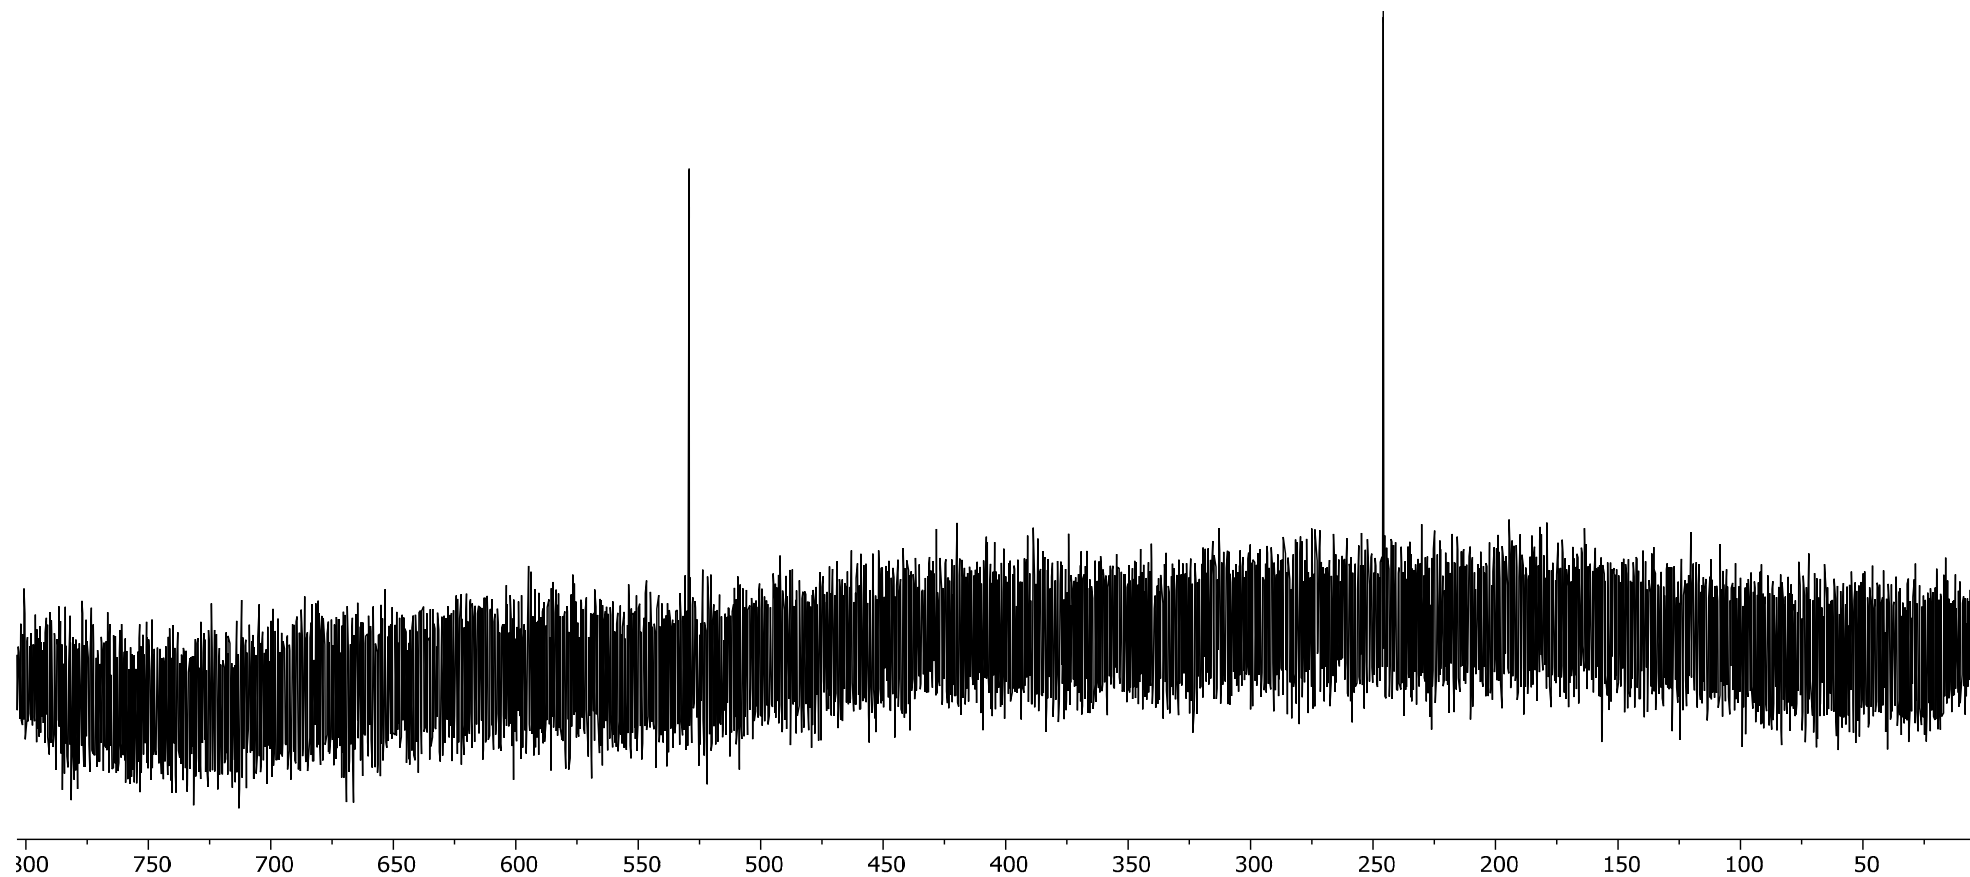

$^{77}\text{Se}$  NMR spectrum of compound 4

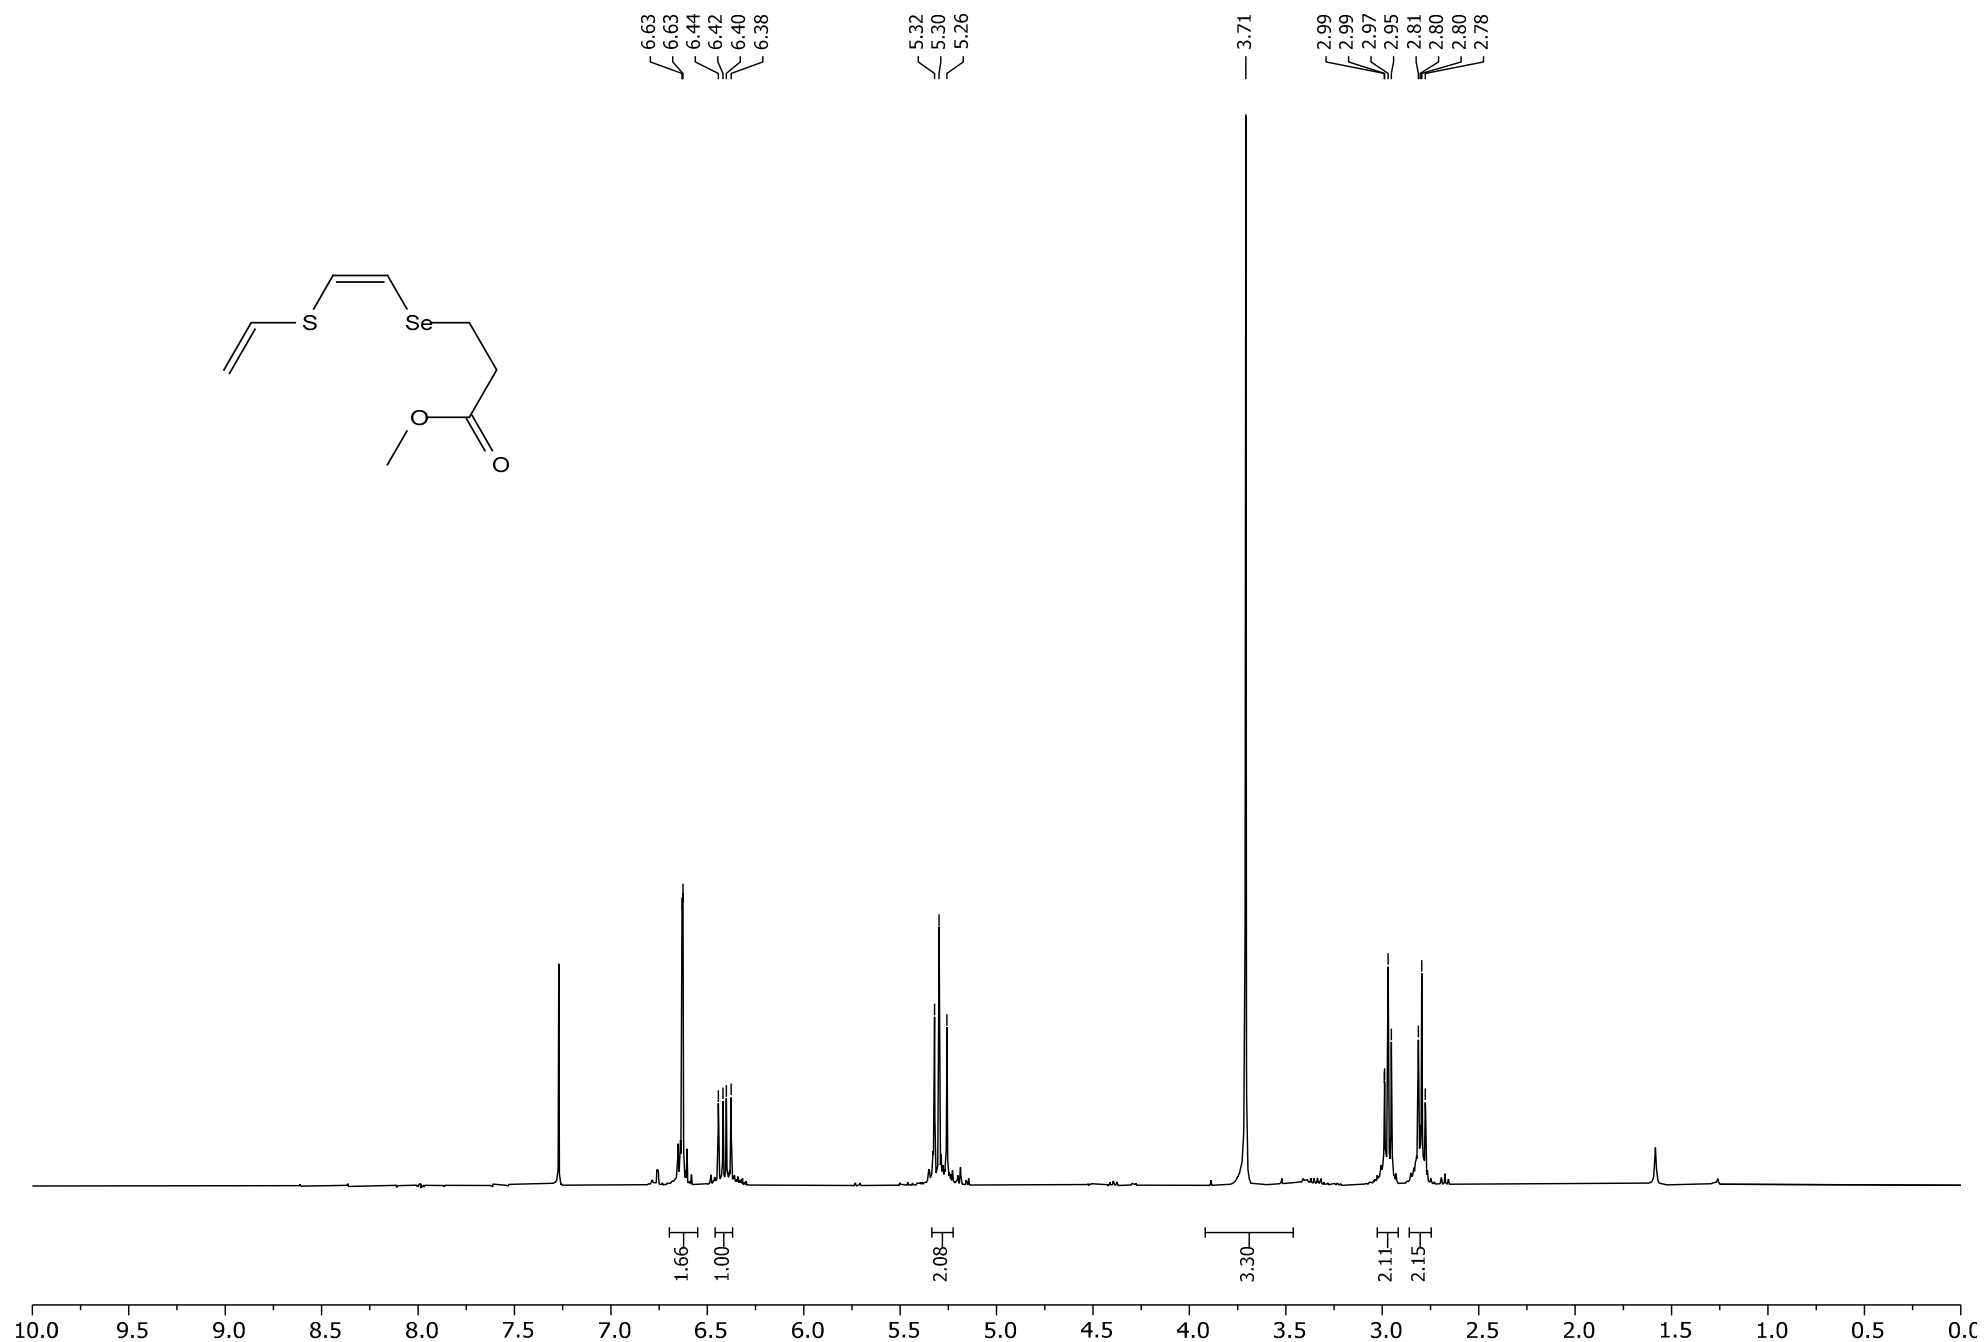

<sup>1</sup>H NMR spectrum of compound 5a

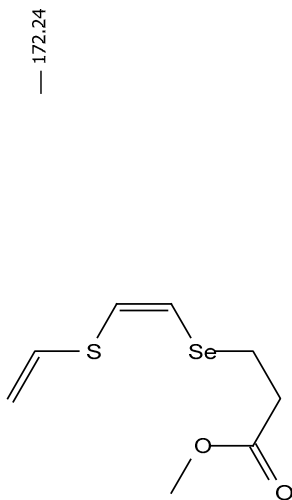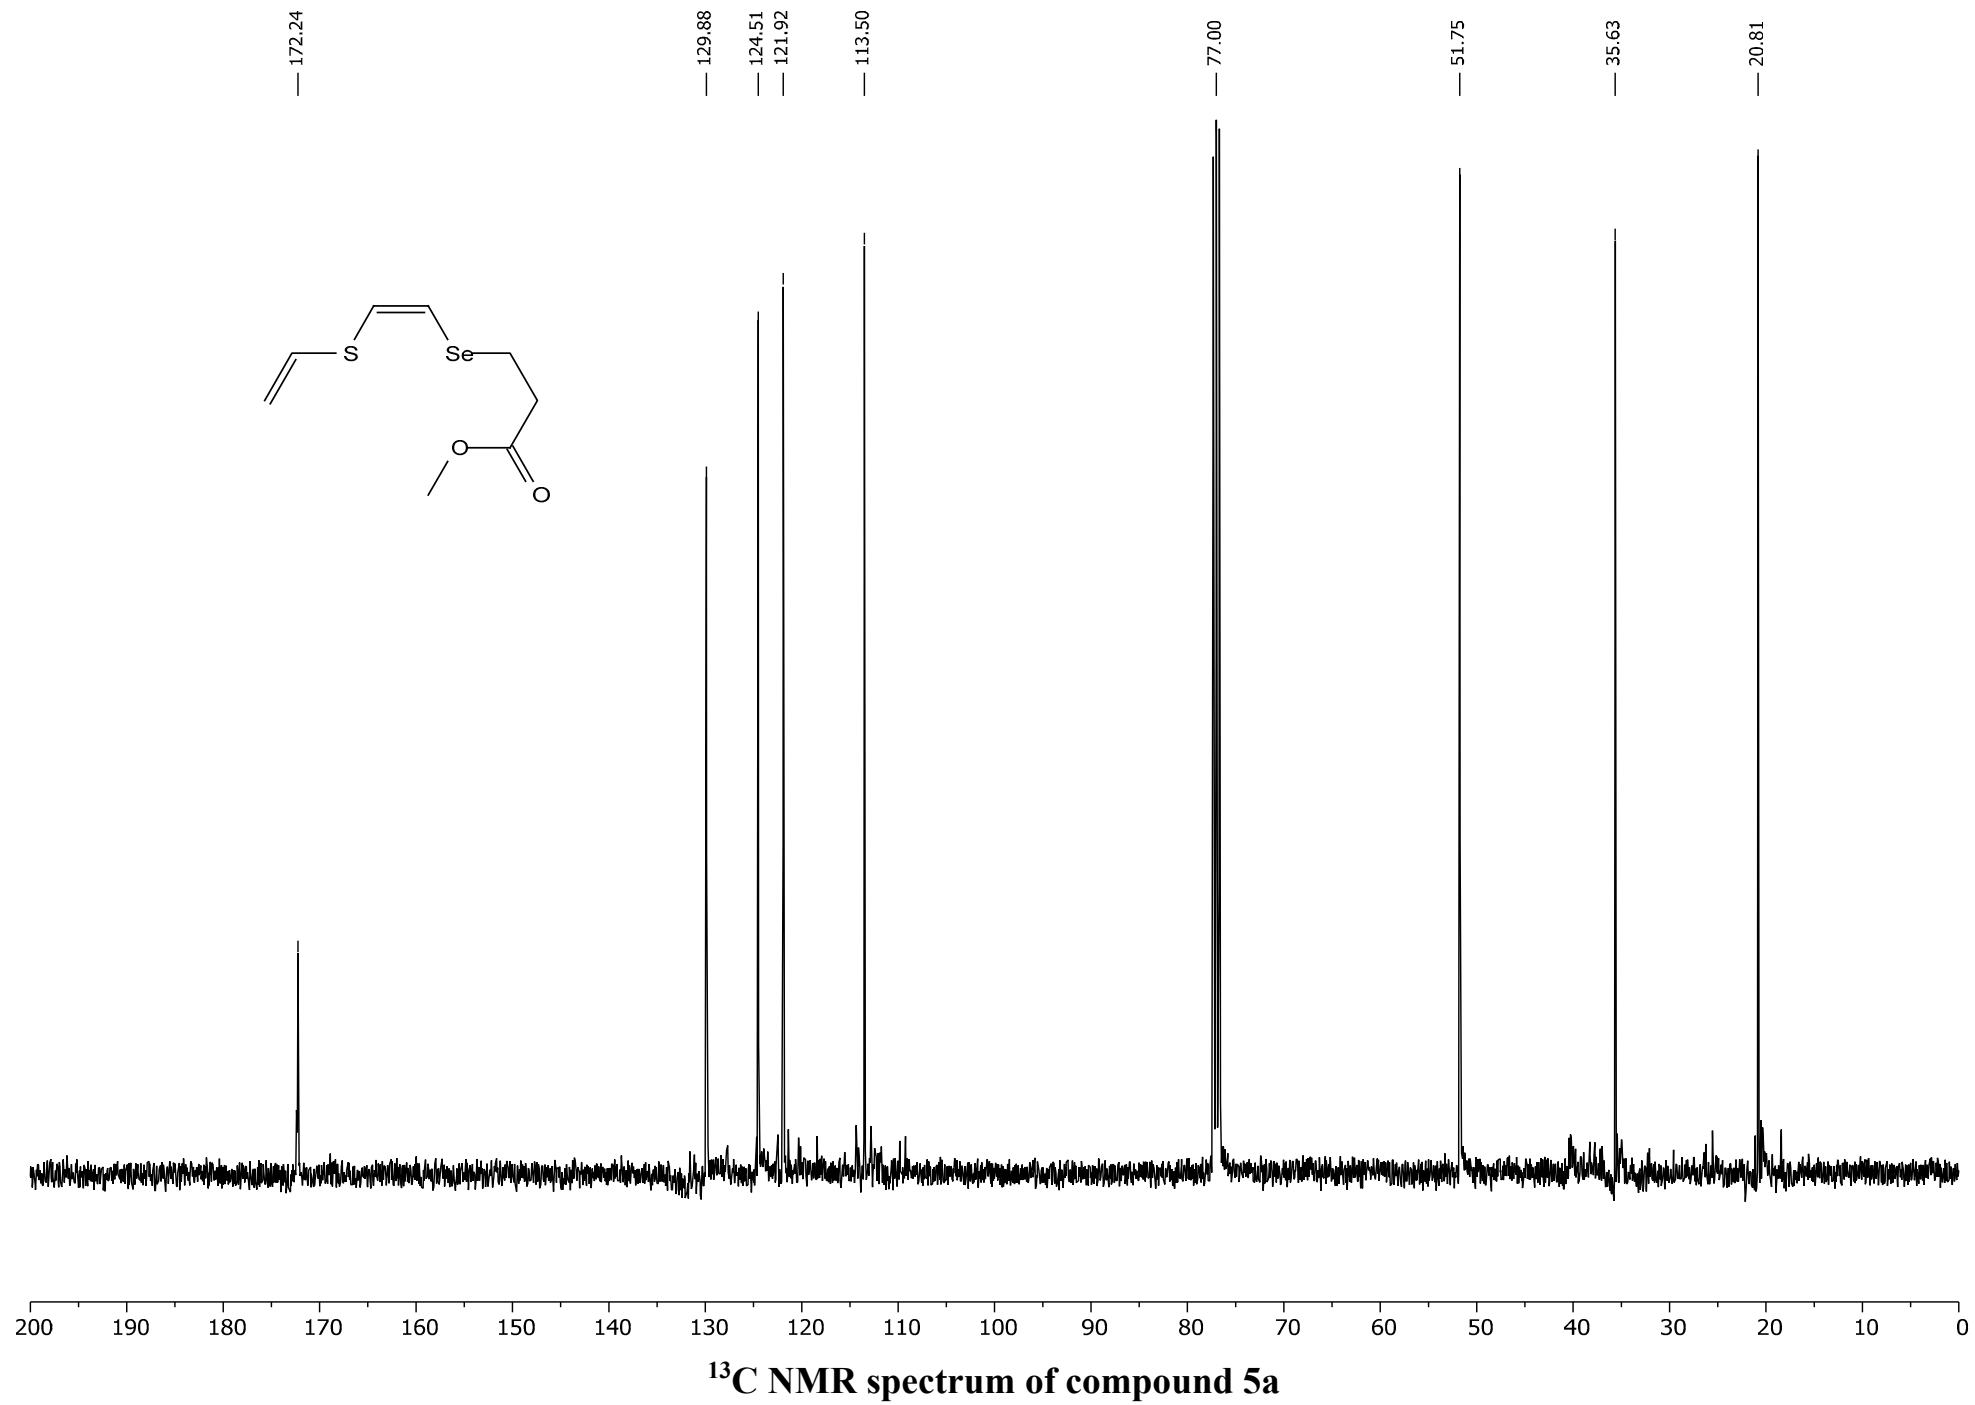

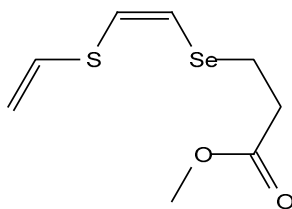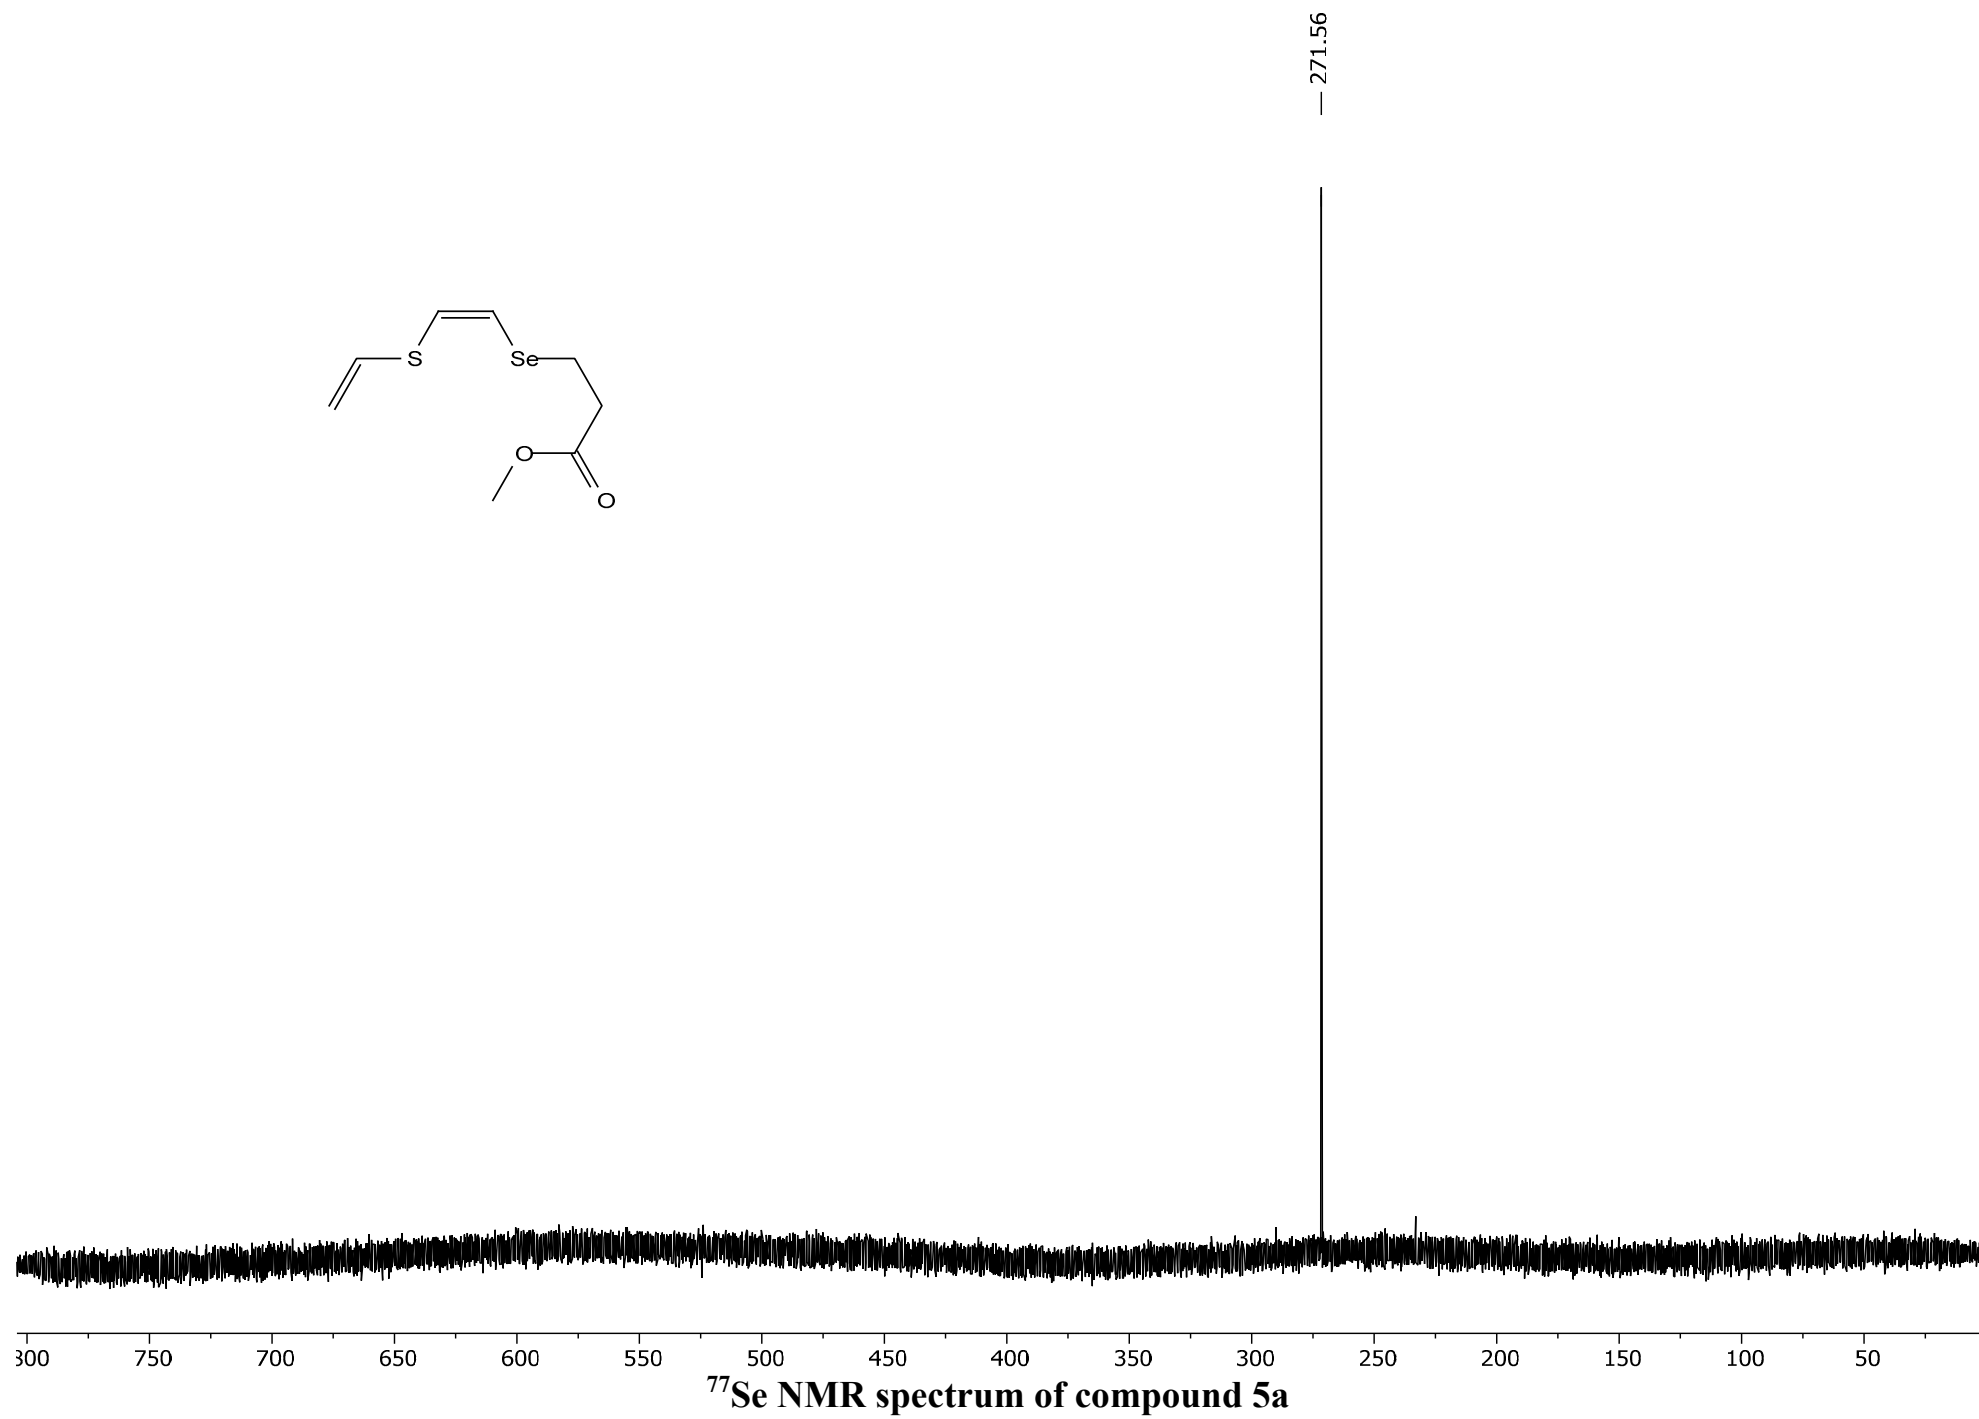

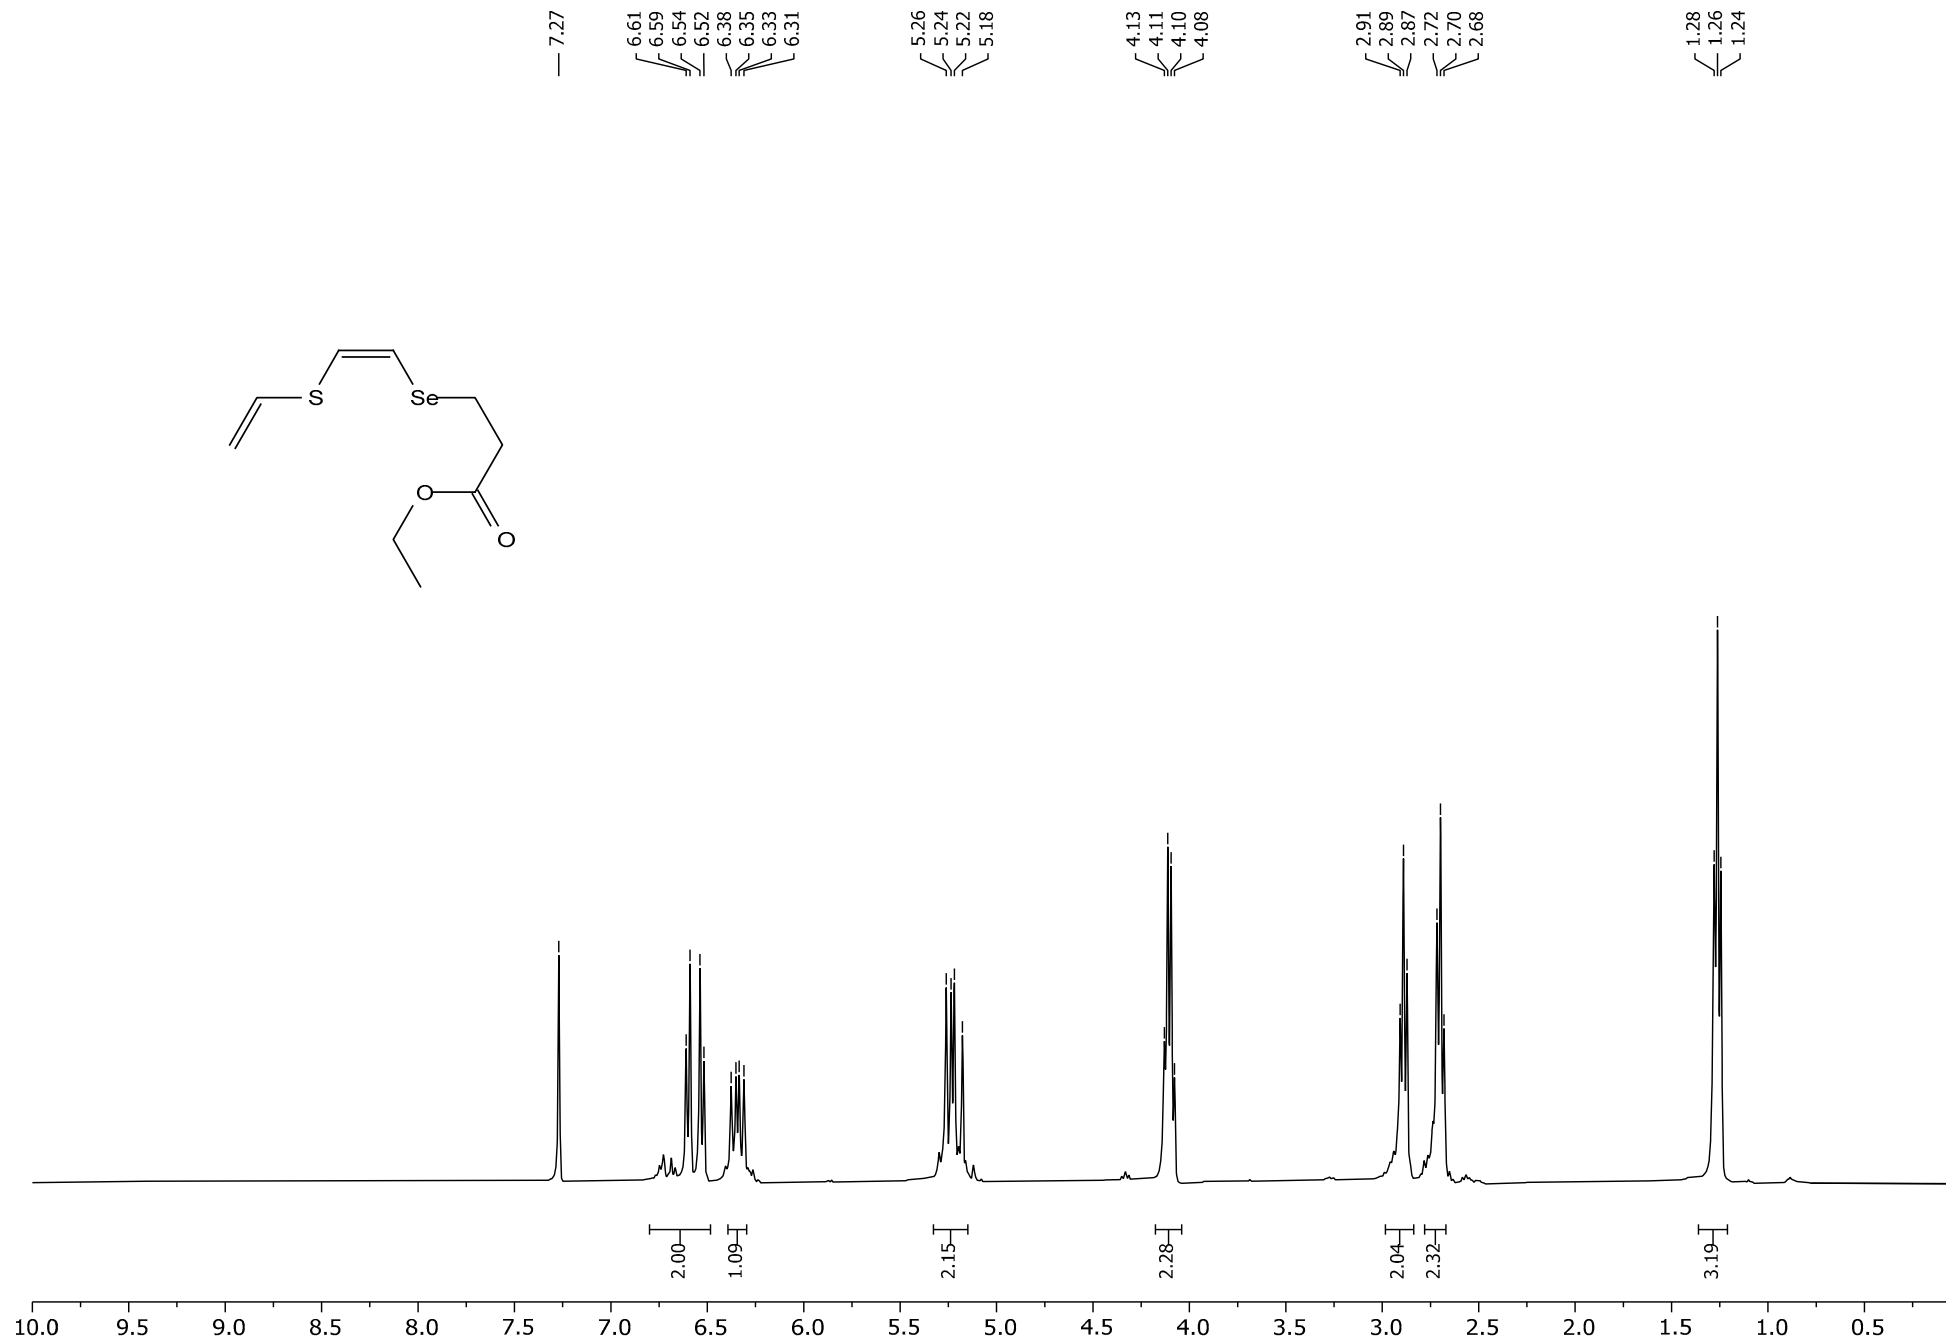

$^1\text{H}$  NMR spectrum of compound 5b

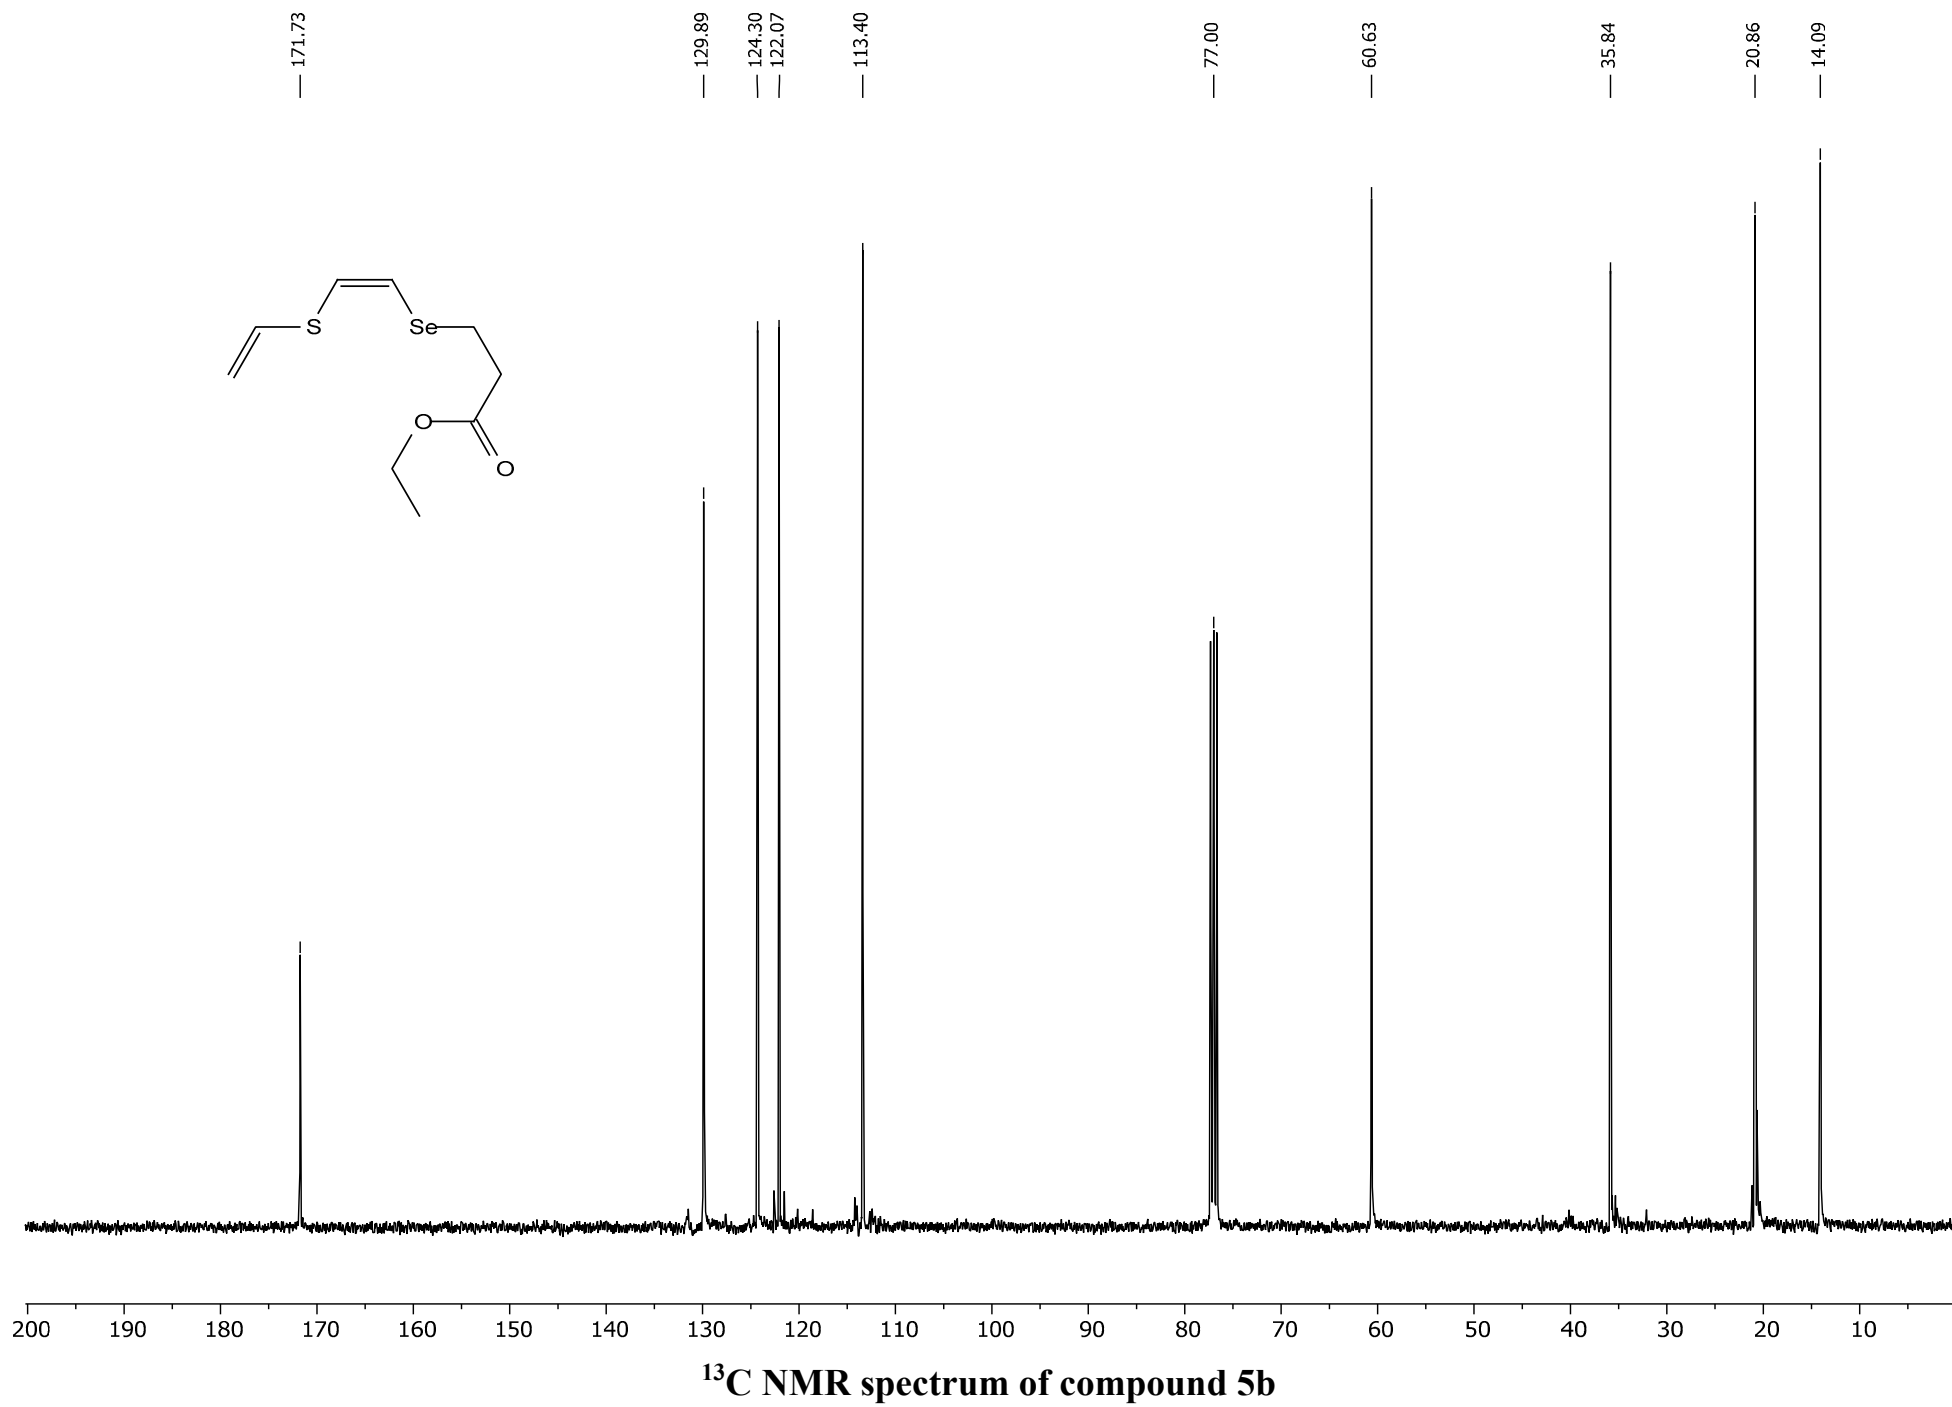



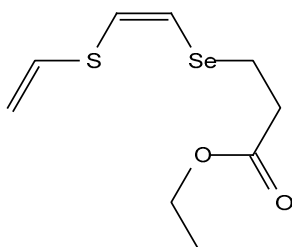

— 271.55

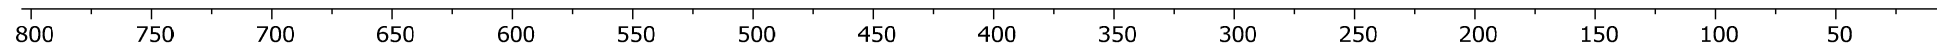

$^{77}\text{Se}$  NMR spectrum of compound 5b

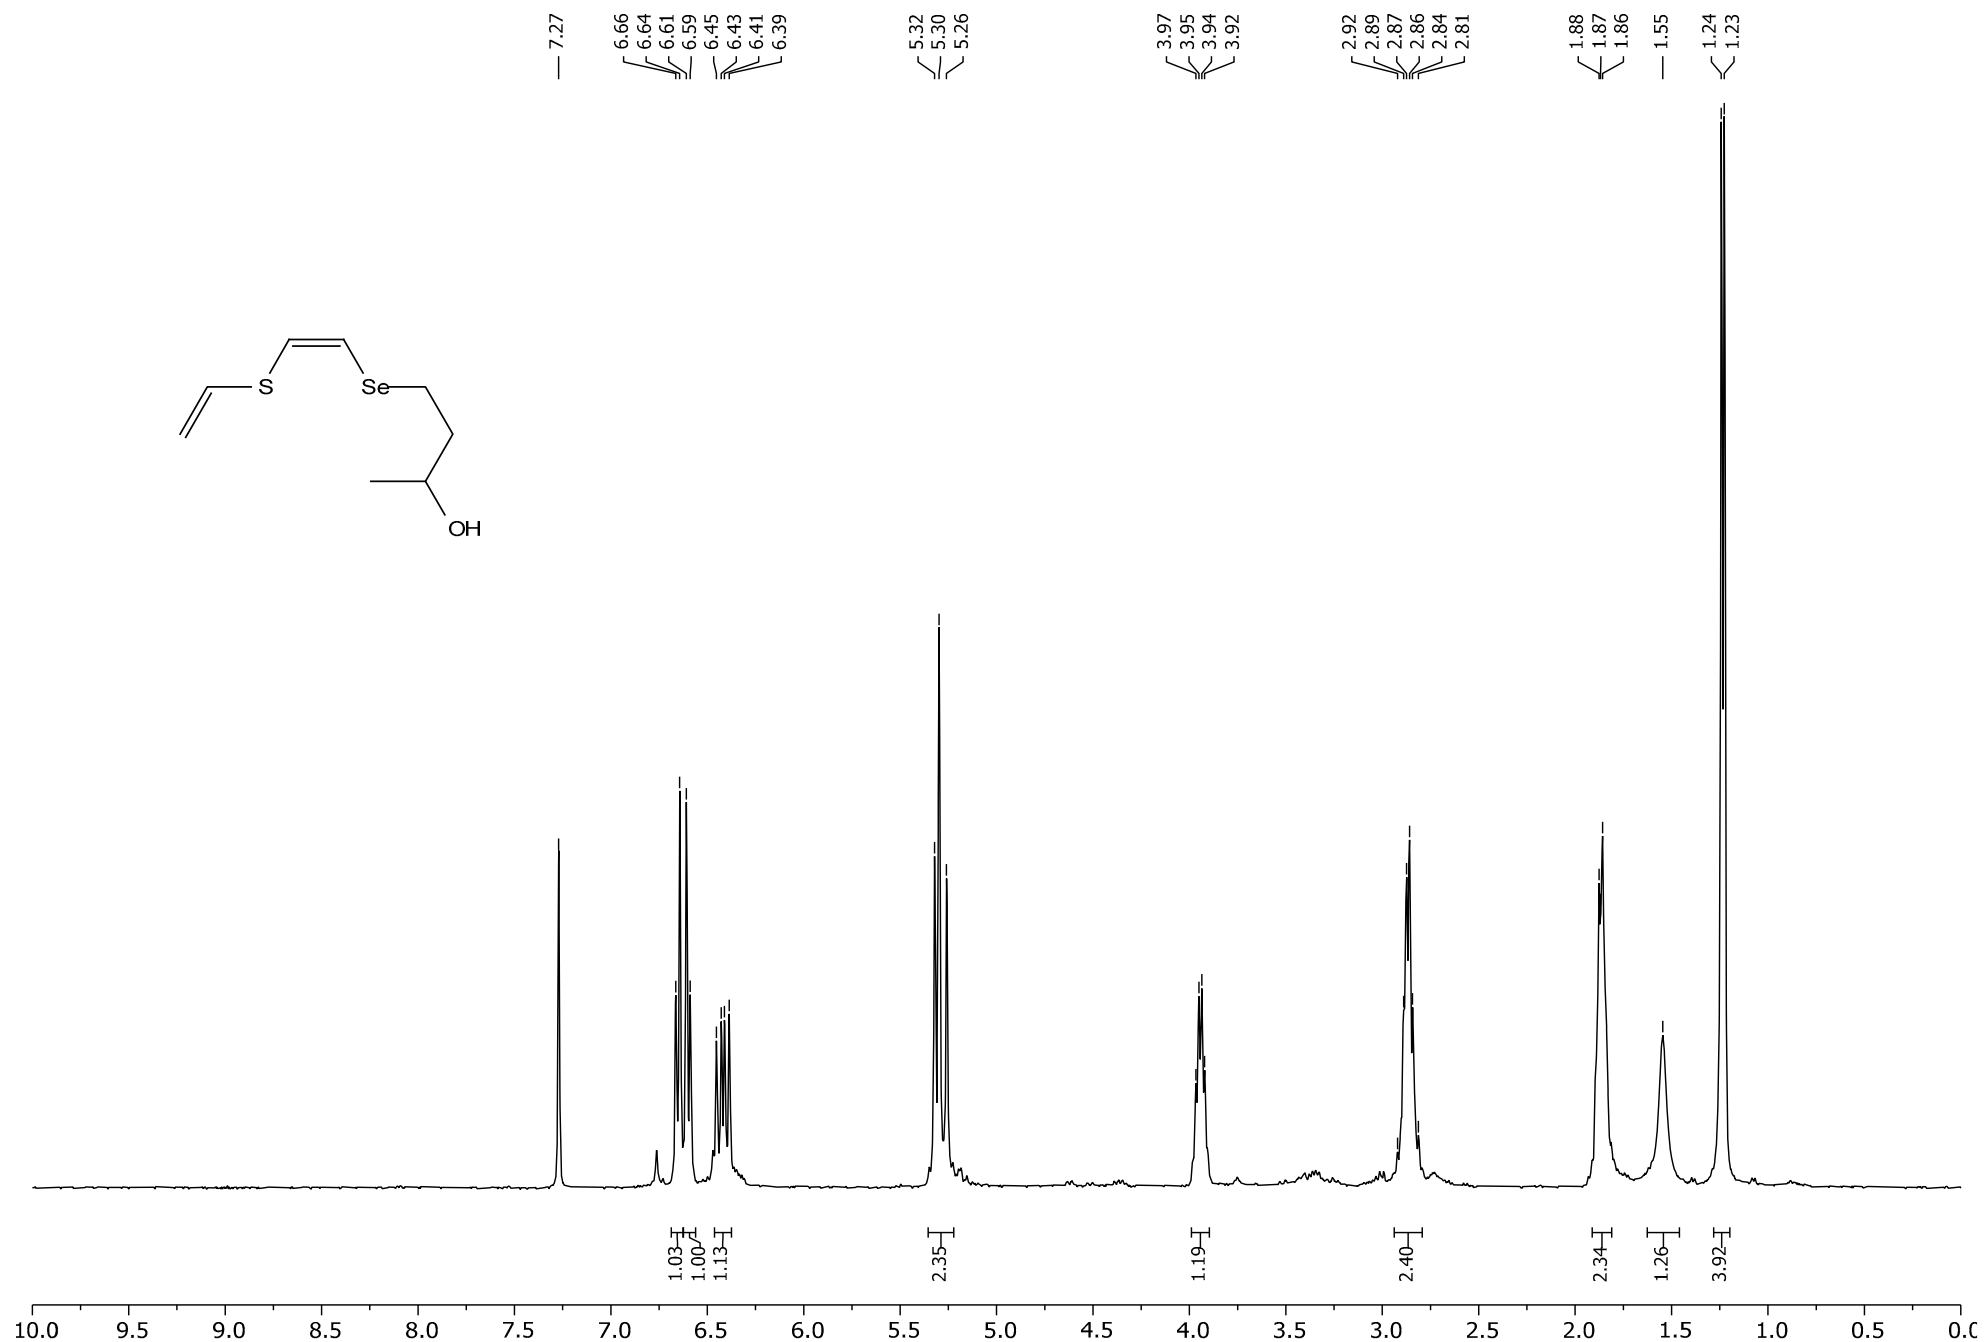

$^1\text{H}$  NMR spectrum of compound 5c

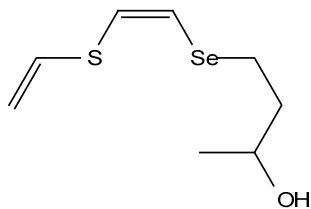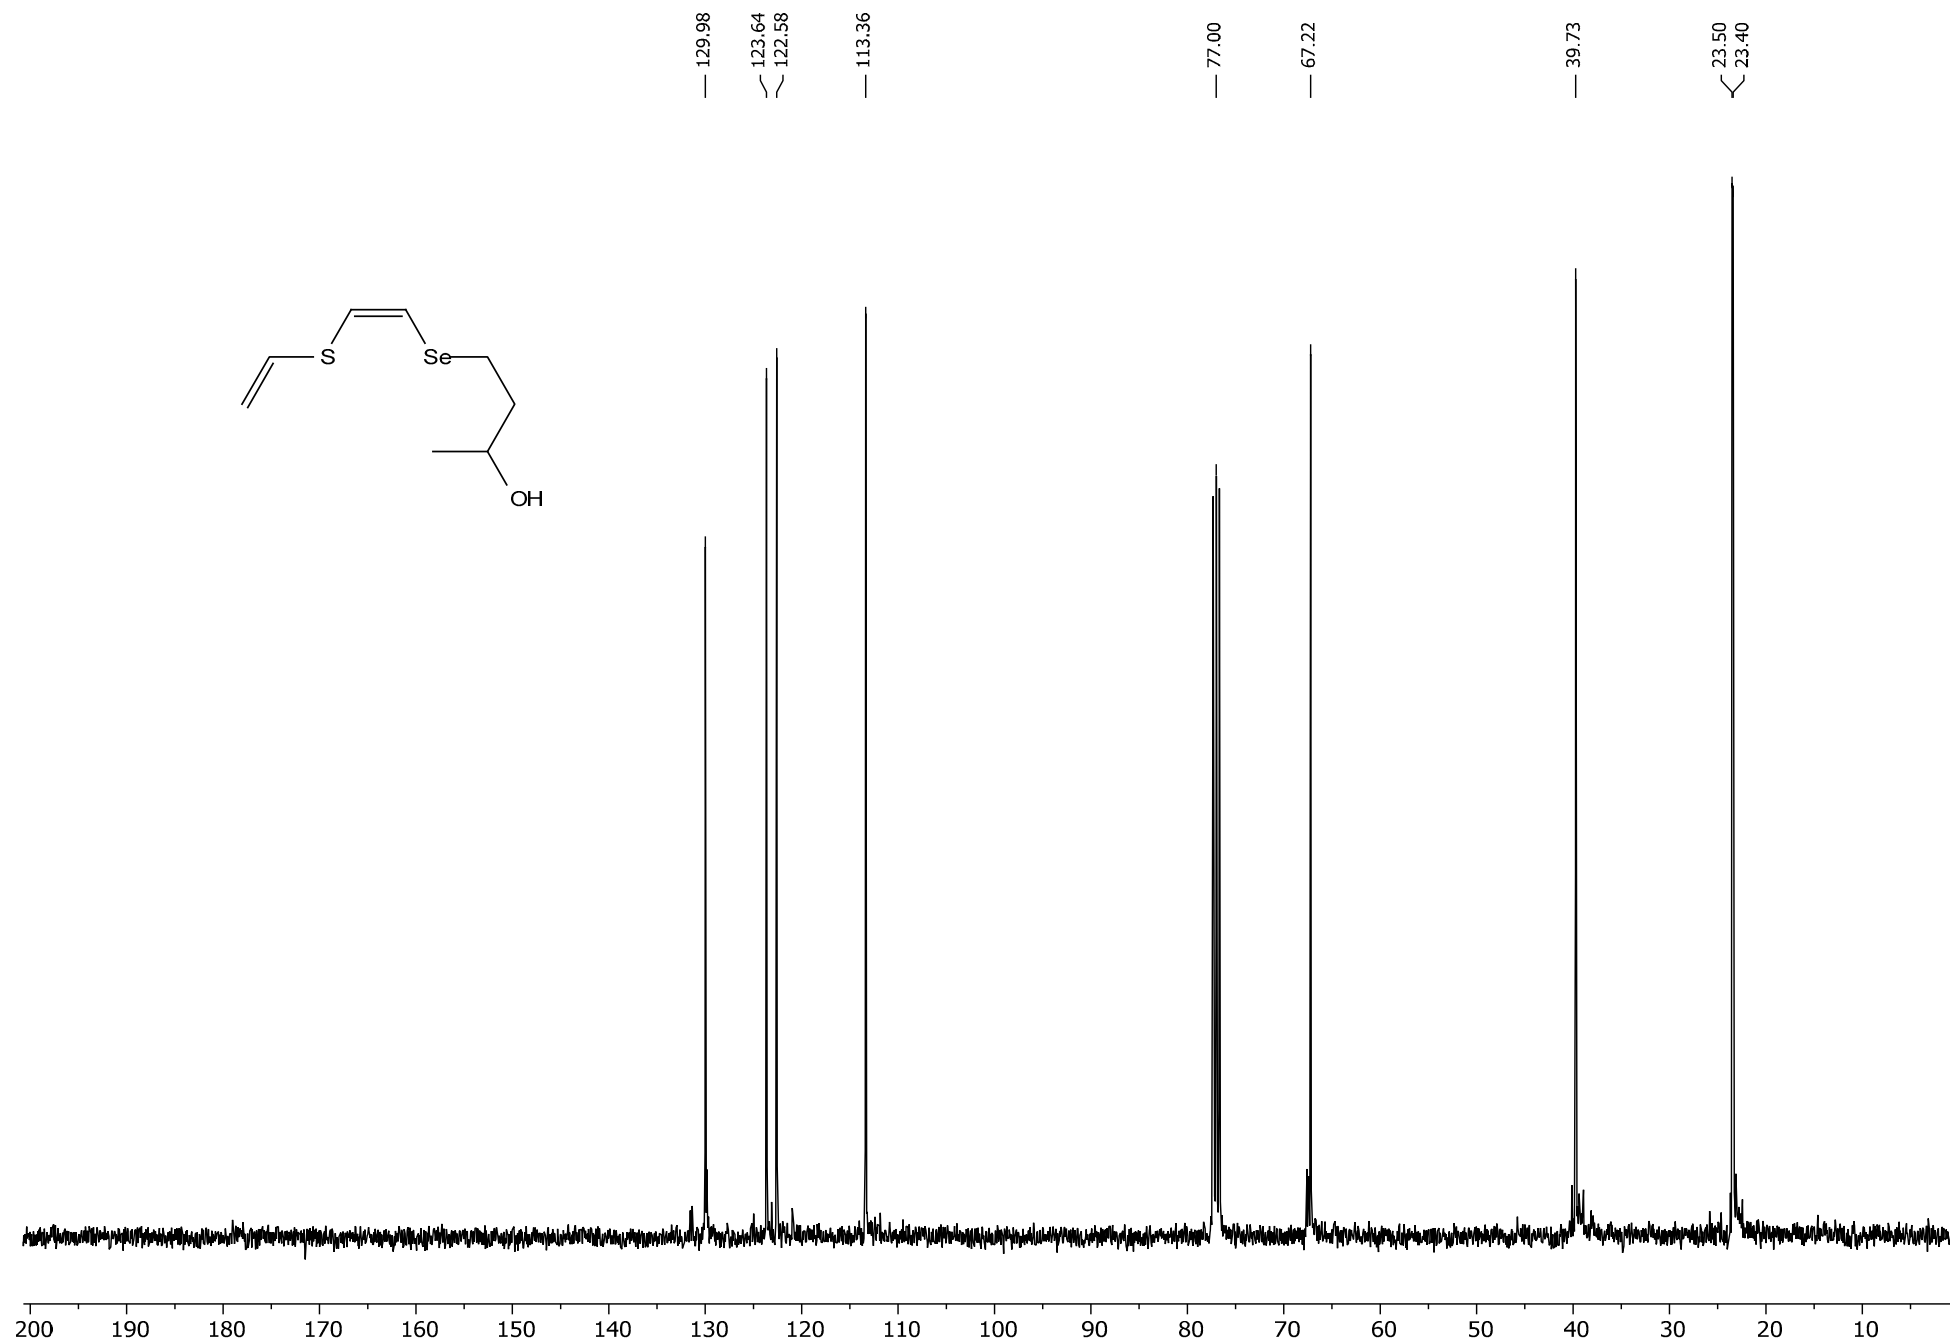

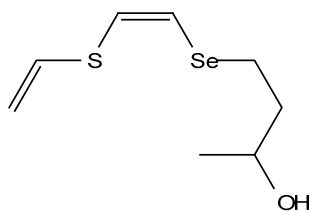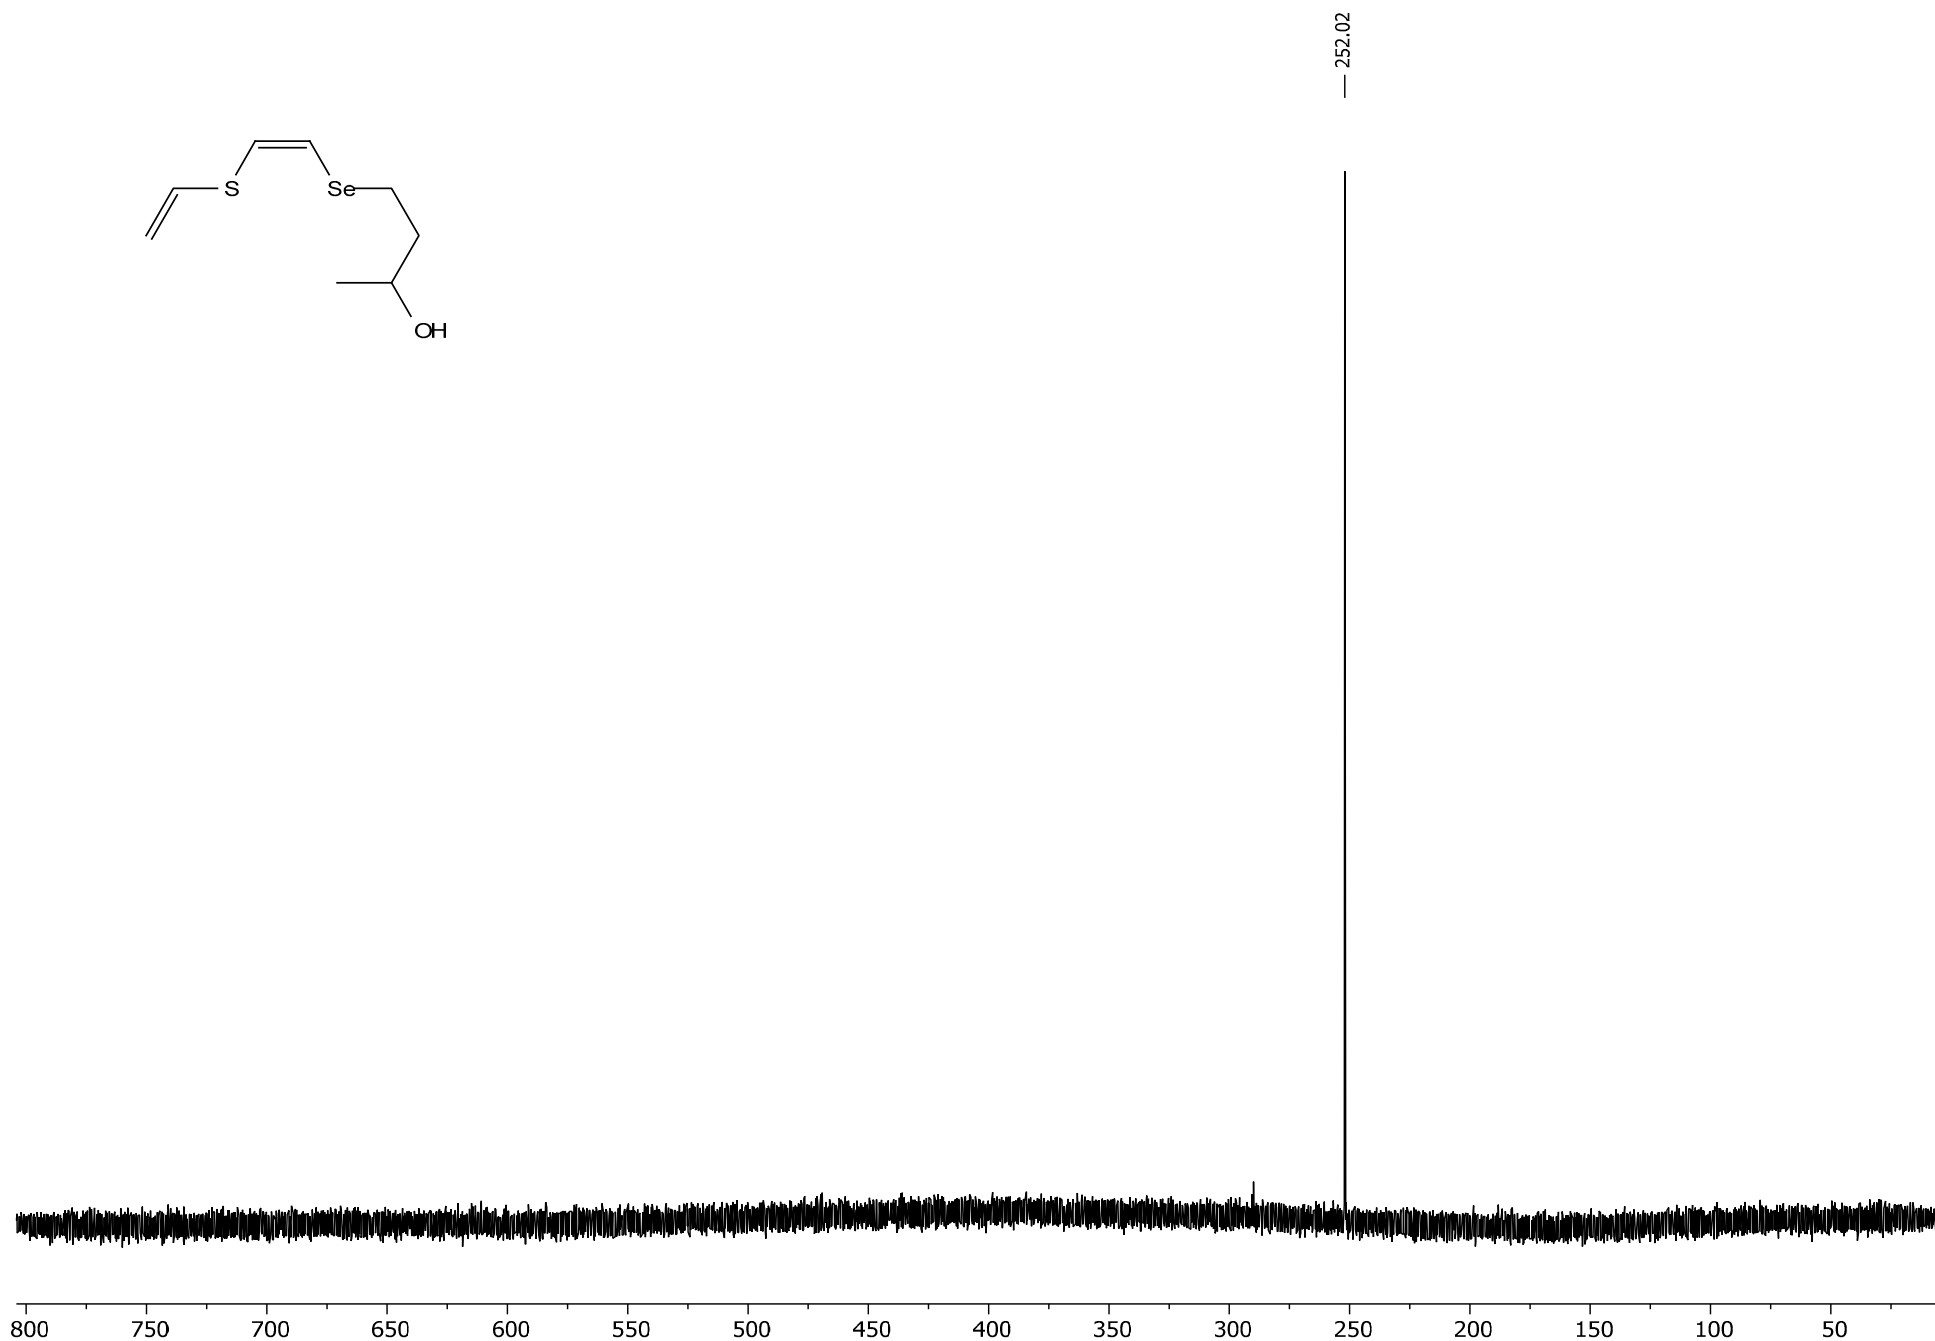

$^{77}\text{Se}$  NMR spectrum of compound 5c

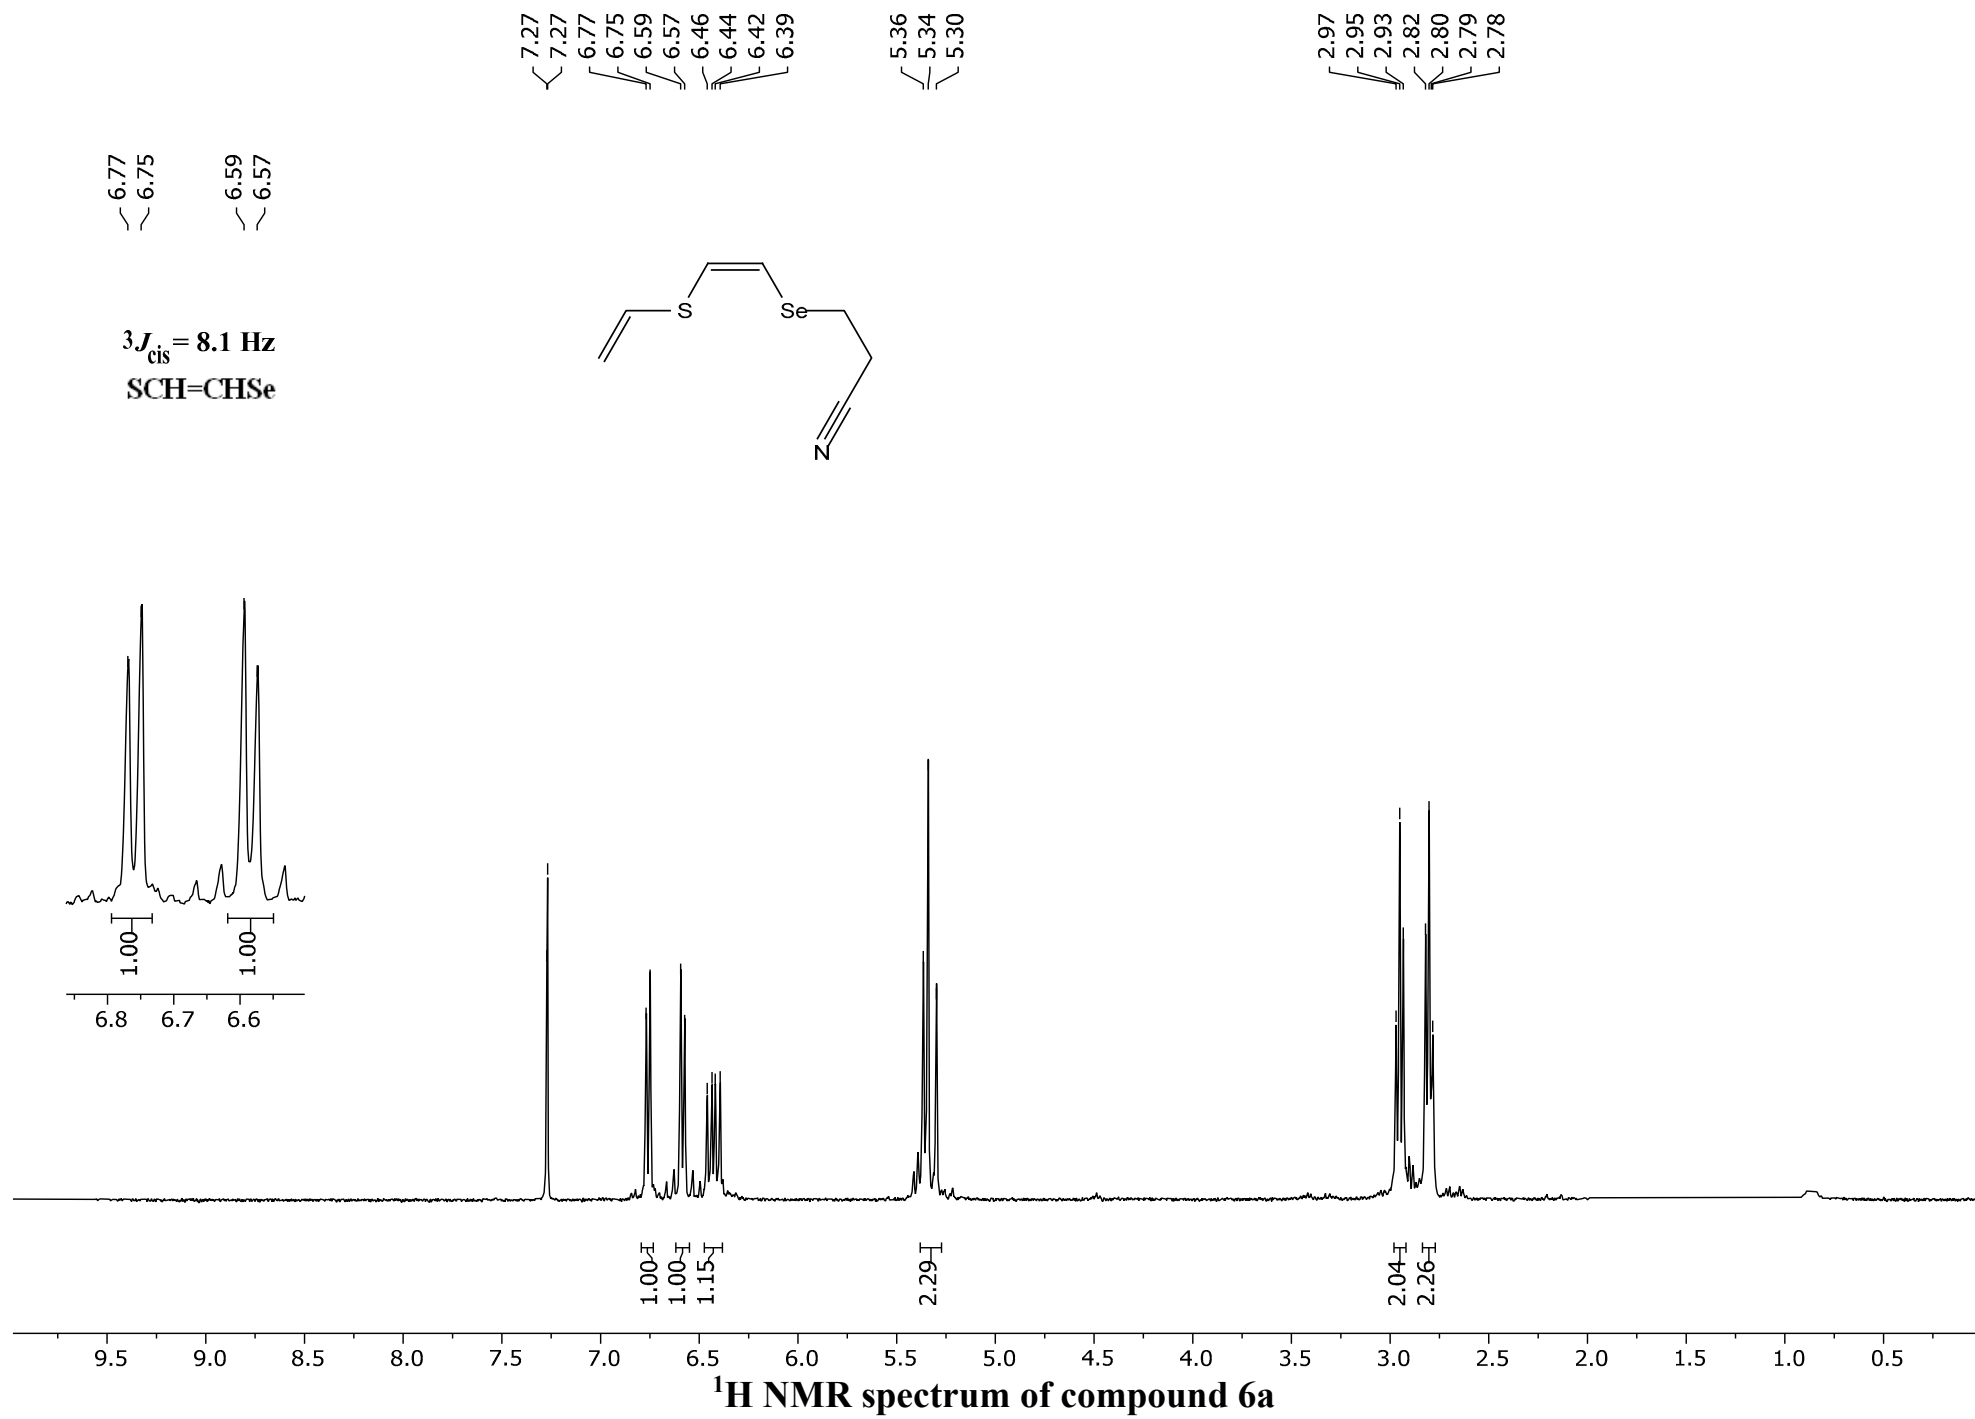

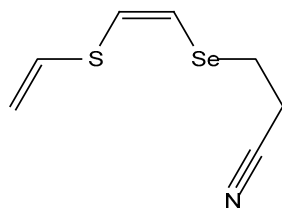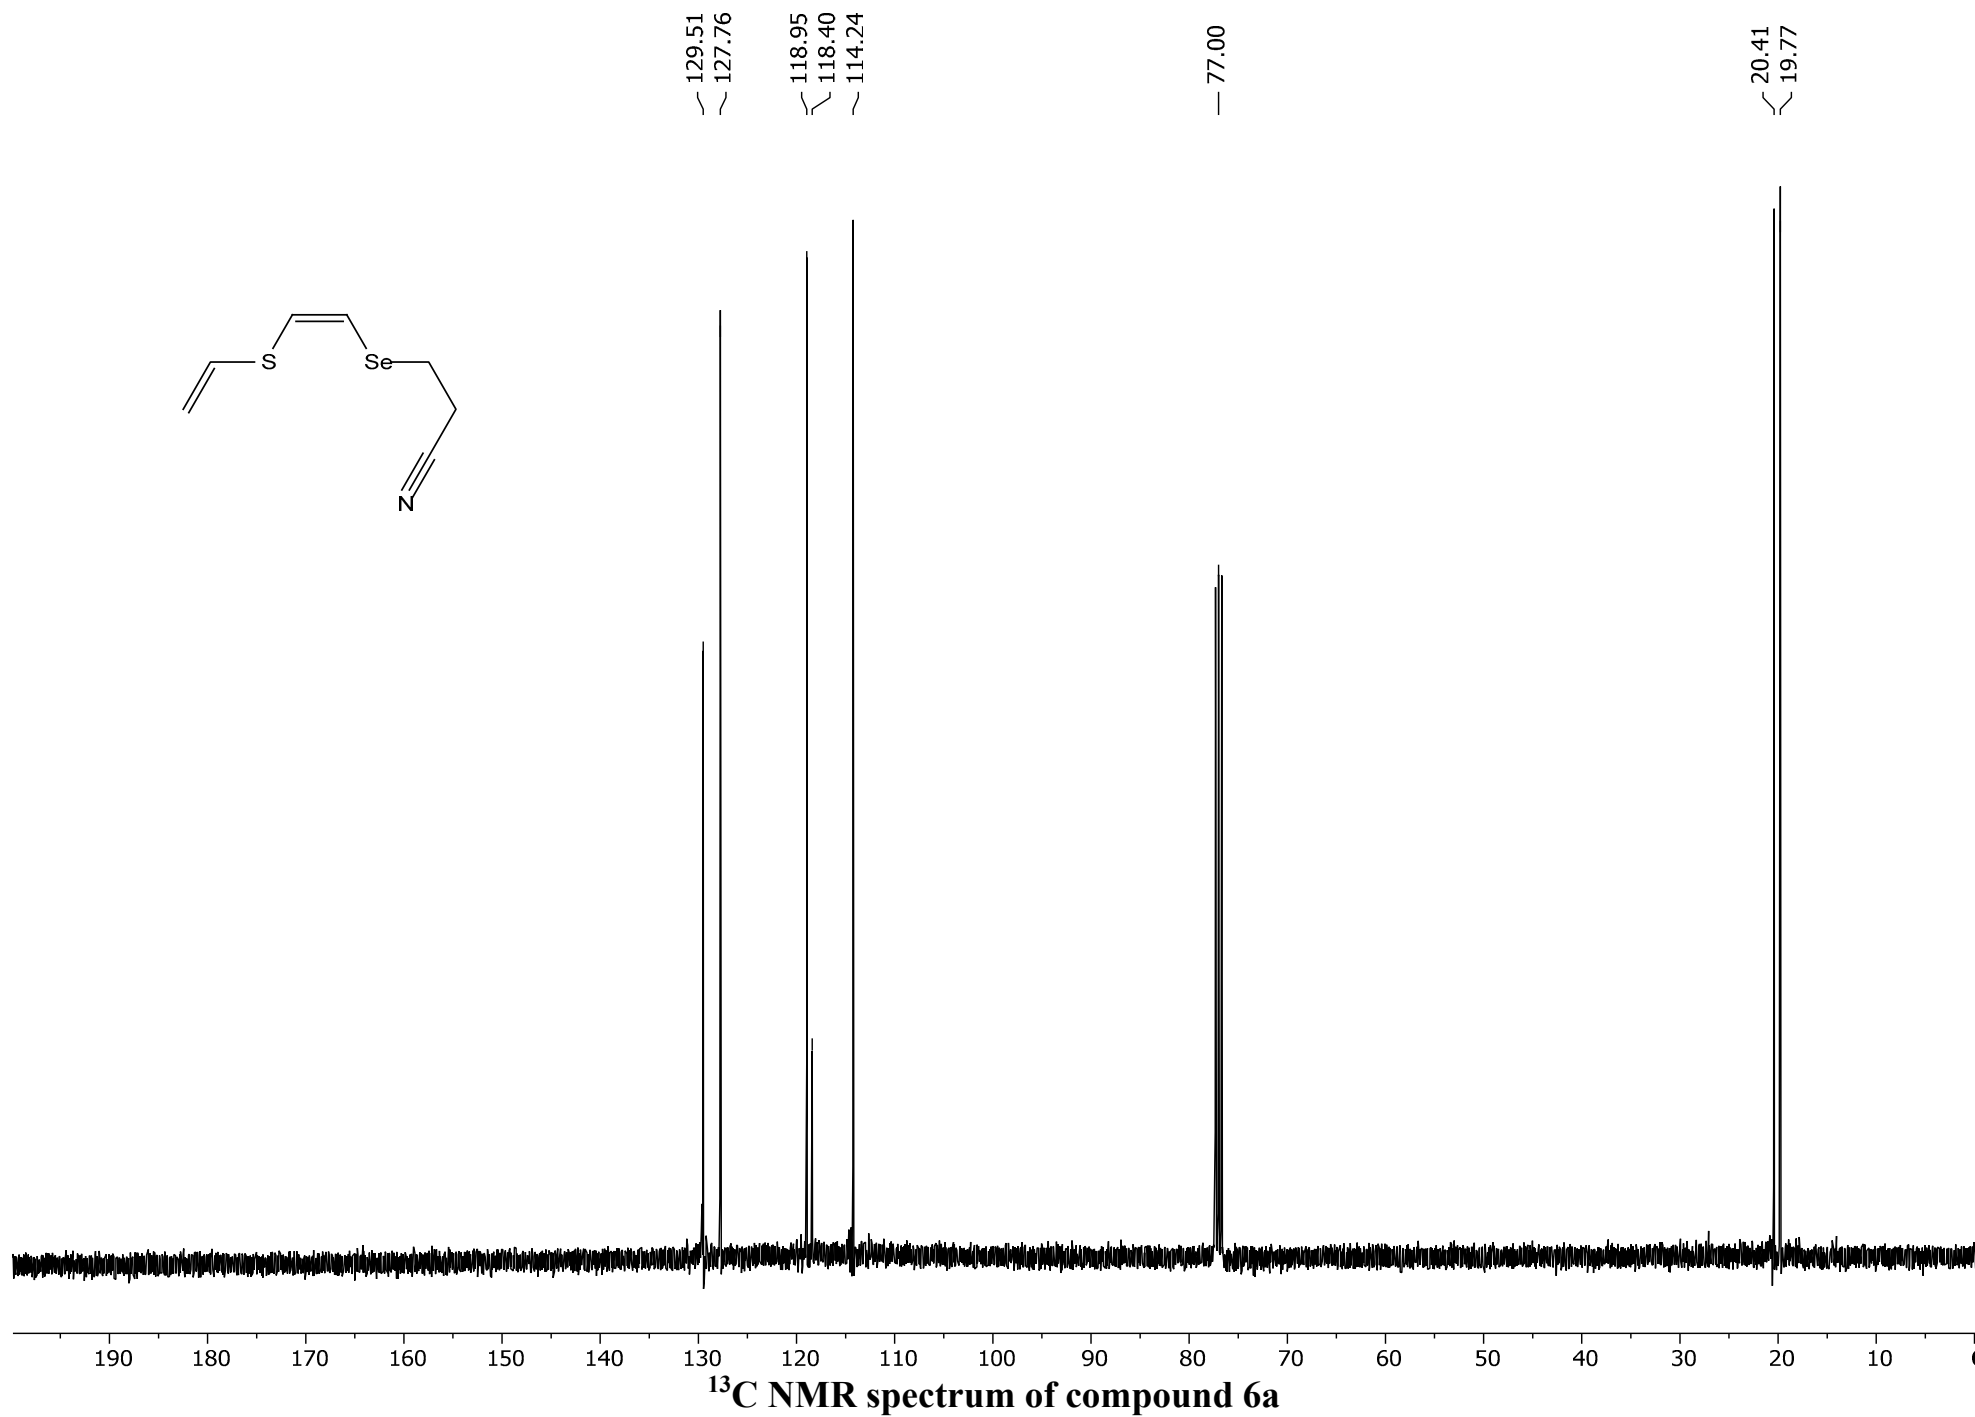

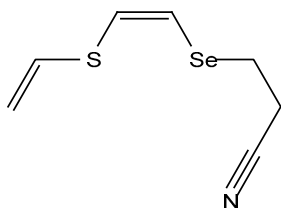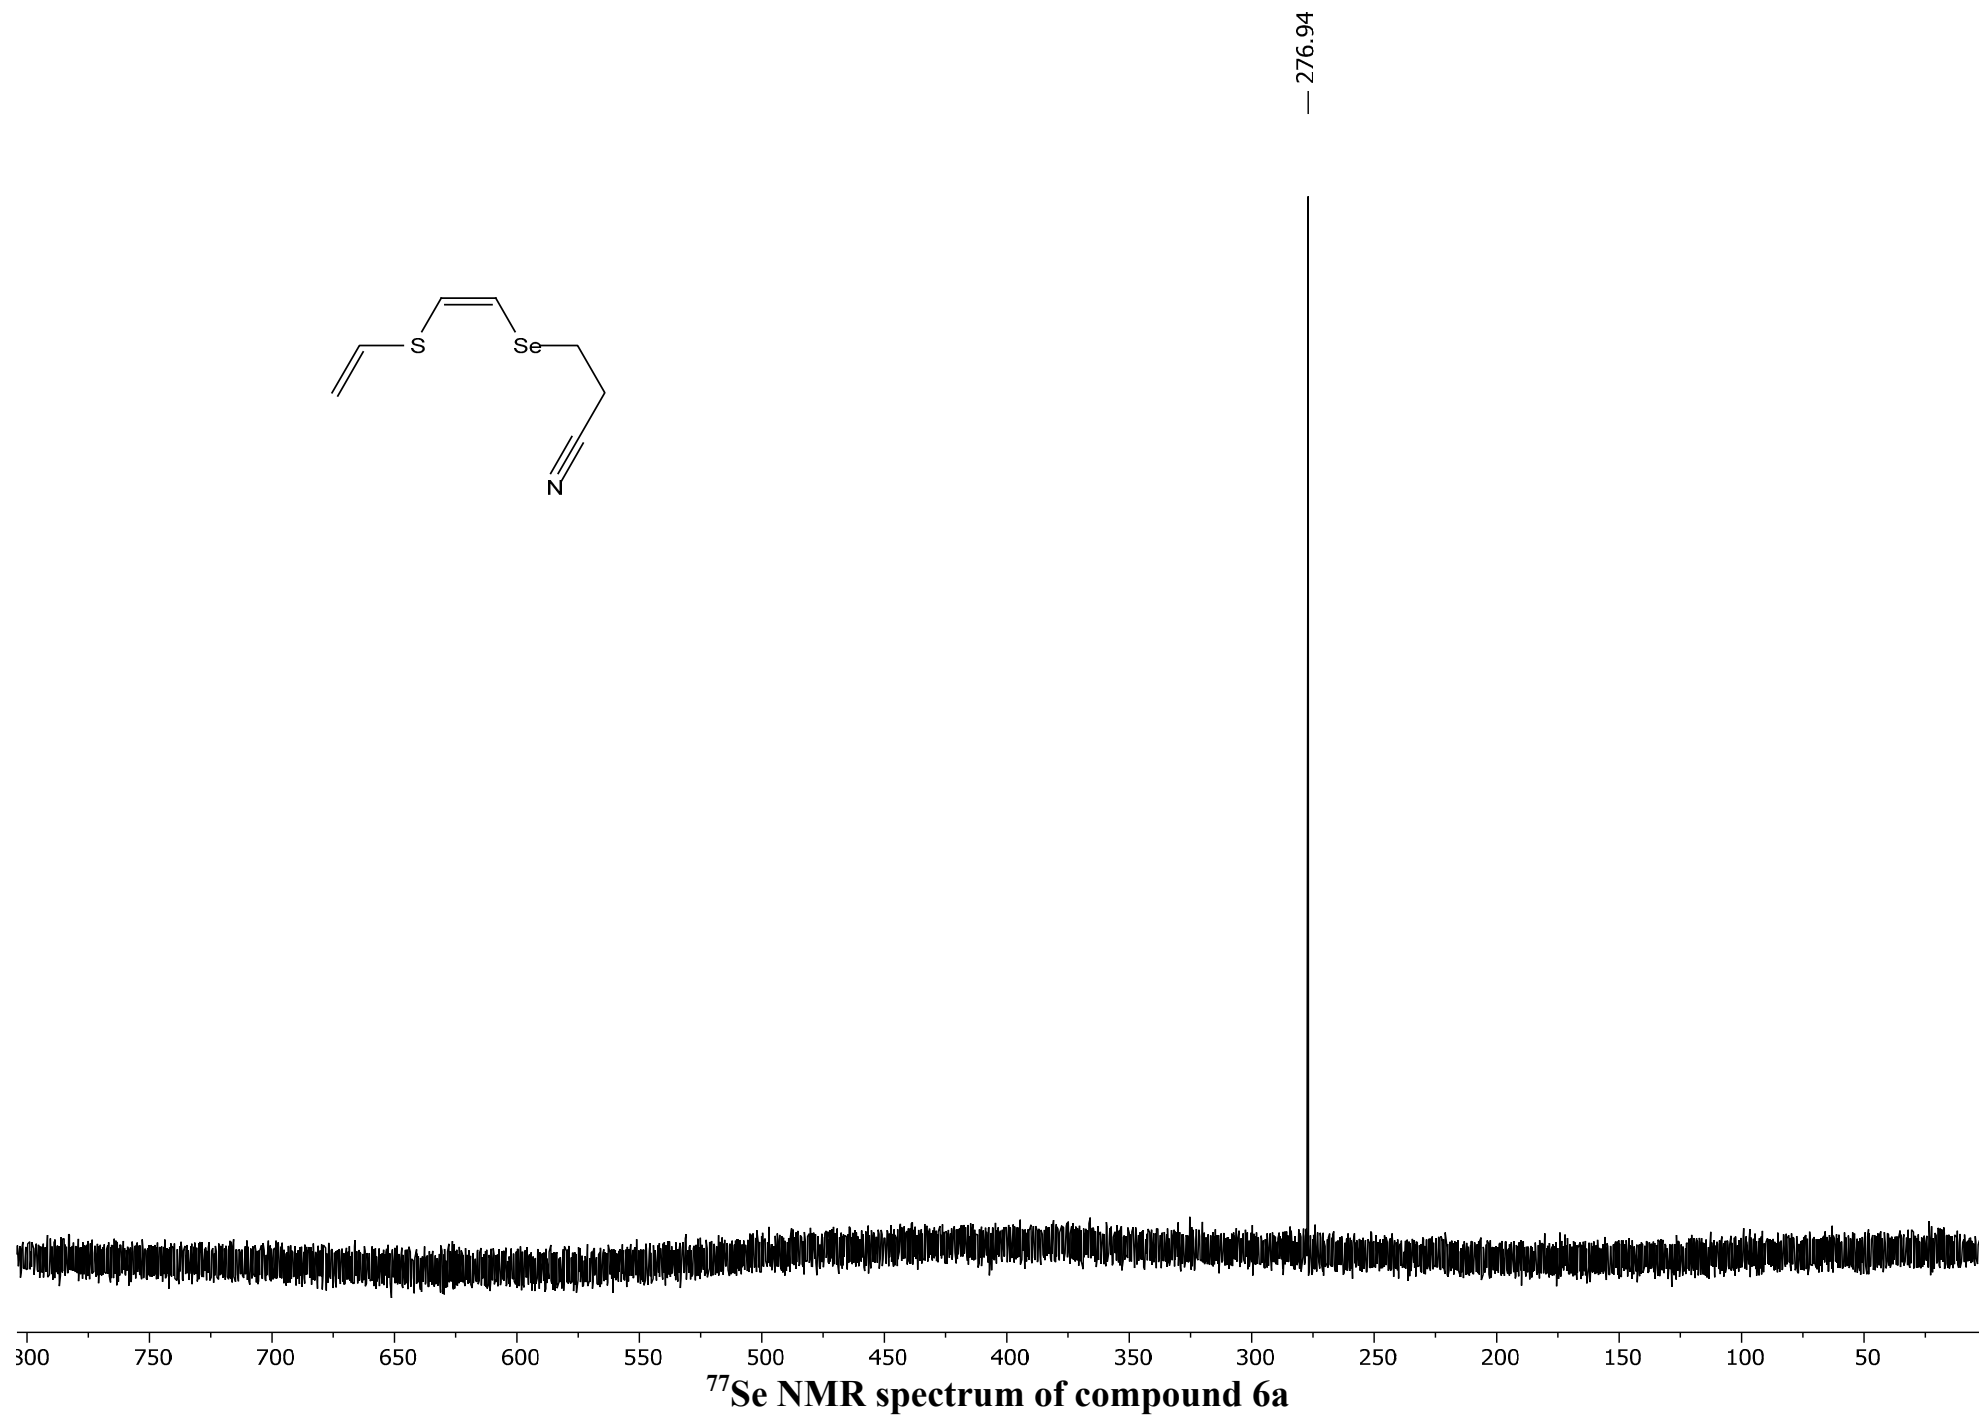

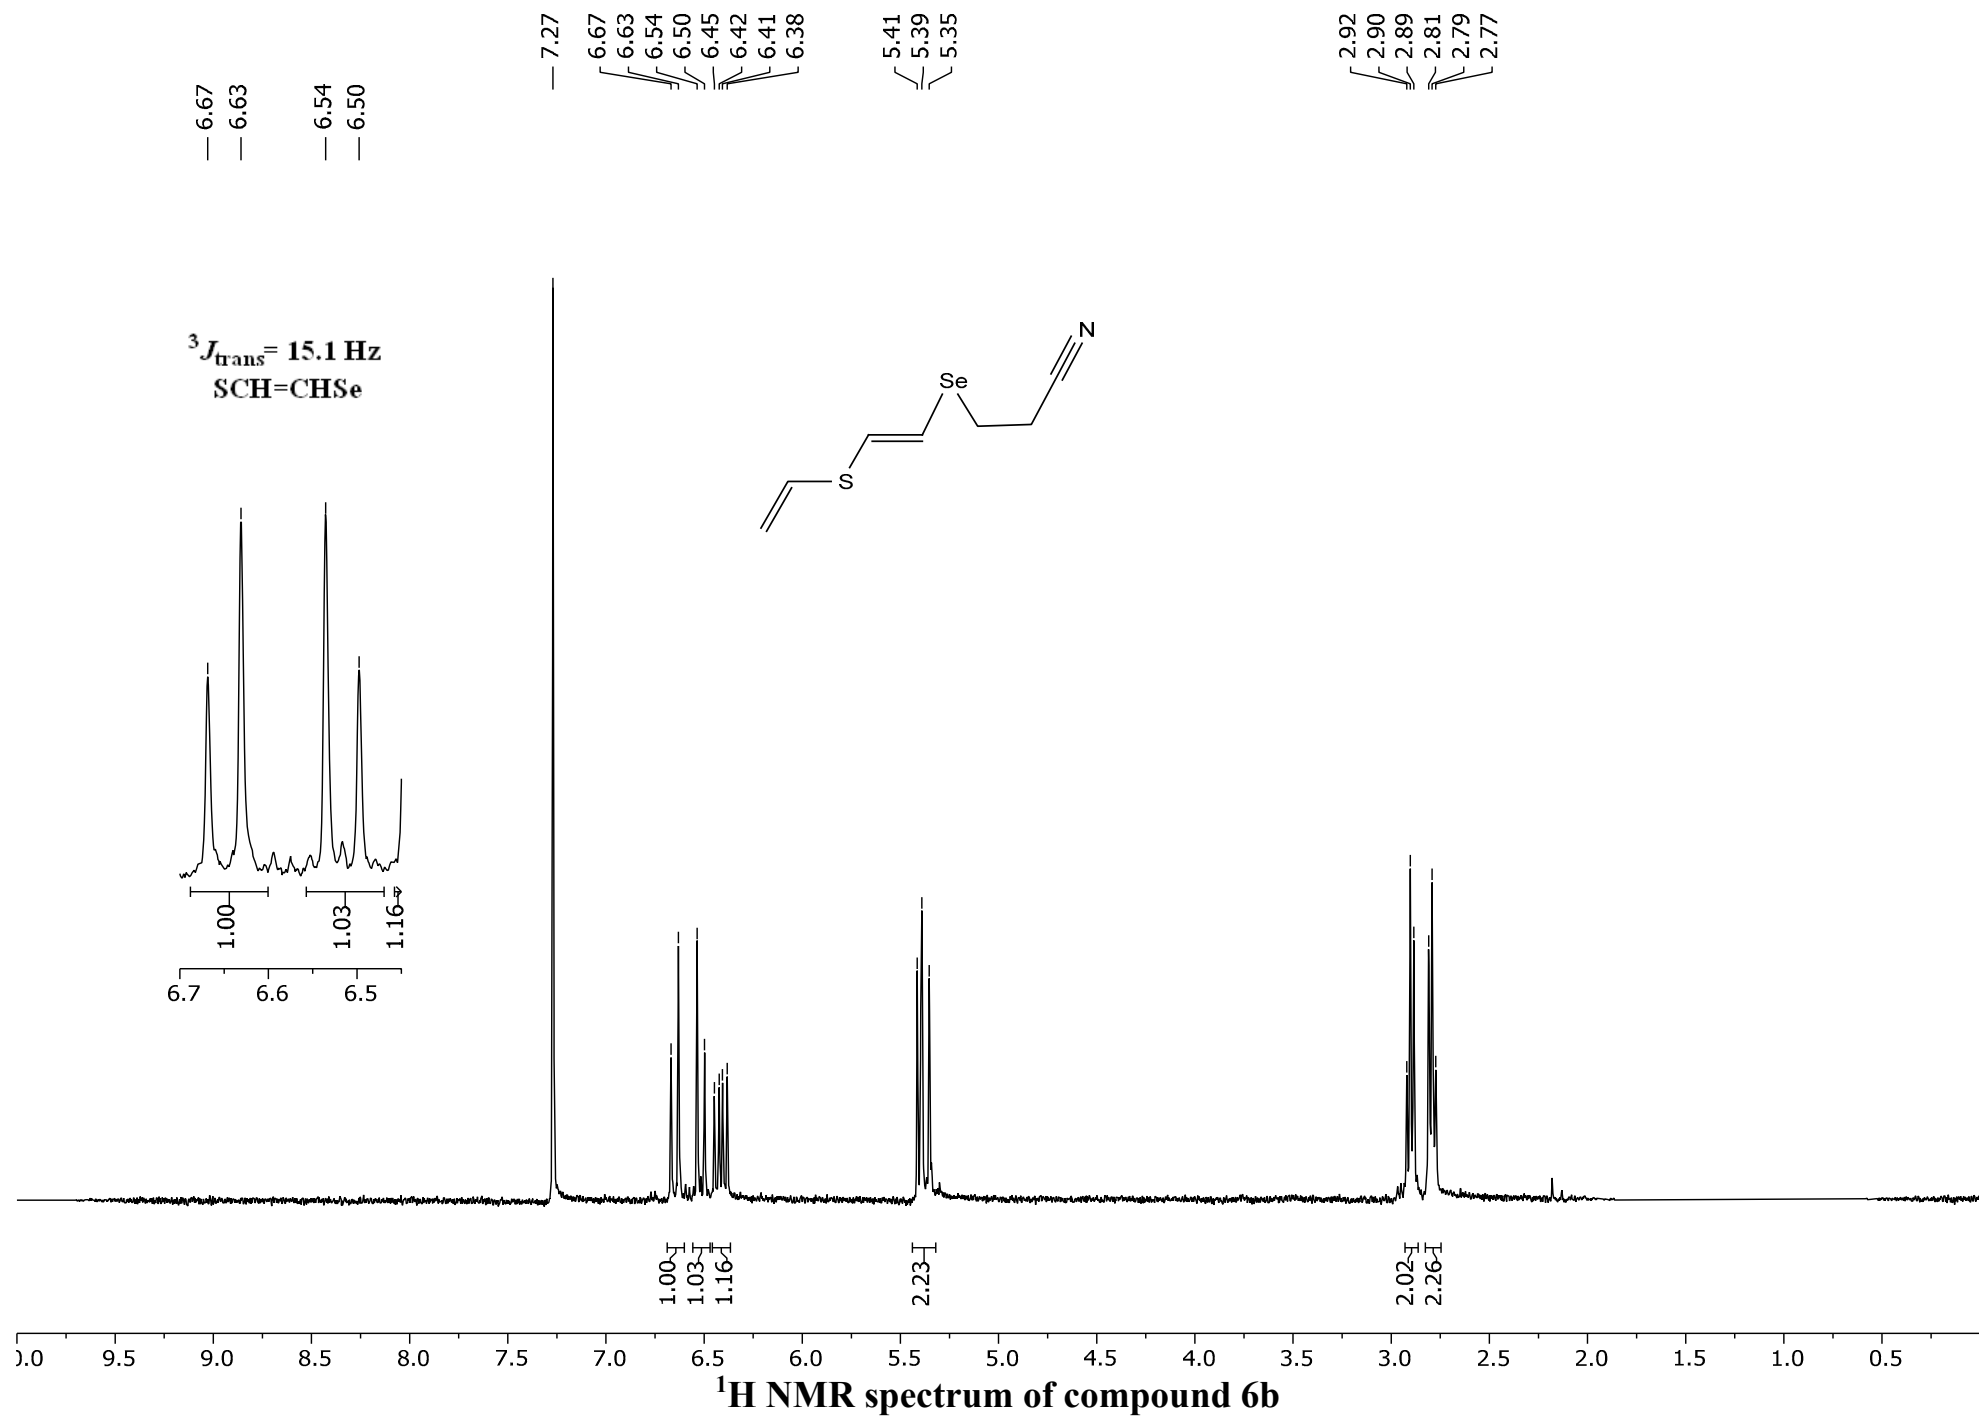



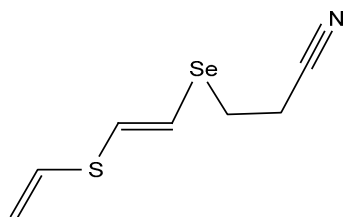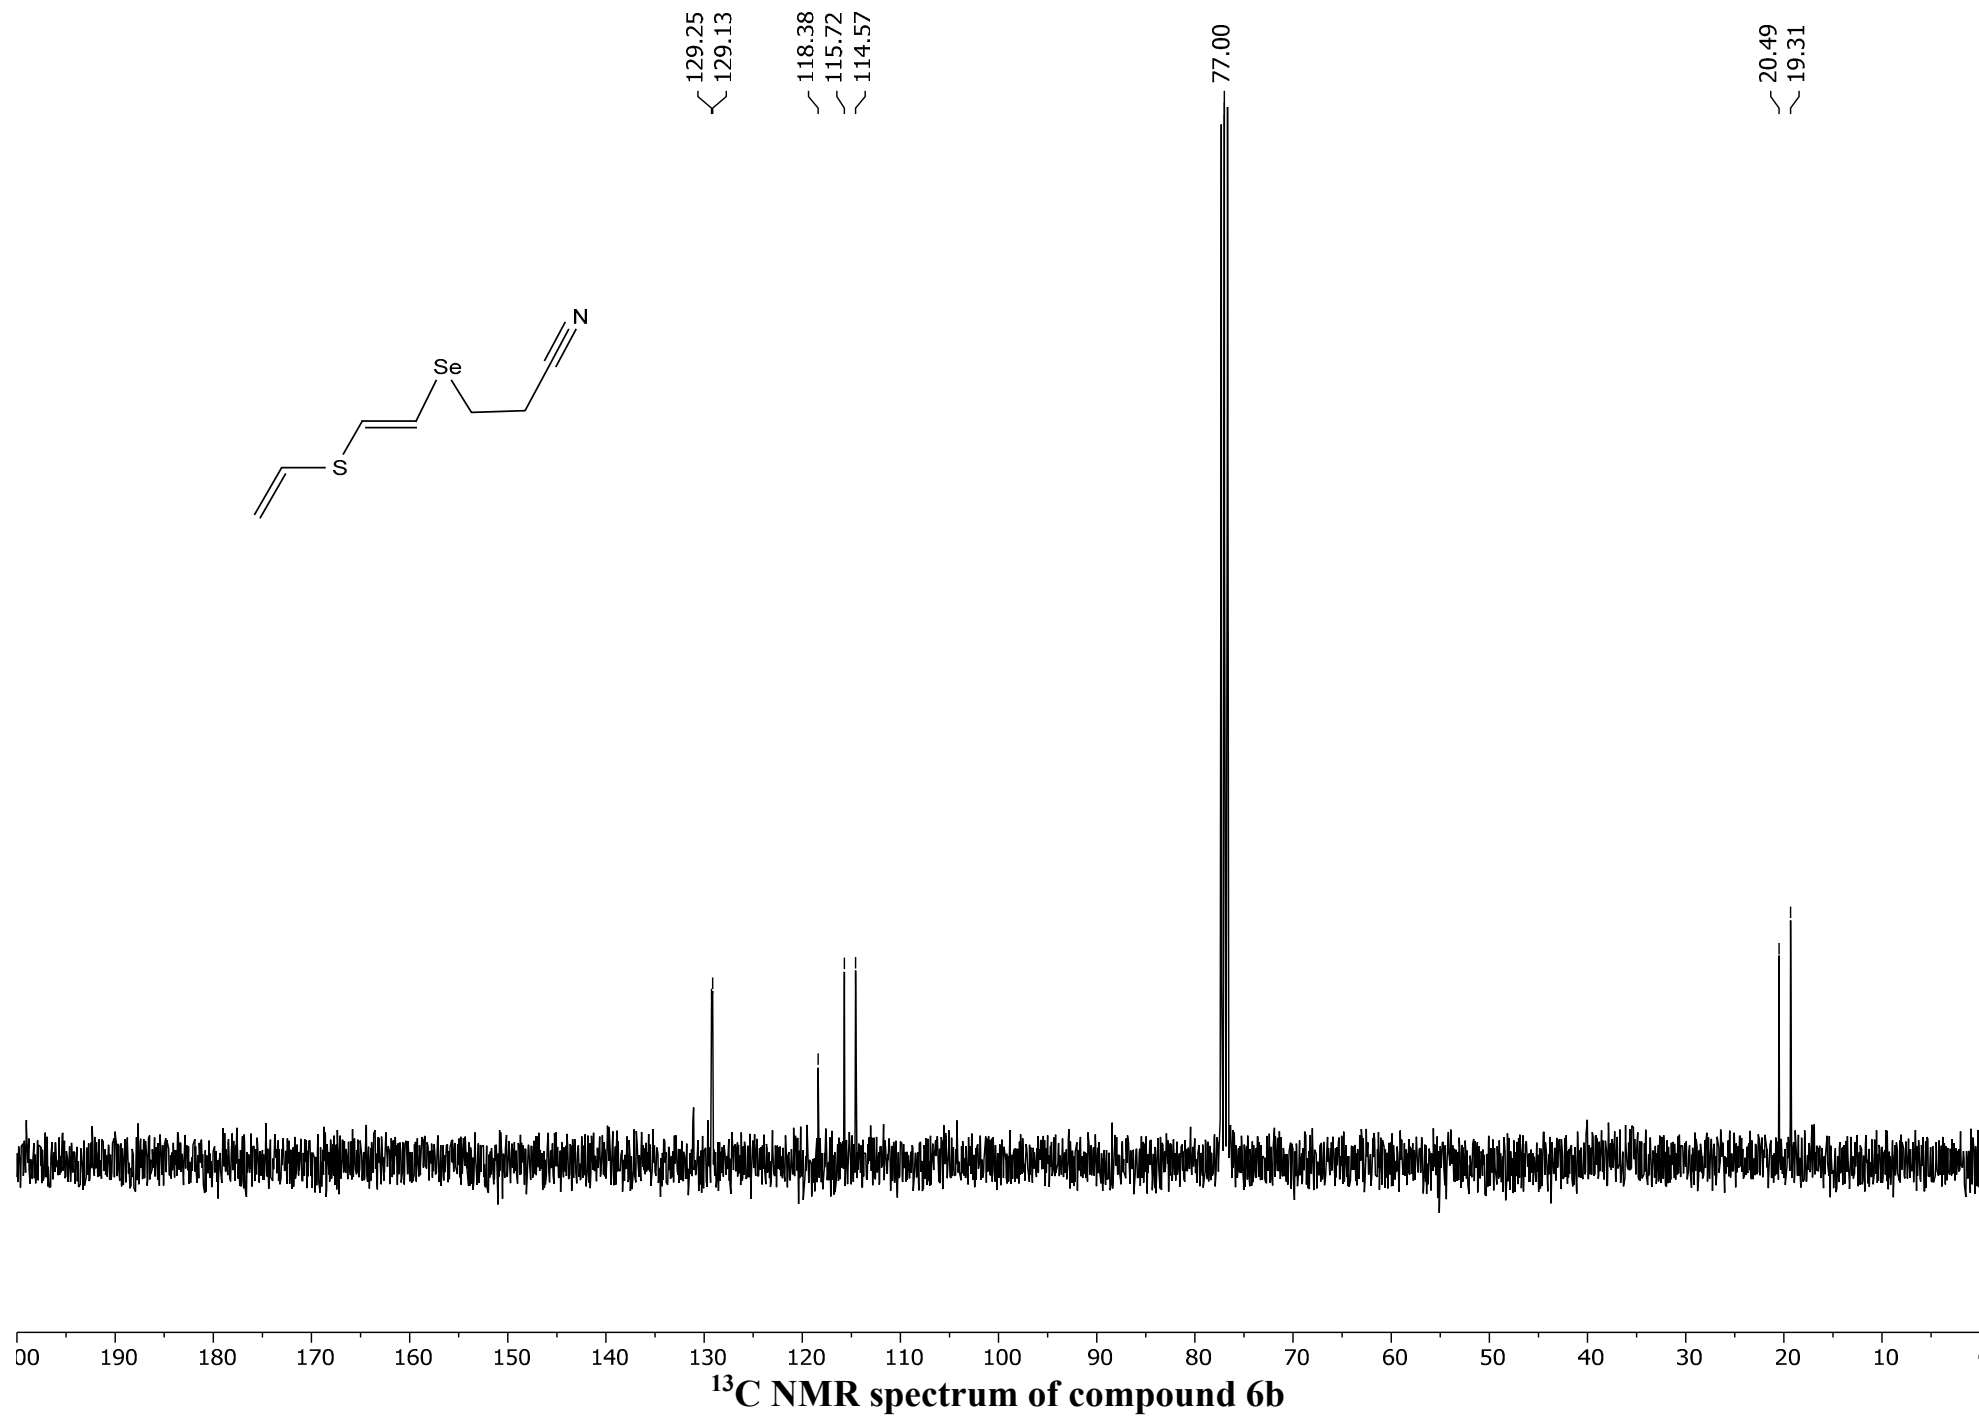

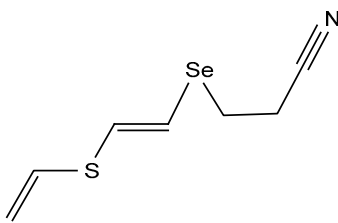

— 312.93

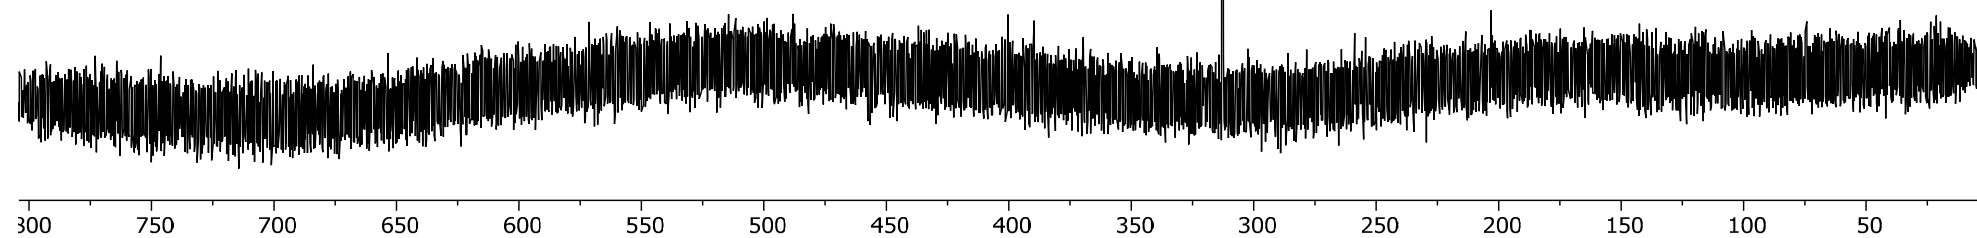

$^{77}\text{Se}$  NMR spectrum of compound 6b

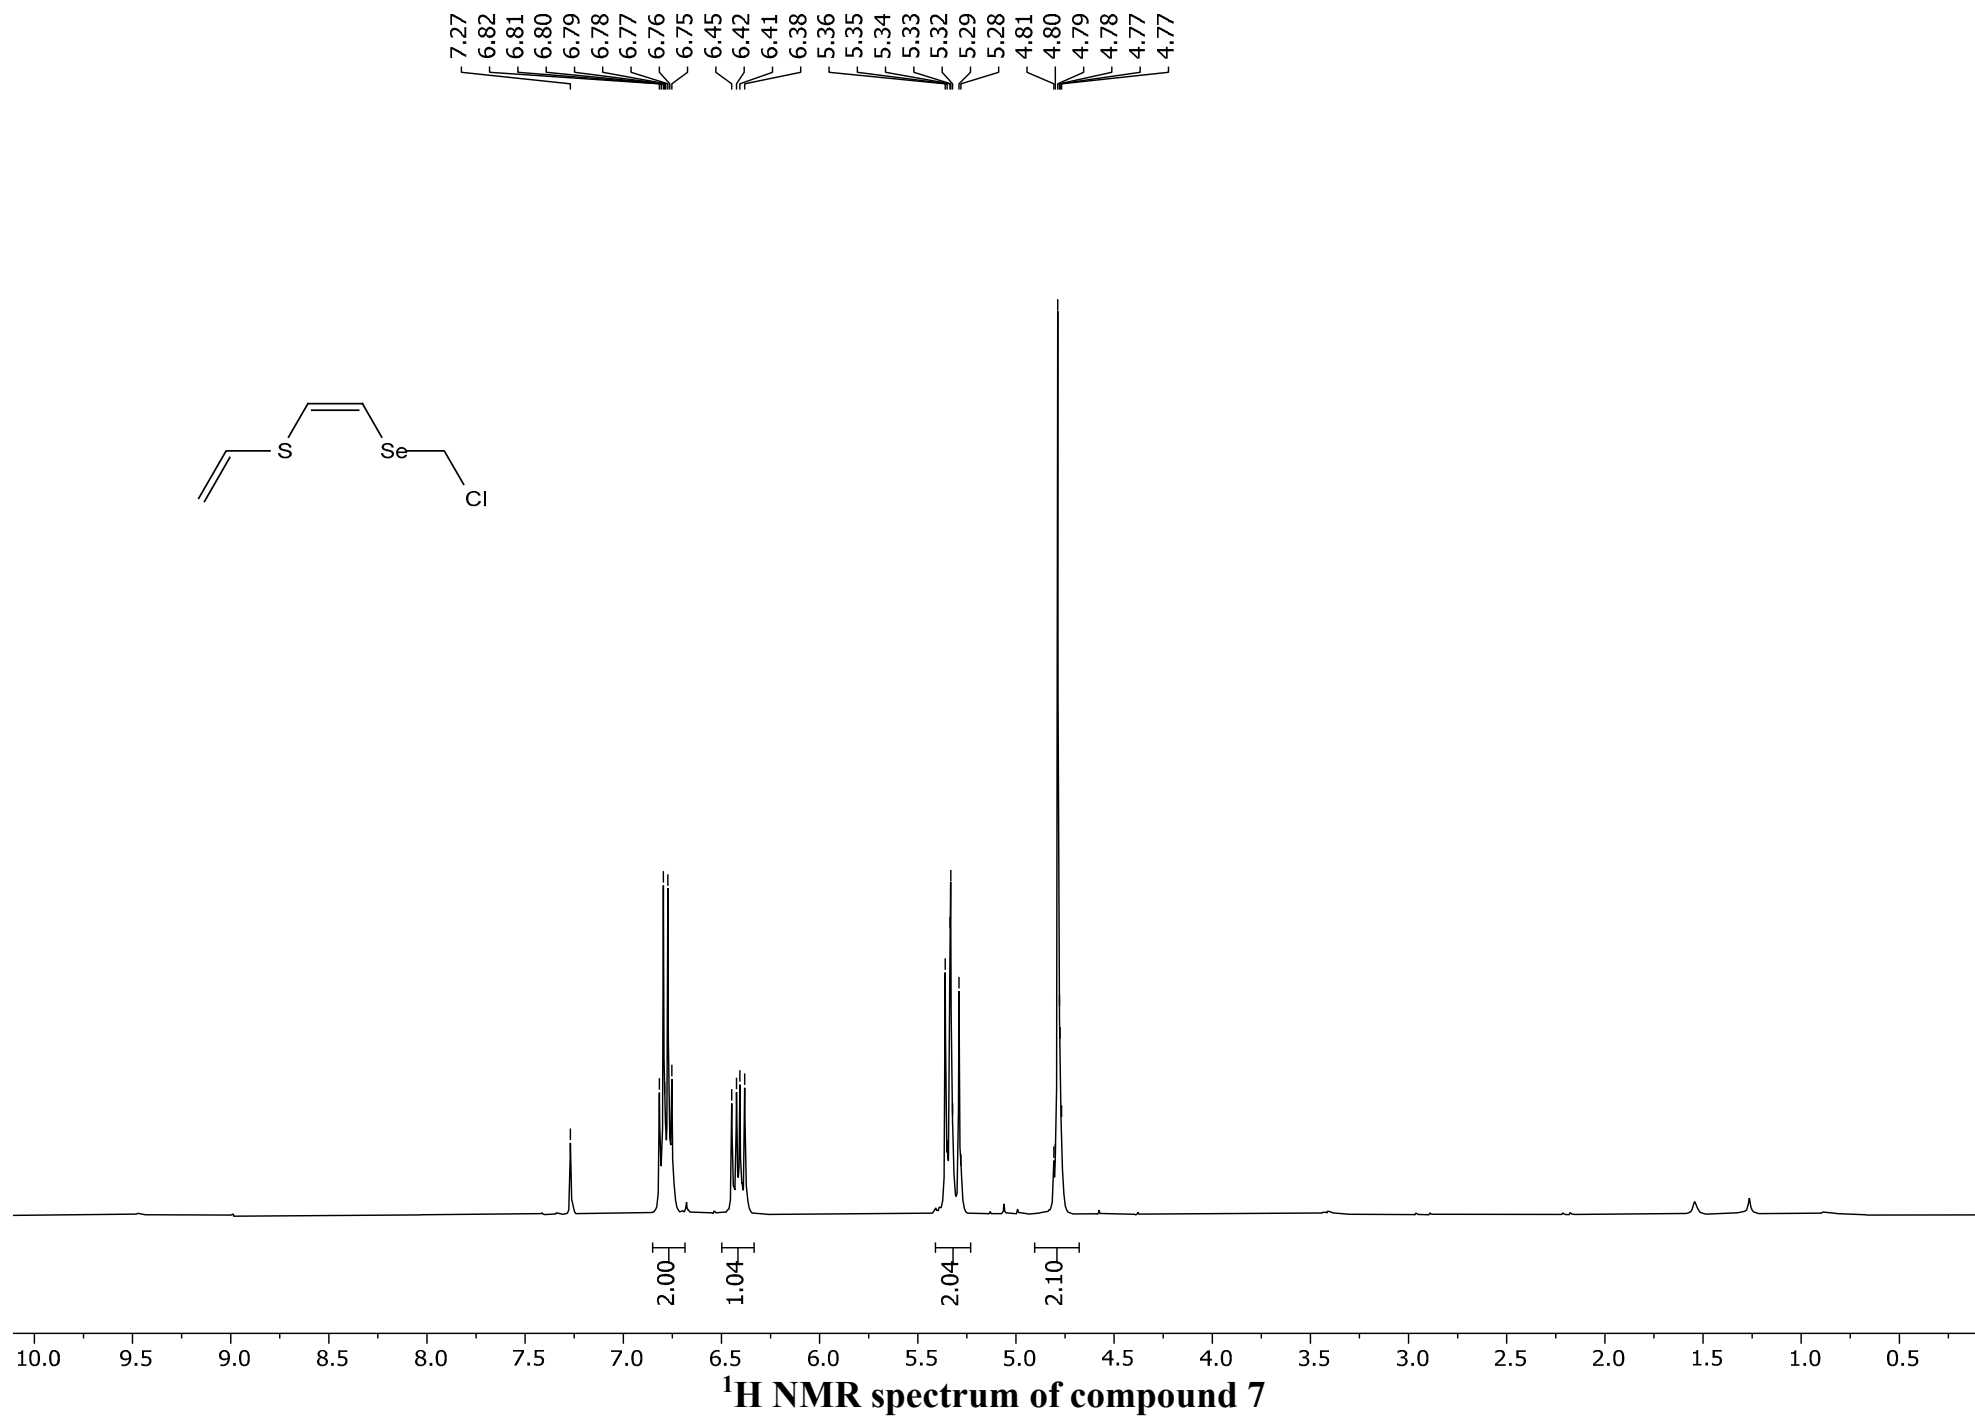

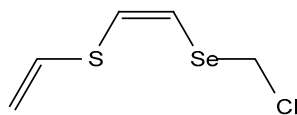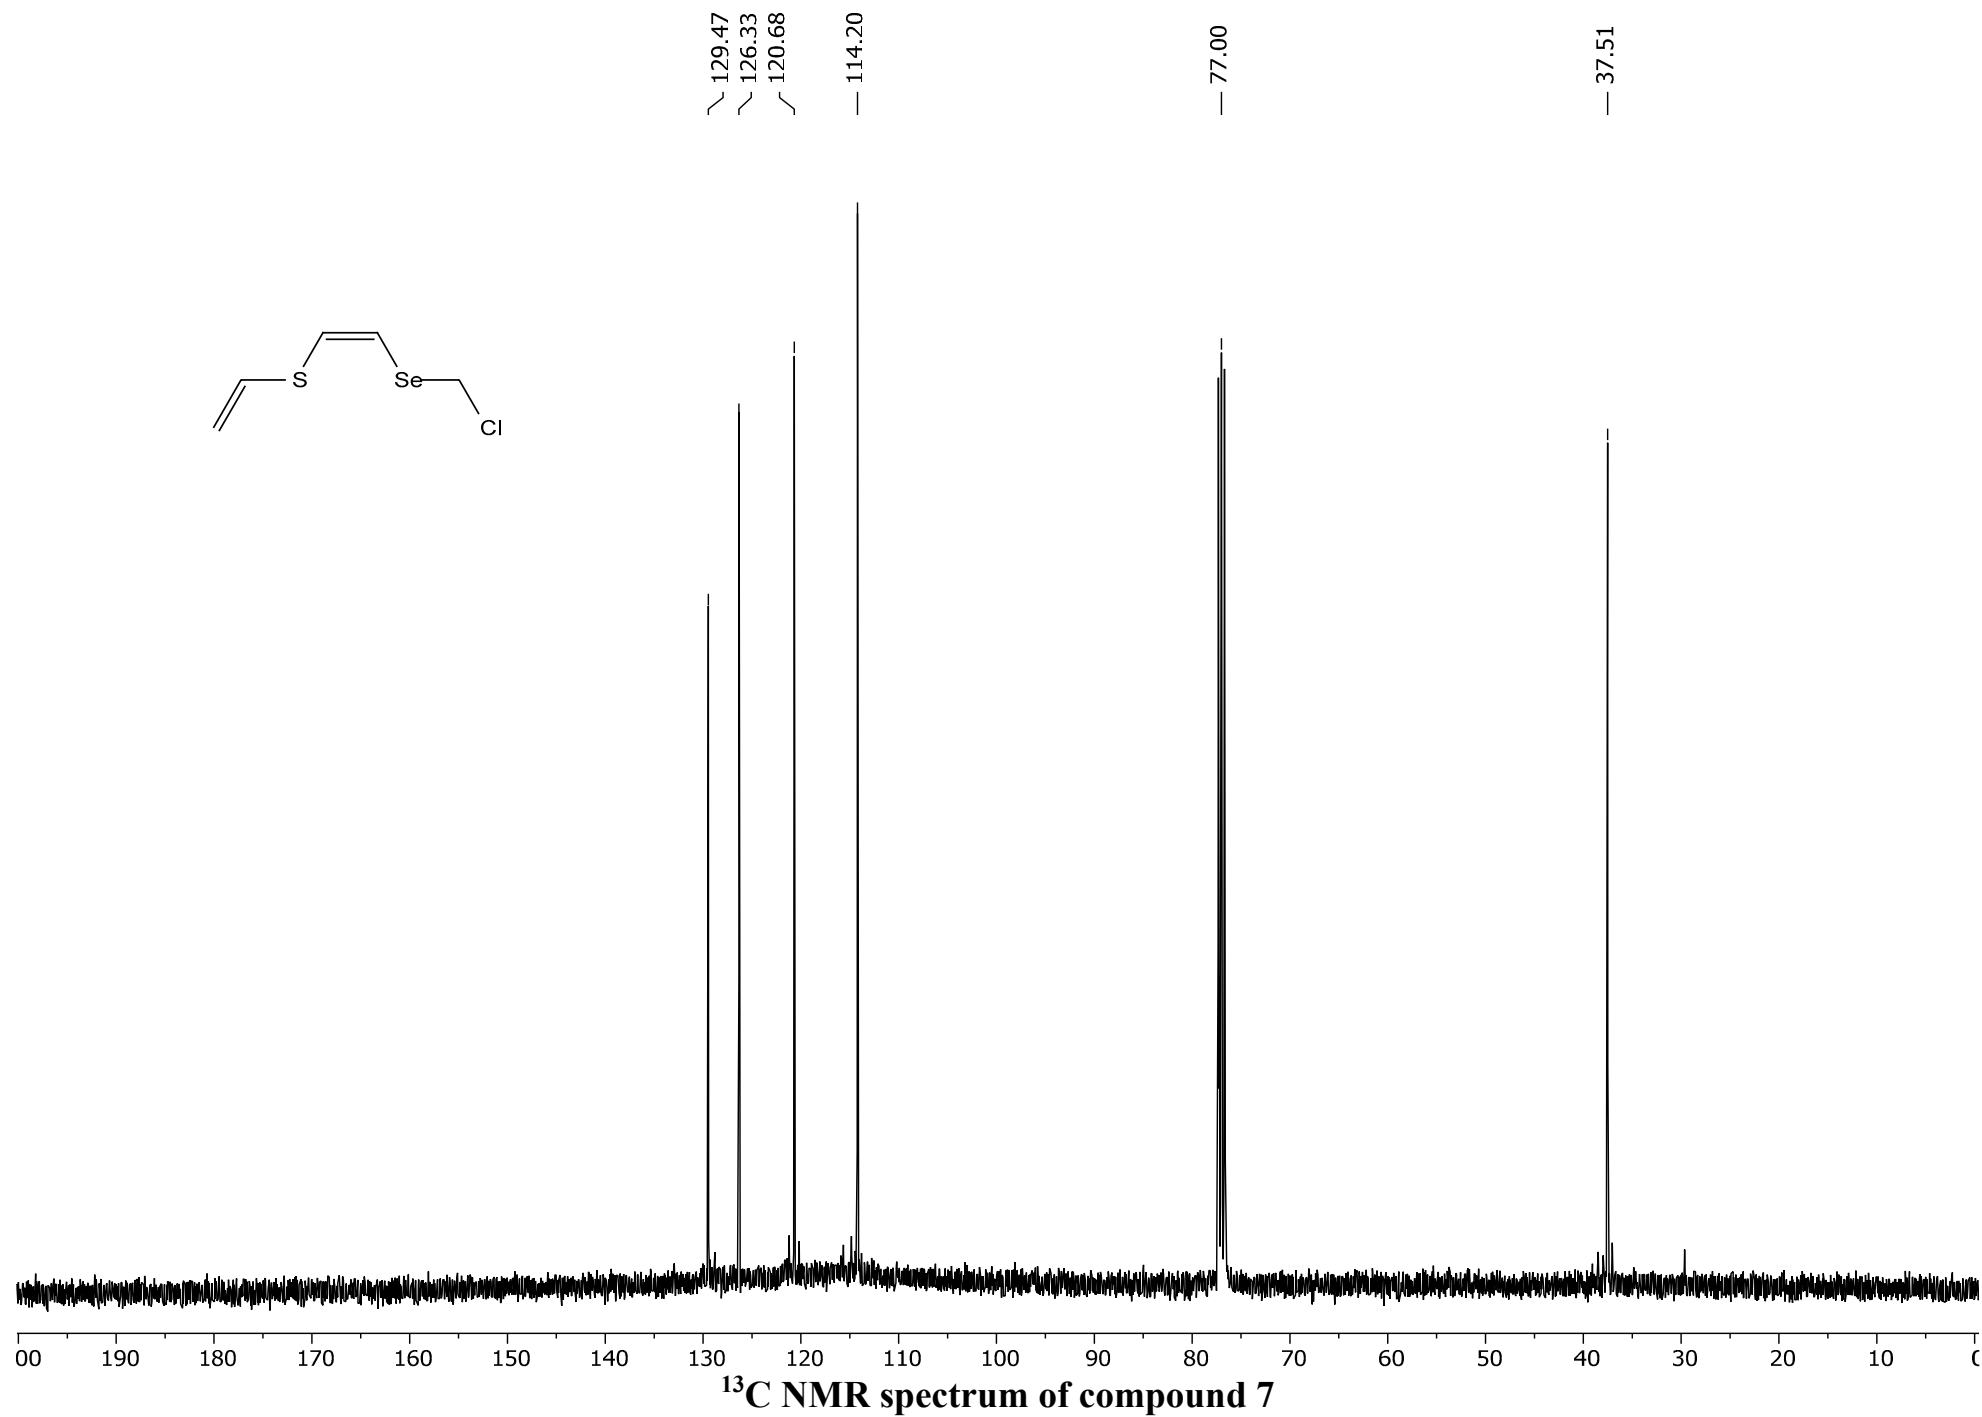

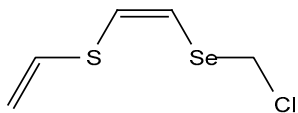

— 396.12

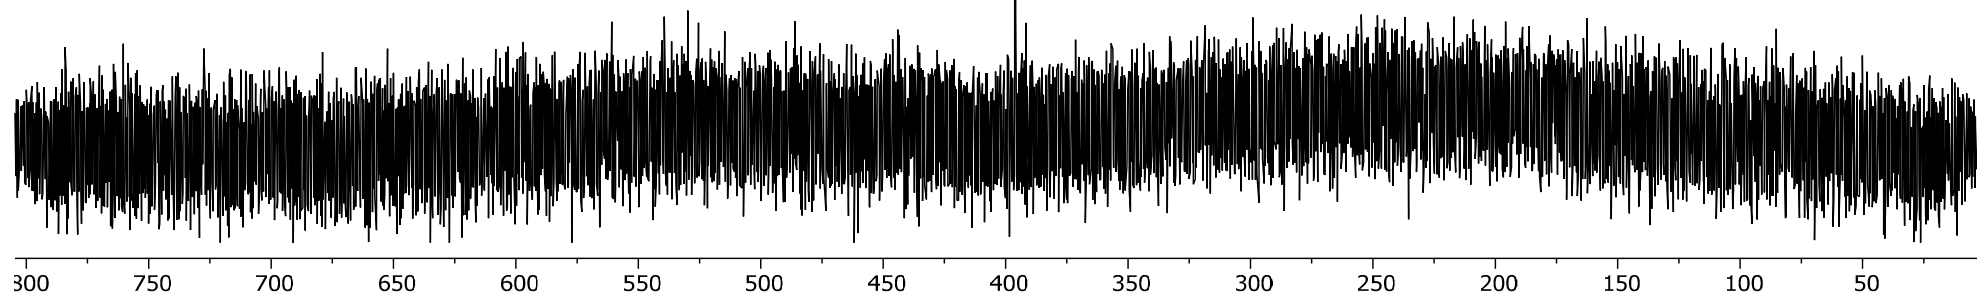

$^{77}\text{Se}$  NMR spectrum of compound 7

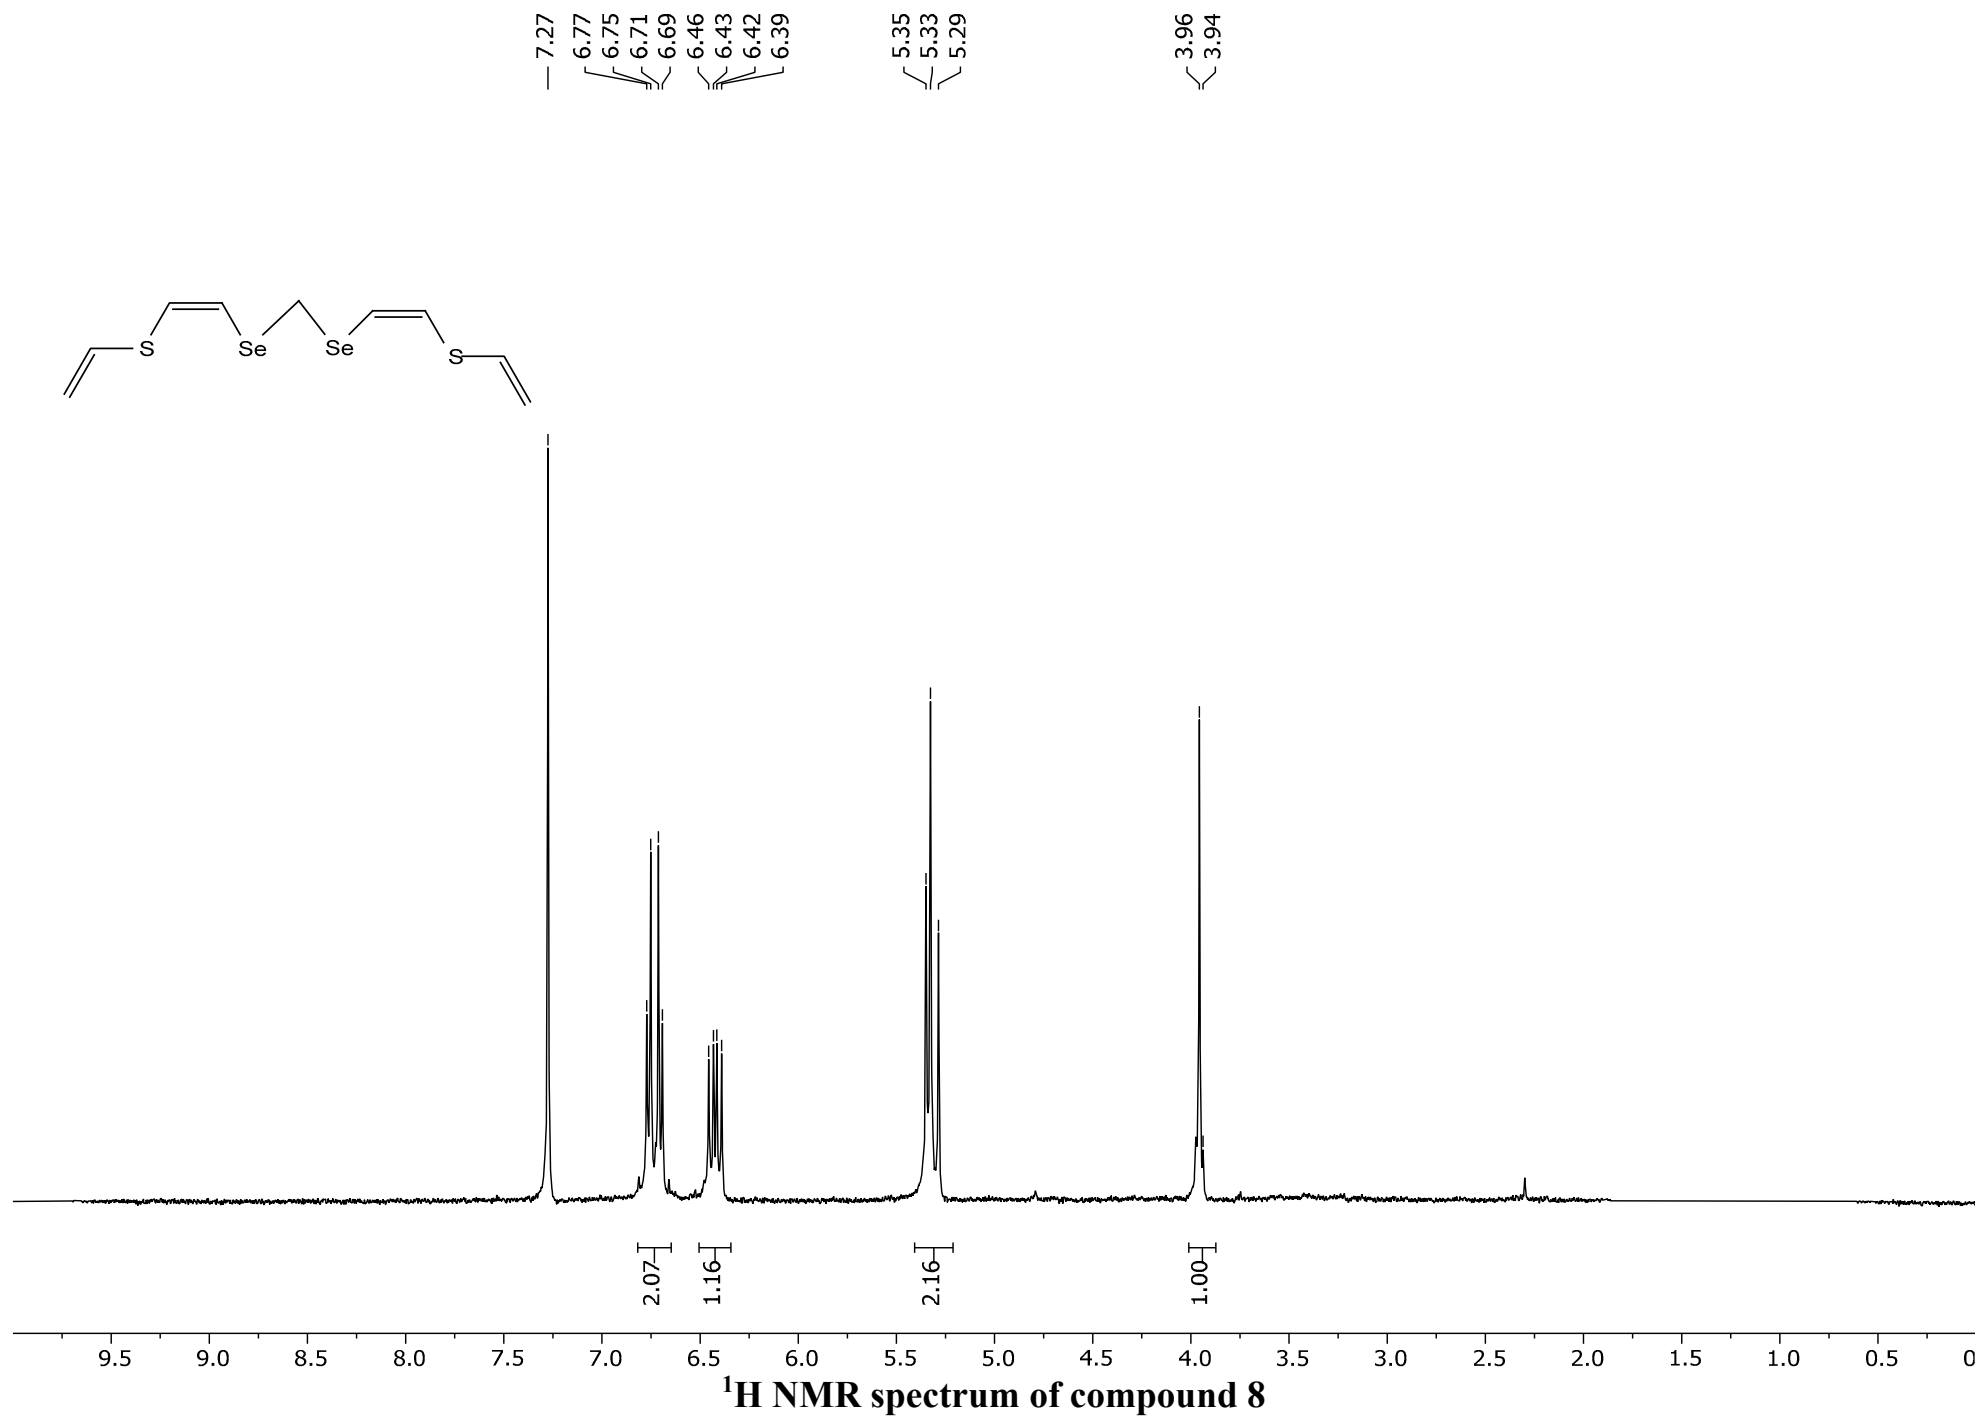

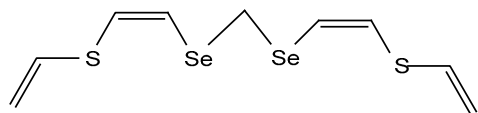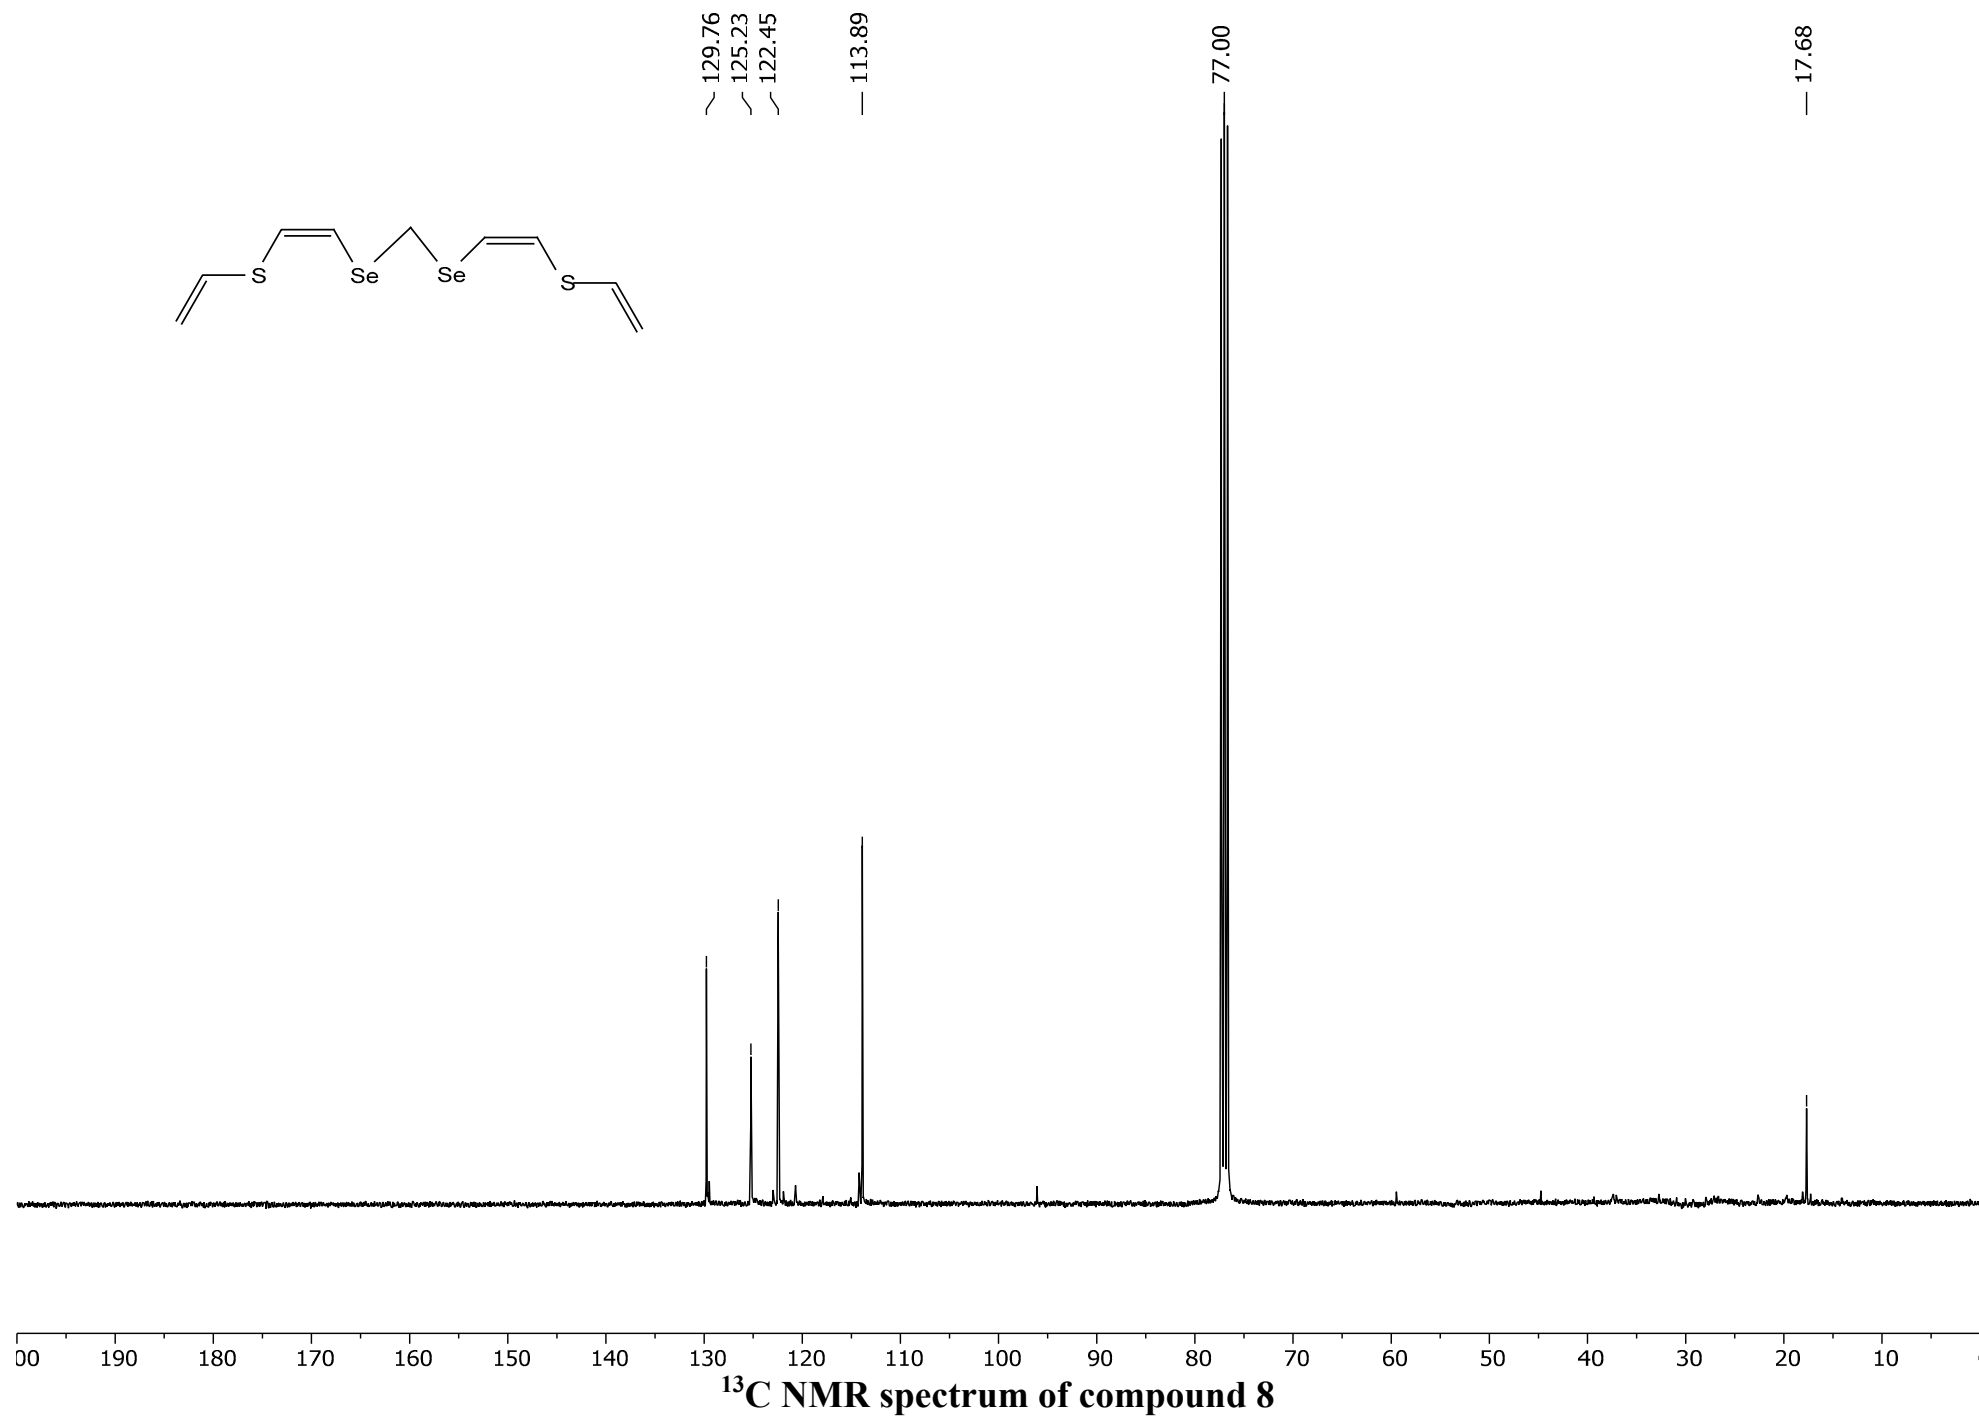

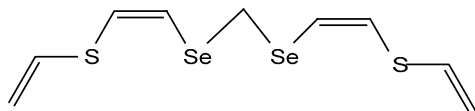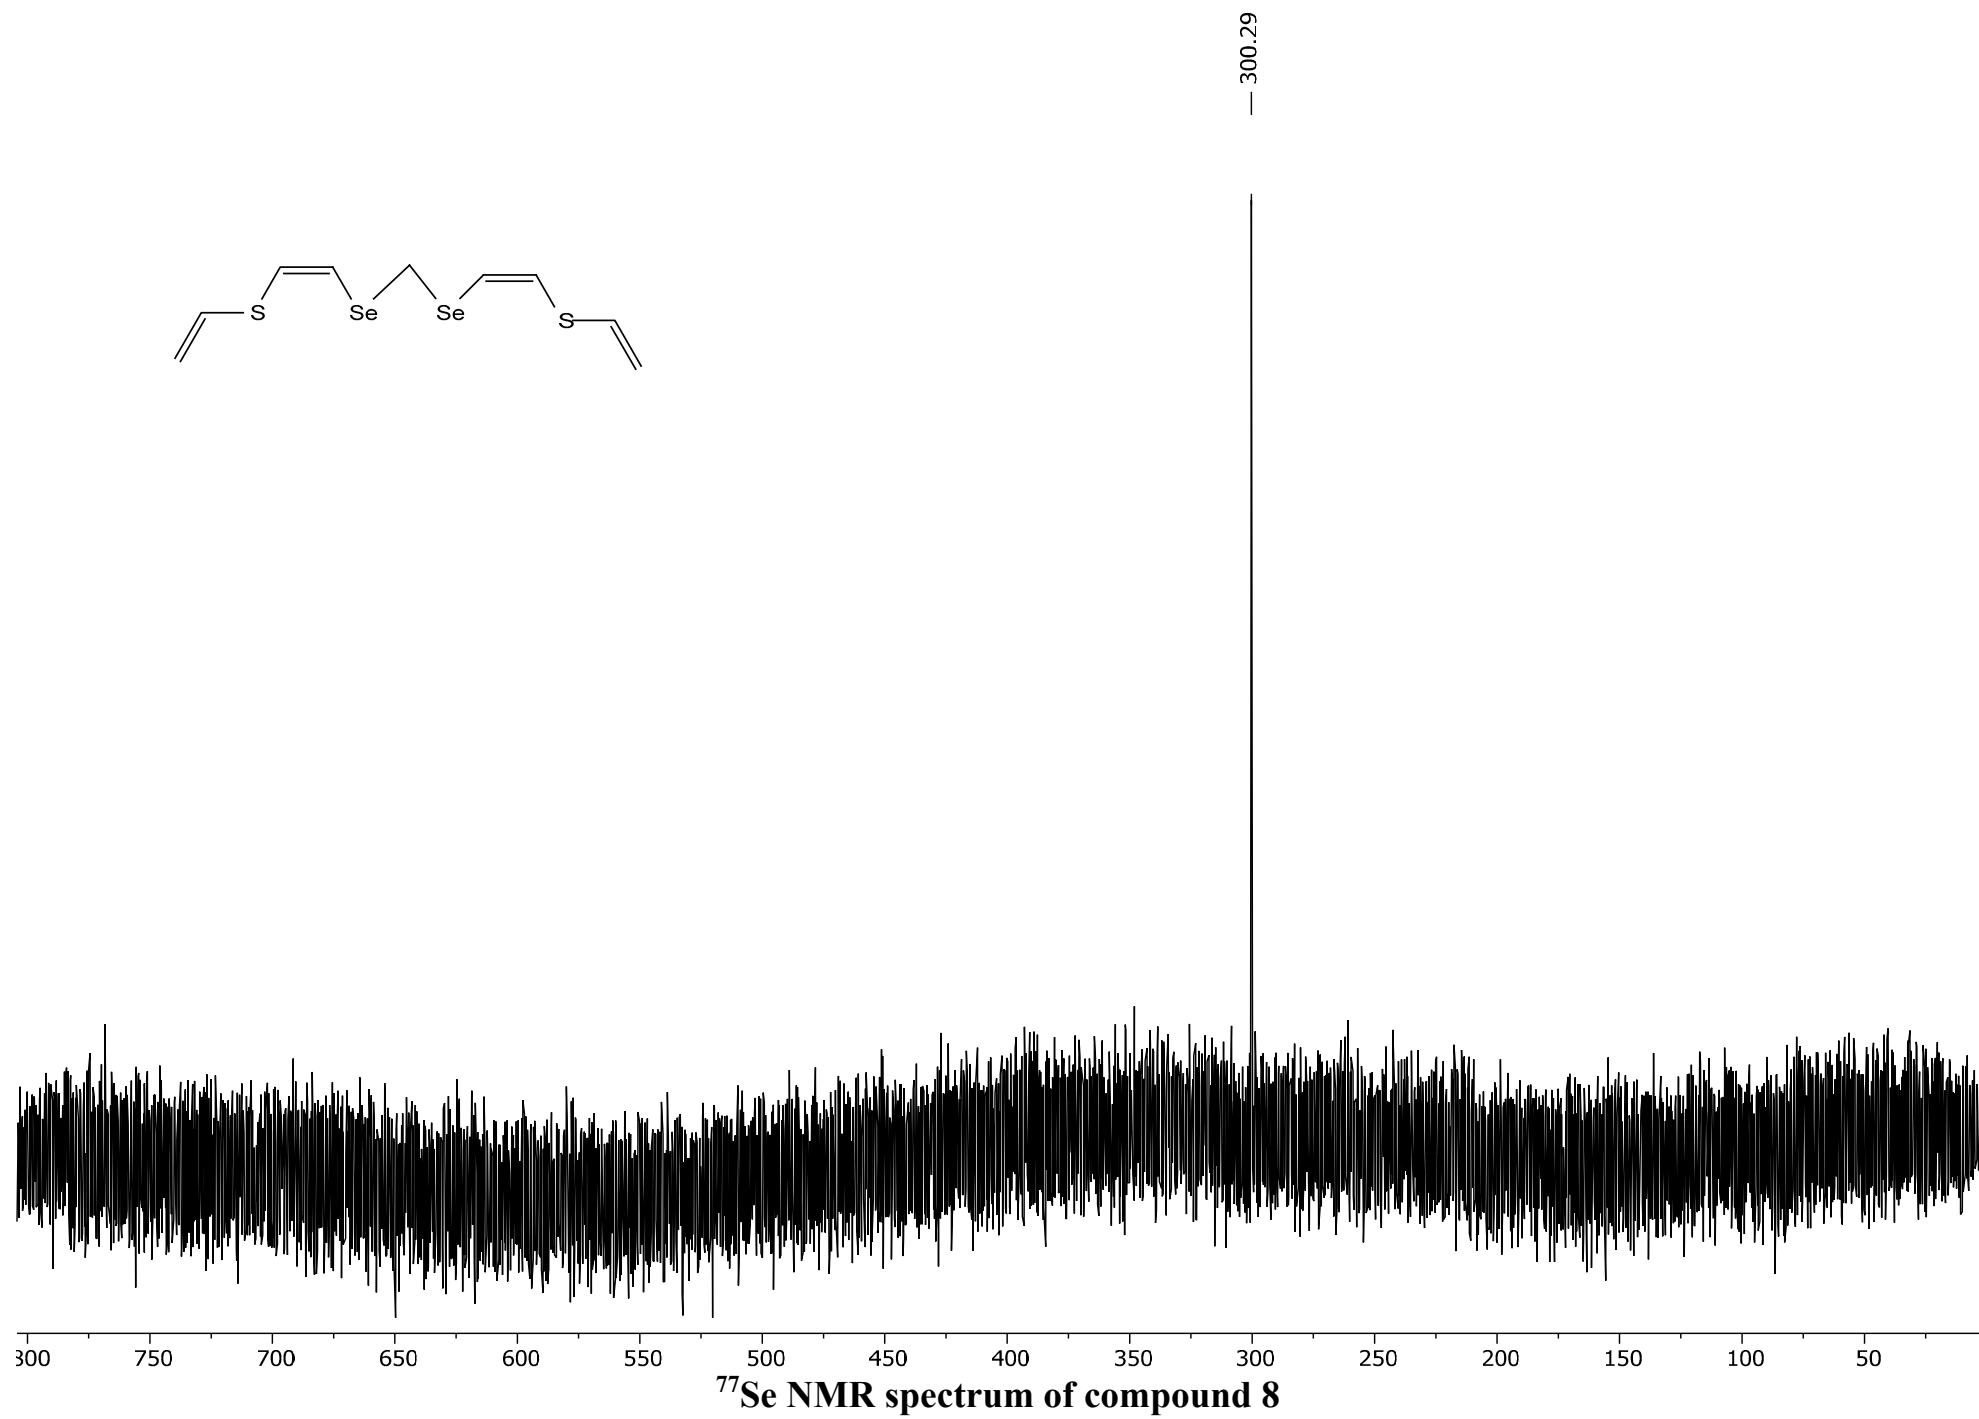

Supplement: s1 [file s1]
